# Supplementary material for: Intervention elements to reduce inappropriate prescribing for older adults with multimorbidity receiving outpatient care: a scoping review
Source: PubMed Central journal article supplement — BMJ Open. 2020 Aug 20;10(8):e039543. doi: 10.1136/bmjopen-2020-039543 (PMC7440708; doi:10.1136/bmjopen-2020-039543), 2020-08-20
Supplement: bmjopen-2020-039543.draft_revisions.pdf [file bmjopen-2020-039543.draft_revisions.pdf]

# BMJ Open

BMJ Open is committed to open peer review. As part of this commitment we make the peer review history of every article we publish publicly available.

When an article is published we post the peer reviewers' comments and the authors' responses online. We also post the versions of the paper that were used during peer review. These are the versions that the peer review comments apply to.

The versions of the paper that follow are the versions that were submitted during the peer review process. They are not the versions of record or the final published versions. They should not be cited or distributed as the published version of this manuscript.

BMJ Open is an open access journal and the full, final, typeset and author-corrected version of record of the manuscript is available on our site with no access controls, subscription charges or pay-per-view fees (<http://bmjopen.bmj.com>).

If you have any questions on BMJ Open's open peer review process please email [info.bmjopen@bmj.com](mailto:info.bmjopen@bmj.com)

# BMJ Open

## Intervention Elements to Reduce Inappropriate Prescribing for Older Adults with Multimorbidity Receiving Outpatient Care: A Scoping Review

|                               |                                                                                                                                                                                                                                                                                                                                                                                                                                                            |
|-------------------------------|------------------------------------------------------------------------------------------------------------------------------------------------------------------------------------------------------------------------------------------------------------------------------------------------------------------------------------------------------------------------------------------------------------------------------------------------------------|
| Journal:                      | <i>BMJ Open</i>                                                                                                                                                                                                                                                                                                                                                                                                                                            |
| Manuscript ID                 | bmjopen-2020-039543                                                                                                                                                                                                                                                                                                                                                                                                                                        |
| Article Type:                 | Original research                                                                                                                                                                                                                                                                                                                                                                                                                                          |
| Date Submitted by the Author: | 18-Apr-2020                                                                                                                                                                                                                                                                                                                                                                                                                                                |
| Complete List of Authors:     | Lee, Jia Qi; Geriatric Education and Research Institute Ltd, Ying, Kate; Geriatric Education and Research Institute Ltd Lun, Penny; Geriatric Education and Research Institute Ltd Tan, Keng Teng; Tan Tock Seng Hospital, Pharmacy Ang, Wendy; Changi General Hospital, Pharmacy Munro, Yasmin; Lee Kong Chian School of Medicine, Medical Library Ding, Yew; Tan Tock Seng Hospital, Geriatric Medicine; Geriatric Education and Research Institute Ltd, |
| Keywords:                     | GERIATRIC MEDICINE, PRIMARY CARE, Quality in health care < HEALTH SERVICES ADMINISTRATION & MANAGEMENT                                                                                                                                                                                                                                                                                                                                                     |
|                               |                                                                                                                                                                                                                                                                                                                                                                                                                                                            |

SCHOLARONE™  
Manuscripts

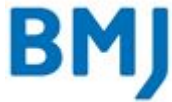

I, the Submitting Author has the right to grant and does grant on behalf of all authors of the Work (as defined in the below author licence), an exclusive licence and/or a non-exclusive licence for contributions from authors who are: i) UK Crown employees; ii) where BMJ has agreed a CC-BY licence shall apply, and/or iii) in accordance with the terms applicable for US Federal Government officers or employees acting as part of their official duties; on a worldwide, perpetual, irrevocable, royalty-free basis to BMJ Publishing Group Ltd ("BMJ") its licensees and where the relevant Journal is co-owned by BMJ to the co-owners of the Journal, to publish the Work in this journal and any other BMJ products and to exploit all rights, as set out in our [licence](#).

The Submitting Author accepts and understands that any supply made under these terms is made by BMJ to the Submitting Author unless you are acting as an employee on behalf of your employer or a postgraduate student of an affiliated institution which is paying any applicable article publishing charge ("APC") for Open Access articles. Where the Submitting Author wishes to make the Work available on an Open Access basis (and intends to pay the relevant APC), the terms of reuse of such Open Access shall be governed by a Creative Commons licence – details of these licences and which [Creative Commons](#) licence will apply to this Work are set out in our licence referred to above.

Other than as permitted in any relevant BMJ Author's Self Archiving Policies, I confirm this Work has not been accepted for publication elsewhere, is not being considered for publication elsewhere and does not duplicate material already published. I confirm all authors consent to publication of this Work and authorise the granting of this licence.

1  
2  
3 **Intervention Elements to Reduce Inappropriate Prescribing for Older Adults with**  
4 **Multimorbidity Receiving Outpatient Care: A Scoping Review**  
5  
6

7 Jia Qi Lee<sup>1</sup>, Kate Ying<sup>1</sup>, Penny Lun<sup>1</sup>, Keng Teng Tan<sup>2</sup>, Wendy Ang<sup>3</sup>, Yasmin Lynda Munro<sup>4</sup>, Yew  
8 Yoong Ding<sup>1,5</sup>  
9  
10

11 **Author affiliations:**  
12  
13

14 <sup>1</sup> Geriatric Education And Research Institute Limited, Singapore  
15

16 <sup>2</sup> Department of Pharmacy, Tan Tock Seng Hospital, Singapore  
17  
18

19 <sup>3</sup> Department of Pharmacy, Changi General Hospital, Singapore  
20  
21

22 <sup>4</sup> Medical Library, Lee Kong Chian School of Medicine, Singapore  
23  
24

25 <sup>5</sup> Geriatric Medicine, Tan Tock Seng Hospital, Singapore  
26  
27  
28

29 **Author responsible for correspondence:**  
30

31 Lee Jia Qi, Research Officer, Geriatric Education and Research Institute, 2 Yishun Central,  
32 Singapore 768024, Tel: 65-68078033, Email: [jiaqi.lee0712@gmail.com](mailto:jiaqi.lee0712@gmail.com)  
33  
34

35 **Word count**  
36

37 Main Text: 3674  
38

39 Abstract: 289  
40  
41  
42

43 **Tables and figures**  
44

45  
46 No. of tables: 4  
47

48 No. of figures: 1  
49  
50  
51  
52  
53  
54  
55  
56  
57  
58  
59  
60

## Intervention Elements to Reduce Inappropriate Prescribing for Older Adults with Multimorbidity Receiving Outpatient Care: A Scoping Review

### ABSTRACT

**Objective:** Polypharmacy occurs in approximately 30% of older adults aged 65 years or more, particularly among those with multimorbidity. With polypharmacy, there is an associated risk of potentially inappropriate prescribing (PIP). The aims of this scoping review were to (i) identify the intervention elements that have been adopted to reduce PIP in the outpatient setting and (ii) determine the Behaviour Change Wheel intervention functions performed by each of the identified intervention elements.

**Design:** Scoping Review

**Data sources:** PubMed, CINAHL, EMBASE, Web of Science and Cochrane Library databases, grey literature sources, six key geriatrics journals and the reference lists of review papers.

**Study selection:** All studies reporting an intervention or strategy that addressed PIP in the older adult population (age  $\geq 65$ ) with multimorbidity in the outpatient setting and in which the primary prescriber is the physician.

**Data extraction:** Data extracted from the included studies can be broadly categorized into (i) publication details (ii) intervention details and (iii) results. This was followed by data synthesis and analysis based on the Behaviour Change Wheel (BCW) framework[1].

**Results:** Of 8204 studies yielded, 80 studies were included in the final analysis and 14 intervention elements were identified. An average of two to three elements was adopted in each intervention. The three most used intervention elements were medication review (70%), training (26.3%) and tool/instrument(s) (22.5%). Among medication reviews, 60% involved pharmacists. The 14 intervention elements were mapped onto five intervention functions: “education”, “persuasion”, “training”, “environmental restructuring” and “enablement”.

**Conclusion:** PIP is a multi-faceted problem that involves multiple stakeholders. Interventions to address PIP have multiple elements targeting the behaviour of different stakeholders. The intervention elements and their corresponding functions identified in this scoping review will inform the design of complex interventions that aim to reduce PIP.

**Keywords:** aged; geriatrics; polypharmacy; ambulatory care; behaviour change wheel; intervention components

## ARTICLE SUMMARY

### Strength and limitations of this study:

- This is the first attempt to map the extent and nature of information on this topic in both peer-reviewed and grey literature.
- This study aimed to achieve methodological rigor by adhering closely to the scoping review framework outlined by Arksey & O'Malley[2] and applying the recommendations proposed by Levac *et al.*[3] and JBI[4].
- An appropriate theoretical framework was used to synthesize and analyze the data.
- The results from this review can be used to guide the design of complex interventions to reduce PIP among older adults.
- Consultation with experts and stakeholders was initiated at the time of writing and will be reported in a separate work.

## INTRODUCTION

Polypharmacy, commonly defined as the use of five or more medications daily, is an increasingly prevalent phenomenon among older adults as they tend to develop multiple chronic diseases or multimorbidity with age[5]. A longitudinal, cohort study of over 2,000 community-dwelling older adults of aged 62 to 85 years in the US showed that the prevalence of polypharmacy increased from 30.6% to 35.8% between 2005 and 2011[6]. Similar trends have also been observed in other developed countries, such as UK, Netherlands and Belgium[7–9]. Polypharmacy is a cause for concern as it predisposes older adults to potentially inappropriate prescribing (PIP), which occurs when medicines prescribed confer more harm than benefit[10]. Current clinical guidelines are designed to be disease-specific, and many do not take into consideration drug-disease and drug-drug interactions in their treatment recommendations[11,12]. In older adults, adverse side effects are made even more unpredictable by age-related changes in pharmacokinetics and pharmacodynamics[13,14]. This problem is further exacerbated by the fact that clinical trials often exclude older adults, which means approved drug doses may not be appropriate for geriatric patients[15].

1  
2  
3 It is estimated that up to 50% of older adults receive at least one unnecessary medication, and the  
4 incidence of PIP increases significantly with polypharmacy[16,17]. Older adults with at least 2  
5 PIP indicators based on the Screening Tool of Older Person's Potentially Inappropriate  
6 Prescriptions (STOPP) criteria were shown to be twice as likely to experience adverse drug events  
7 (ADEs)[18]. Apart from drug-related problems, older adults with PIP also reported poorer  
8 functional status, reduced health-related quality of life and increased health care utilization,  
9 including more frequent emergency department visits and hospitalizations[19–21]. Given the high  
10 prevalence of PIP and its adverse outcomes, it is therefore imperative for appropriate measures to  
11 be implemented to improve prescribing for older adults. With rising concern on suboptimal  
12 prescribing both internationally and at home, a three-phase implementation research project  
13 aiming to reduce PIP among older adults is underway. The first phase includes a literature review  
14 to examine interventions to reduce PIP among older adults with multimorbidity receiving  
15 outpatient care. While there have been several systematic reviews performed to explore  
16 interventions that address PIP, these reviews often include a limited number of studies as they only  
17 looked at either specific study types (e.g., randomized controlled trials[22]) or specific intervention  
18 types (e.g., computerized decision support systems[23] and pharmacist-led medication  
19 reviews[24]). Moreover, systematic reviews often restrict inclusion to studies that fulfill a certain  
20 standard of methodological rigour and reporting, which could result in the omission of a significant  
21 number of potentially relevant studies[25].  
22  
23  
24  
25  
26  
27  
28  
29  
30  
31  
32  
33  
34  
35

36  
37 In addition, reviews of complex interventions can be challenging as there is currently no formal  
38 methodology for the synthesis of data from these studies[26]. There is also great variability among  
39 complex interventions in terms of their components and modes of delivery, which makes it even  
40 harder to perform comparative analyses[26]. To overcome this problem, a theoretical framework  
41 could be applied to organize and make sense of the data extracted. In this scoping review, the  
42 Behaviour Change Wheel (BCW) framework[1] was used. The BCW was developed by Michie  
43 and colleagues (2011) as a framework to systematically guide development of interventions using  
44 theory. In the BCW framework, evidence-based principles of behavior change are represented in  
45 the core model of behavior: capability, opportunity, motivation and behavior (COM-B)[27].  
46 COM-B identifies sources of behavior that could bring about a change, which are mapped to nine  
47 intervention functions: *education, persuasion, incentivisation, coercion, training, restriction,*  
48 *environmental restructuring, modeling and enablement.* This approach offers a systematic method  
49  
50  
51  
52  
53  
54  
55  
56  
57

1  
2  
3 of characterizing and analyzing intervention content. As such, in order to capture the breadth of  
4 intervention studies that have been conducted to address PIP, we adopted a scoping review  
5 methodology to identify all relevant information irrespective of study type and quality of their  
6 sources.  
7  
8  
9

10  
11 The aims of our scoping review were thus to: (i) identify intervention elements and within-element  
12 variations that have been adopted to reduce inappropriate prescribing among older adults in the  
13 outpatient setting and (ii) map the intervention elements to the BCW intervention functions for  
14 synthesis. The findings will contribute to the knowledge base to inform development of a  
15 collaborative care intervention to reduce PIP which will be tested in subsequent study phases. To  
16 our knowledge, there are no scoping reviews published that map information on the extent and  
17 nature of care interventions to reduce PIP from both peer-reviewed and grey literature.  
18  
19  
20  
21  
22  
23  
24  
25

## 26 **METHODS**

27  
28  
29 The methodological framework developed by Arksey and O'Malley[2] was adopted, with  
30 application of recommendations proposed by Levac *et al.*[3] and the Joanna Briggs Institute  
31 (JBI)[4]. Five of the six stages outlined in the framework were performed: (i) identifying the  
32 research question; (ii) identifying relevant studies; (iii) selecting studies; (iv) charting data and (v)  
33 summarizing and reporting the results.  
34  
35  
36  
37

### 38 **Identifying the research question**

39  
40  
41 This scoping review was guided by the research question: “What intervention elements have been  
42 adopted to reduce inappropriate prescribing among older adults with multimorbidity in outpatient  
43 care?” The research question was formulated after several rounds of discussion within the study  
44 team (one physician (YYD), two pharmacists (KTT and WA) and three researchers (KY, JQL,  
45 PL). Following recommendation by JBI[4], the research question incorporated the elements  
46 “Population, Concept and Context”.  
47  
48  
49  
50  
51

### 52 **Identifying the relevant studies**



1  
2  
3 We started with five articles that are relevant to our research question and identified the keywords  
4 and MeSH terms that were used to describe these articles. These search terms were then  
5 categorized into “Population”, “Concept” and “Context” and additional keywords and MeSH  
6 terms were identified through searching their synonyms and the MeSH browser respectively. The  
7 final list of search terms can be found in Supplementary File 1.  
8  
9

10  
11  
12 We conducted a pilot search in Ovid MEDLINE. Using the five articles as a test of sensitivity and  
13 specificity, the search strategy was refined after several iterative searches. The eventual search  
14 strategy was then adapted for the remaining databases using the appropriate syntax. The following  
15 six electronic databases were searched on 28 January 2019: (i) PubMed; (ii) CINAHL  
16 (EBSCOHost); (iii) Web of Science; (iv) Embase (Ovid); (v) The Cochrane Library and (vi)  
17 Scopus. Our searches were limited to English Language only with publication date from January  
18 1998 to the date performed (January 2019). The full electronic search strategy for PubMed is  
19 provided in Supplementary File 2.  
20  
21  
22  
23  
24  
25  
26

27 We also performed a search for grey literature in February 2019 in 13 resources, including  
28 ClinicalTrials.gov (<https://clinicaltrials.gov/>), OpenGrey (<http://www.opengrey.eu/>), Science.gov  
29 (<https://www.science.gov/>) and WorldCat (<https://www.worldcat.org/>). In addition, six key  
30 geriatrics and gerontology journals were searched electronically: (i) Journal of the American  
31 Geriatrics Society; (ii) Age and Ageing; (iii) The Journals of Gerontology Series A; (iv) Archives  
32 of Gerontology and Geriatrics (v) BMC Geriatrics and (vi) European Geriatric Medicine. Various  
33 combinations of the following keywords were used: ‘intervention’ and ‘inappropriate prescribing’,  
34 combined with ‘multimorbidity’, ‘comorbidity’ and ‘polypharmacy’. Where possible, language  
35 and publication date limits were imposed (as above).  
36  
37  
38  
39  
40  
41  
42  
43  
44

### 45 **Screening and study selection procedures**

46  
47 The eligibility criteria were developed based on the research question and further refined along the  
48 way as the reviewers become more familiar with the evidence base. Our inclusion criteria were:  
49 (i) original publications that describe an intervention or strategy that addresses PIP in a population  
50 that includes older adults (age  $\geq 65$  years); (ii) intervention was carried out in the outpatient setting;  
51 (iii) physicians were the prescribers and (iv) prescribing was not restricted to specific disease or  
52  
53  
54  
55  
56  
57  
58  
59  
60

1  
2  
3 condition(s) e.g., hypertension, chronic obstructive pulmonary disease or specific medication(s)  
4 e.g., opioids.  
5  
6

7 The screening was conducted in Covidence® and consisted of two stages. The first stage involved  
8 title and abstract screening, which was performed independently by two reviewers (KY and JQL).  
9 Reviewers met at the beginning, midpoint and final stages of the abstract review process to clarify  
10 doubts and establish a common understanding of the inclusion criteria, as recommended by Levac  
11 *et al.*[3]. In the second stage, the same reviewers again reviewed the full text articles  
12 independently, before meeting to discuss and resolve conflicts. A third reviewer (YYD) was  
13 involved in resolving conflicts whenever necessary. During the screening process, systematic  
14 reviews that were relevant to the research question were also identified and their reference lists  
15 were searched to garner additional primary studies for inclusion. The systematic review papers  
16 were not included in data extraction and synthesis.  
17  
18  
19  
20  
21  
22  
23  
24

### 25 **Charting the data**

26  
27  
28 A data charting form was developed and used to extract data from the included studies. The  
29 extracted information included: (i) publication details: author(s), year of publication, country of  
30 origin; (ii) intervention details: study type, participants, description of intervention and (iii) results:  
31 outcome measures. Charting of the first three studies was performed together by the two reviewers  
32 (KY and JQL) to establish a standardized method of extraction. The reviewers then each charted  
33 half of the remaining studies.  
34  
35  
36  
37  
38  
39

### 40 **Collating, summarizing and reporting of results**

41  
42 The first step of data synthesis involved identifying the intervention elements present in each study.  
43 During full text screening of 80 articles, a provisional list of common intervention elements  
44 implemented in the reported studies was identified by the reviewers (e.g., medication reviews,  
45 education and training, case conference, medication reconciliation, etc.) and the list was extended  
46 and refined along the way. Coding of the intervention elements was performed independently by  
47 the two reviewers (KY and JQL), before meeting to compare, discuss and reach a consensus on  
48 the coding.  
49  
50  
51  
52  
53  
54

### 55 **Application of Behaviour Change Framework**

The intervention elements were then mapped to the BCW intervention functions: *education, persuasion, incentivisation, coercion, training, restriction, environmental restructuring, modeling* and *enablement*. The definitions and examples of the BCW intervention functions are outlined in Supplementary File 3. Two reviewers (KY and JQL) performed the mapping independently before discussing and finalizing the synthesis.

## RESULTS

### Study selection and characteristics of included studies

The review selection process is summarized in Figure 1 using a PRISMA flow diagram. The initial search yielded 8204 abstracts after removal of duplicates. After title and abstract screening and full text review, 71 studies were included. Eleven systematic review papers relevant to our research question were identified and searched based on their reference lists, adding another 9 studies. A total of 80 studies were included for data extraction and synthesis (references to the included studies are provided in Supplementary File 4). They comprised 40 interventional studies, 13 observational studies, 13 study protocols, 13 conference abstracts and 1 report. The characteristics of the included studies are summarized in Table 1. The studies originated from 19 countries, with the majority from the United States (n = 25, 32%). More than 60% of the included studies were published in the last five years i.e. 2014 to present.

Table 1. Characteristics of included studies

| Characteristic                      | Frequency Count | Percentage |
|-------------------------------------|-----------------|------------|
| <b>Study Type</b>                   |                 |            |
| Interventional Studies              | 40              | 50.0%      |
| Randomized Controlled Trial         | 17              | 21.3%      |
| Pre-post study                      | 9               | 11.3%      |
| Cluster Randomized Controlled Trial | 7               | 8.8%       |
| Non-randomized trial                | 6               | 7.5%       |
| Randomized Trial                    | 1               | 1.3%       |
| Observational Studies               | 13              | 16.3%      |
| Prospective Cohort Study            | 10              | 12.5%      |
| Retrospective Cohort Study          | 2               | 2.5%       |
| Cross-sectional study               | 1               | 1.3%       |
| <b>Others</b>                       | 27              | 33.8%      |
| Study Protocol                      | 13              | 16.3%      |

|                          |    |       |
|--------------------------|----|-------|
| Conference Abstract      | 13 | 16.3% |
| Report                   | 1  | 1.3%  |
| <b>Publication Year</b>  |    |       |
| 1998 - 2003              | 8  | 10.0% |
| 2004 - 2008              | 8  | 10.0% |
| 2009 - 2013              | 15 | 18.8% |
| 2014 - 2019              | 49 | 61.3% |
| <b>Country of Origin</b> |    |       |
| US & Canada              | 31 | 38.8% |
| UK & Ireland             | 5  | 6.3%  |
| Scandinavia              | 9  | 11.3% |
| Western Europe           | 25 | 31.3% |
| Asia                     | 6  | 7.5%  |
| Australia                | 3  | 3.8%  |
| Others                   | 1  | 1.3%  |

### Intervention elements identified

Included studies identified 14 intervention elements. Within each intervention element, variations were noted and coded separately to capture the differences in which the elements were performed (e.g., medication review performed by pharmacist or physician or both physician and pharmacist). The definitions of the 14 intervention elements are outlined in Tables 2, 3 and 4. *Medication review* was found to be the most frequently adopted intervention element (n=56; 70%), followed by *Training* (n=21; 26.3%), *Tool/instrument(s)* (n=18; 22.5%), *Feedback & audit* (n=15; 18.8%) and *Medication therapy management* (n=14; 17.5%). Of all medication reviews, 70% involved pharmacists (n=39; MR1, 2, 3 and 4), 27% were performed by physicians alone (n=15; MR5) and 2.5% performed by physicians and medical assistants (n=2; MR6). *Case conference* and *Peer support* were the least frequently adopted intervention elements (n=3 and n=2 respectively). Interventions have an average of 2.5 elements, with more than 80% (n=65) consisting of more than one element. The highest number of elements present in a single intervention is eight[28].

### Mapping of intervention elements to BCW intervention functions

The 14 intervention elements were mapped to five of the nine BCW intervention functions, namely *education*, *persuasion*, *training*, *environmental restructuring* and *enablement*. Tables 2, 3 and 4 summarize the 14 intervention elements and their corresponding intervention functions. There were no intervention elements that map to the other 4 intervention functions (*Incentivisation*,

1  
2  
3 *Coercion, Restriction, Modelling*)[1]. *Environmental restructuring* and *enablement* were the two  
4 functions that were most commonly present in the intervention elements (n = 11 and n = 16 out of  
5 24).  
6  
7

### 8 9 Medication review

10 Pharmacist-led medication reviews (MR1), medication reviews conducted by an external team of  
11 pharmacist(s) and/or physician(s) (MR3) and medication reviews conducted by pharmacist(s)  
12 without communicating recommendations to the physician directly (MR4) all contained the same  
13 three functions. Firstly, *persuasion* is the function identified, when a pharmacist's  
14 recommendations were communicated to the physicians, thus prompting them to reconsider their  
15 prescription for the respective patients. *Environmental restructuring* is also present, since  
16 involving the pharmacist changes the social context of the physician[1]. The third function is  
17 *enablement*, where the physicians' means to prescribe appropriately might increase, with the  
18 pharmacist's review of the medications for drug-related problems. The function *persuasion* is  
19 absent in medication reviews that were performed together by pharmacist and physician (MR2) as  
20 they are working side by side, a two-way discourse is more likely to occur when they come to a  
21 decision together making necessary changes and resolving medication-related problems for the  
22 patient. Medication review that is performed solely by the physician (MR5) serves the function of  
23 *enablement*, as it provides an opportunity for them to review and rethink the medications they have  
24 prescribed, after having an overview of the patient's medications and health records. Medication  
25 review that is performed by physician and medical assistant (MR6) serves two functions. Firstly,  
26 involving medical assistant in the medication review process (e.g., brown bag review or  
27 medication reconciliation) changes the social context of the physician, which indicates  
28 *environment restructuring*[1]. Secondly, by providing a complete medication review or  
29 reconciliation lists of medication to the physicians, medical assistants *enabled* them to review and  
30 make changes to patient's medication when necessary.  
31  
32  
33  
34  
35  
36  
37  
38  
39  
40  
41  
42  
43  
44  
45  
46  
47

### 48 Training

49 All three types of training (targeted at pharmacists (TG1), physicians (TG2) and medical assistants  
50 (TG3)) were mapped to the function *training*, as they served to equip healthcare professionals with  
51 practical skills to support the reduction of PIP.  
52  
53  
54

### 55 Tool/Instrument(s)

Tool and instrument(s) have the function of *enablement*, as they served as guidelines to increase the means and capability of prescribers to prescribe more appropriately.

### Feedback & audit

Both types of feedback & audit (feedback only (FA1) and feedback with discussion of improvement strategies (FA2)) serve the function of *persuasion*, since they prompt physicians to prescribe more appropriately through monitoring and feedback of their prescribing behavior. FA2 also served the function of *environmental restructuring*, where having someone to discuss strategies to improve prescribing changed the social context of the physician[1].

Table 2. Descriptions and Examples of Medication Review, Training, Tool/Instrument(s) and Feedback and audit

| Intervention Element | Definition                                                                                                               | Subtypes                                                           | Code | Examples                                                                                                                                                                                                                                                                              | BCW Intervention Functions                                                                                                  |
|----------------------|--------------------------------------------------------------------------------------------------------------------------|--------------------------------------------------------------------|------|---------------------------------------------------------------------------------------------------------------------------------------------------------------------------------------------------------------------------------------------------------------------------------------|-----------------------------------------------------------------------------------------------------------------------------|
| Medication Review    | 'Structured evaluation of patient's medicines with the aim of optimizing medicines use and improving health outcomes'[1] | Pharmacist-led with feedback to physician                          | MR1  | Clinical pharmacists performed drug therapy reviews for patients identified with high risk of polypharmacy and suggested drug therapy changes to the physicians by telephone, fax or in person. Physicians reviewed and endorsed recommendations[2].                                  | <ul style="list-style-type: none"> <li>• Persuasion</li> <li>• Environmental restructuring</li> <li>• Enablement</li> </ul> |
|                      |                                                                                                                          | Performed by pharmacist and physician                              | MR2  | Clinical pharmacist reviewed patient charts to determine patients at greatest risk for MRPs and worked side by side with physicians to consult patient and resolve MRPs[3].                                                                                                           | <ul style="list-style-type: none"> <li>• Environmental restructuring</li> <li>• Enablement</li> </ul>                       |
|                      |                                                                                                                          | Performed by an external team of pharmacist(s) and/or physician(s) | MR3  | A panel of 5 experts (physicians and pharmacists) not affiliated with the MCO or the academic medical center performed a peer review of the drugs to be included in the intervention and their corresponding alternative medications[4].                                              | <ul style="list-style-type: none"> <li>• Persuasion</li> <li>• Environmental restructuring</li> <li>• Enablement</li> </ul> |
|                      |                                                                                                                          | Performed by pharmacist (but not the one conveying feedback)       | MR4  | A clinical pharmacologist performed a thorough medication review of the selected patients, which was sent to the medication consultant. The medication consultant offered a visit at the general practitioner to discuss potential changes to the individual patient's medication[5]. | <ul style="list-style-type: none"> <li>• Persuasion</li> <li>• Environmental restructuring</li> <li>• Enablement</li> </ul> |
|                      |                                                                                                                          | Performed by physician                                             | MR5  | A letter was sent to selected patients to encourage them to make an appointment with their primary care physician for a medication review. Physicians were provided with patient-specific medication management report and clinical practice guidelines for managing polypharmacy[6]. | <ul style="list-style-type: none"> <li>• Enablement</li> </ul>                                                              |
|                      |                                                                                                                          | Performed by physician and medical assistant                       | MR6  | MA performed brown bag review and GPs reviewed the medication systematically using tools (PRISCUS list or MAI) to reduce PIM[7].                                                                                                                                                      | <ul style="list-style-type: none"> <li>• Environmental restructuring</li> <li>• Enablement</li> </ul>                       |
| Training             | Imparting skills required to carry out intervention to improve prescribing[8]                                            | For pharmacists                                                    | TG1  | Pharmacists attended tutorial by the study pharmacist to ensure standardized method of medication review[9].                                                                                                                                                                          | <ul style="list-style-type: none"> <li>• Training</li> </ul>                                                                |
|                      |                                                                                                                          | For physicians                                                     | TG2  | 20 GPs were trained to use STOPP criteria[10].                                                                                                                                                                                                                                        | <ul style="list-style-type: none"> <li>• Training</li> </ul>                                                                |
|                      |                                                                                                                          | For medical assistants                                             | TG3  | MA's were trained to perform brown bag reviews[7].                                                                                                                                                                                                                                    | <ul style="list-style-type: none"> <li>• Training</li> </ul>                                                                |

|                                                                |                            |                                                                                                                          |                                                             |     |                                                                                                                                                                                                                                                                                                       |                                                  |
|----------------------------------------------------------------|----------------------------|--------------------------------------------------------------------------------------------------------------------------|-------------------------------------------------------------|-----|-------------------------------------------------------------------------------------------------------------------------------------------------------------------------------------------------------------------------------------------------------------------------------------------------------|--------------------------------------------------|
| 1<br>2<br>3<br>4<br>5<br>6<br>7                                | Tool/<br>instrument<br>(s) | Checklist/guideline(s)<br>used to identify<br>medication-related<br>problems or measure<br>medication<br>appropriateness | -                                                           | T11 | Pharmacist identified potential MRPs using<br>START/STOPP criteria to be addressed<br>with the provider[11].                                                                                                                                                                                          | • Enablement                                     |
| 8<br>9<br>10<br>11<br>12<br>13<br>14<br>15<br>16               | Feedback &<br>audit        | Monitoring and<br>evaluation of<br>physician's<br>prescribing patterns                                                   | Feedback only                                               | FA1 | Retrospective DUR identified patients at<br>risk of drug injury. Main prescribing GP of<br>identified patient received a personalized<br>feedback letter containing patient-specific<br>information and clinical practice<br>guidelines[12].                                                          | • Persuasion                                     |
| 17<br>18<br>19<br>20<br>21<br>22<br>23<br>24<br>25<br>26<br>27 |                            |                                                                                                                          | Feedback with<br>discussion of<br>improvement<br>strategies | FA2 | A quality improvement tool was used to<br>track PIM prescribing and individualized<br>feedback were mailed to PCPs monthly. A<br>geriatrician and geriatric clinical pharmacist<br>met face to face with each PCP to review<br>his/her first feedback form and discuss<br>improvement strategies[13]. | • Persuasion<br>• Environmental<br>restructuring |

Abbreviations: BCW = Behaviour Change Wheel; MRP = medication-related problem; MCO = managed care organization; MA = medical assistant; GP = general practitioner; PIM = potentially inappropriate medication; DUR = drug utilization review; PCP = primary care provider

## Medication therapy management and Education

Both medication therapy management and education were mapped to the function of *education* as they served to increase patients' knowledge and understanding about their medication regimen and educate healthcare professionals about PIP respectively.

## Shared decision-making, Patient interview, Medication reconciliation and Comprehensive geriatric assessment

Intervention elements including shared decision-making, patient interview, medication reconciliation and comprehensive geriatric assessment performed the function of *enablement* as they increased the means or capability of physicians to prescribe more appropriately by providing physicians with more in-depth and holistic information about the patient.

Table 3. Descriptions and Examples of Medication therapy management, Shared decision-making, Clinical decision support, Education and Patient Interview

| Intervention Element          | Definition                                                                                                                         | Subtypes | Code | Examples                                                                                                                                                                                                                                                                                                                                                                            | BCW Intervention Functions |
|-------------------------------|------------------------------------------------------------------------------------------------------------------------------------|----------|------|-------------------------------------------------------------------------------------------------------------------------------------------------------------------------------------------------------------------------------------------------------------------------------------------------------------------------------------------------------------------------------------|----------------------------|
| Medication therapy management | 'Providing verbal education and training designed to enhance patient understanding and appropriate use of his/her medications'[14] | -        | MTM1 | Patients will be provided with comprehensive counseling and specific adherence strategies (information about medications and administration) by the pharmacist[15].                                                                                                                                                                                                                 | • Education                |
| Shared decision-making        | Narrative based doctor-patient dialogue reflecting treatment targets and priorities of the patient[16]                             | -        | SDM1 | GPs met with patients 3 times within 12 months. First session was aimed at identifying patient's priorities in life (could be non-medical) and carving out treatment targets based on this information. Second session was a "brown bag review". On the third session, GPs discussed with patients goal attainment, changes in medication and treatment targets for the future[16]. | • Enablement               |



|                           |                                                                                                                                                                                                                                            |                                                           |      |                                                                                                                                                                                                                                                                                                                                                                                     |                                                                                                       |
|---------------------------|--------------------------------------------------------------------------------------------------------------------------------------------------------------------------------------------------------------------------------------------|-----------------------------------------------------------|------|-------------------------------------------------------------------------------------------------------------------------------------------------------------------------------------------------------------------------------------------------------------------------------------------------------------------------------------------------------------------------------------|-------------------------------------------------------------------------------------------------------|
| Clinical decision support | ‘Technological applications that provide clinicians, staff, patients or other individuals with knowledge and person-specific information, intelligently filtered or presented at appropriate times, to enhance health and health care’[17] | -                                                         | CDS1 | GP recorded medication and diagnoses in STRIPA and performed structured drug review using the software. STRIPA is a Dutch software-based tool that 1) highlights predictable adverse medication effects, 2) advises safe and appropriate therapy using STOPP/START criteria, 3) monitors for interactions and 4) provides appropriate dosing in accordance with renal function[18]. | <ul style="list-style-type: none"> <li>• Environmental restructuring</li> <li>• Enablement</li> </ul> |
| Education                 | Increasing knowledge or understanding about PIP[8]                                                                                                                                                                                         | For physicians                                            | ED1  | Physicians in the intervention group received: (1) a detailed educational brochure listing PIMs, (2) a list of suggested PIM alternative medications (independently suggested and reviewed by 5 geriatricians and pharmacists not affiliated with the MCOs)[4].                                                                                                                     | <ul style="list-style-type: none"> <li>• Education</li> </ul>                                         |
|                           |                                                                                                                                                                                                                                            | For physicians and nurses                                 | ED2  | PCPs and nurses underwent tutorial on PIMs[19].                                                                                                                                                                                                                                                                                                                                     | <ul style="list-style-type: none"> <li>• Education</li> </ul>                                         |
| Patient Interview         | ‘Asking patient about how, when and why the patient takes each medication, as well as about any adverse reactions, allergies or issues with medication cost the patient may have experienced’[20]                                          | Performed by physician                                    | PI1  | During the consultation, patients were interviewed on drugs currently being taken, dosage and frequency and the condition for which the medication had been prescribed[21].                                                                                                                                                                                                         | <ul style="list-style-type: none"> <li>• Enablement</li> </ul>                                        |
|                           |                                                                                                                                                                                                                                            | Performed by healthcare professional other than physician | PI2  | Patients received a 30-60 min face to face consultation with the pharmacist at the clinic. Prior to the consultation, pharmacist reviewed patient’s medical records. During the consultation, pharmacists interviewed patients for medication history, adherence and knowledge[22].                                                                                                 | <ul style="list-style-type: none"> <li>• Environmental restructuring</li> <li>• Enablement</li> </ul> |

Abbreviations: BCW = Behaviour Change Wheel; MCO = managed care organization; GP = general practitioner; PIM = potentially inappropriate medication; PCP = primary care provider

### Clinical decision support

As an intervention element, clinical decision support served the functions of *environmental restructuring* by providing infrastructural support (changing physical context) and *enablement* by increasing physicians’ means to prescribe appropriately.

### Multidisciplinary team, Case conference and Peer support

Intervention elements including multidisciplinary team, case conference and peer support all performed the functions of *environmental restructuring* and *enablement*. *Environmental restructuring* was present as the involvement of other physicians and healthcare professionals changed the social context of the physician, whereas *enablement* was mapped as support from co-workers increases the physician’s means to prescribe more appropriately.



Table 4. Descriptions and Examples of Medication Reconciliation, Multidisciplinary team, Comprehensive Geriatric Assessment, Case conference and Peer support

| Intervention Element               | Definition                                                                                                                                               | Code | Examples                                                                                                                                                                                                                                                   | BCW Intervention Functions                                                                            |
|------------------------------------|----------------------------------------------------------------------------------------------------------------------------------------------------------|------|------------------------------------------------------------------------------------------------------------------------------------------------------------------------------------------------------------------------------------------------------------|-------------------------------------------------------------------------------------------------------|
| Medication reconciliation          | 'The process of creating the most accurate list possible of all medications a patient is taking — including drug name, dosage, frequency, and route'[23] | MRC1 | HCA reconciled all patient's medications, which patient was instructed to bring in its original packaging[24].                                                                                                                                             | <ul style="list-style-type: none"> <li>• Enablement</li> </ul>                                        |
| Multidisciplinary team             | Involvement of healthcare professionals from more than two disciplines to address PIP in a patient                                                       | MT1  | Patient attended a shared medical appointment co-facilitated by a pharmacist, health psychologist, nurse practitioner, and physician, and consisted of interactive discussions about polypharmacy, adherence, and patients' beliefs about medications[25]. | <ul style="list-style-type: none"> <li>• Environmental restructuring</li> <li>• Enablement</li> </ul> |
| Comprehensive Geriatric Assessment | 'A multidimensional, multidisciplinary process which identifies medical, social and functional needs'[26]                                                | CGA1 | Complete geriatric assessment was carried out by geriatrician at geriatric day clinic[27].                                                                                                                                                                 | <ul style="list-style-type: none"> <li>• Enablement</li> </ul>                                        |
| Case conference                    | Meeting of a multidisciplinary team of healthcare professionals to discuss an individual patient's case or multiple patients' cases[28]                  | CC1  | Two physicians, a pharmacist and a nurse reviewed the list of drugs and the diagnoses of a subgroup of the experimental group in a case conference[28].                                                                                                    | <ul style="list-style-type: none"> <li>• Environmental restructuring</li> <li>• Enablement</li> </ul> |
| Peer support                       | Discussions between physicians for decision-making[29]                                                                                                   | PS1  | GPs engaged in group discussion about their prescribing behaviors facilitated by peer academic detailer[30].                                                                                                                                               | <ul style="list-style-type: none"> <li>• Environmental restructuring</li> <li>• Enablement</li> </ul> |

Abbreviations: BCW = Behaviour Change Wheel; GP = general practitioner; HCA = health care assistant

## DISCUSSION

Our results indicate that more than 80% of the interventions identified were complex with multi-modal approaches that comprise an average of 2.5 elements. This corroborates with past systematic reviews[29,30] that also identified most interventions as being complex. Furthermore, the intervention elements were targeted at various stakeholders. For instance, *Medication therapy management* aims to educate patients, *training* serves to equip healthcare providers with skills to improve prescribing, while *clinical decision support* provides infrastructural support. Taken together, these highlight the fact that PIP is a multi-faceted problem and a multi-prong approaches have been adopted to change behaviours of stakeholders at the patient, healthcare provider and organization levels. *Medication review* is the most frequently adopted intervention element, much more so than *tool/instrument* and *clinical decision support*. It is likely that this is due to PIP is a highly variable problem that varies in accordance with the individual clinical context. The determination of medication appropriateness therefore requires not only theoretical knowledge, but also clinical judgment and experience. As such, the involvement of a pharmacist and physician

1  
2  
3 in the medication review process is crucial for sound decisions to be made to achieve optimal  
4 outcomes for patients.  
5

6  
7 On the other hand, medication reviews are often time-consuming, making it a challenge to  
8 implement them in busy clinical practice[31,32]. While physicians generally appreciated support  
9 from pharmacists, some studies have also noted that collaboration between pharmacists and  
10 physicians requires trust and rapport, which take time to develop[33,34]. Therefore, although  
11 medication review was widely adopted as a strategy to reduce PIP, a systems-oriented approach to  
12 its implementation is needed for it to function as intended. *Case Conference* and *Peer support*  
13 were found to be the least frequently adopted intervention elements. It is likely that physicians  
14 were already seeking advice from peers when they encounter more complex cases, albeit on an  
15 informal and ad-hoc basis. Notably, 13 studies that adopted the element *Shared decision-making*  
16 were all published in the last five years i.e. 2014 to January 2019. This could be attributed to the  
17 shift in recent years towards patient-centered care, where emphasis is placed on prioritizing  
18 individual patient's needs and expectations[35]. This is particularly relevant in the context of PIP  
19 where stopping medications can be challenging for patients and that they tend to heed the advice  
20 of healthcare professionals only if they trust the latter[36]. In order to establish trust, it is essential  
21 for healthcare professionals to consider their concerns, thoughts and expectations.  
22  
23  
24  
25  
26  
27  
28  
29  
30  
31  
32

33  
34 *Environmental restructuring* and *enablement* were the two BCW intervention functions most  
35 frequently mapped to the 14 intervention elements. *Environmental restructuring* constitutes a  
36 change in either the physical or social context[1]. This suggests that inadequate infrastructural and  
37 social support for prescribers was being addressed. *Enablement*, on the other hand, involves  
38 increasing prescribers' opportunities or capabilities to prescribe appropriately through addressing  
39 barriers that limit prescribers' ability to prescribe optimally, such as incomplete information about  
40 patients.  
41  
42  
43  
44  
45  
46

47 Our findings will be useful in informing the development of a care intervention that will undergo  
48 feasibility testing in the second of three phases of the wider project. The anticipated product will  
49 be an effective, feasible and scalable physician-pharmacist collaborative care intervention to  
50 improve prescribing for older adults receiving outpatient care at public hospitals in Singapore.  
51  
52  
53  
54  
55  
56  
57  
58  
59  
60

## Strengths and Limitations

We aimed to achieve methodological rigour by adhering closely to the scoping review framework proposed by Arksey & O'Malley[2] and applying the recommendations outlined by Levac *et al.*[3] and JBI[4]. A comprehensive search in both peer-reviewed and grey literature was performed and the final search strategy was developed after several rounds of iteration. We documented all search iterations attempted and systematic decisions the study team made along the way, in order to retain precise record of how the eventual search strategy was finalized. Following recommendations proposed by JBI, a step-by-step protocol was developed prior to undertaking the scoping review and our research question were clearly outlined in the format of 'Population, Concept, Context'. These steps helped to provide a clear direction and focus throughout the review process. The reviewers also met frequently to clarify doubts, as recommended by Levac *et al.*

Our initial search yielded a substantial number of titles and abstracts, which could suggest that our search strategy lacked specificity. However, given the lack of standardized terms and definitions (e.g., for the concept of 'polypharmacy') available on this subject, a broad array of search terms was used to capture as many studies relevant to our research question as possible. Due to feasibility reasons, language restrictions were imposed during literature search and study selection, which could result in the omission of relevant studies and underrepresentation of available literature. A limit was also placed on the year of publication of included studies, but this was to ensure that interventions identified were relevant to current healthcare contexts. Intervention elements and functions were only coded when explicitly stated or observed. Thus, coding was limited by the extent of intervention and methodological details reported. We also did not perform the sixth stage of the Arksey and O'Malley framework i.e. the consultation exercise. This stage will be replaced by a separate Delphi study, where findings from this scoping review will be presented to a panel of clinical experts to elicit their opinions on the relevance of our findings in local prescribing contexts.

As the intention for conducting our scoping review was to mainly focus on identifying all the intervention elements that have been implemented in the outpatient settings, interactions between intervention elements within an intervention package and the effectiveness or outcomes of these interventions were not examined. It would be interesting to explore the intervention elements that are most often bundled together and the effect these elements have on one another and on the

1  
2  
3 eventual outcome in a separate work. This could provide valuable evidence on the effectiveness  
4 of separate intervention elements when combined.  
5  
6

## 7 8 **CONCLUSION** 9

10 This review represents the first scoping review performed to identify elements of care interventions  
11 that address PIP among older adults in the outpatient setting. The wide range of intervention  
12 elements found were characterized based on the functions they perform using the BCW  
13 intervention functions adapted from Michie *et al*[1]. The findings from this review would thus  
14 provide valuable information and guidance when designing a theory- and evidence-based complex  
15 intervention to reduce PIP. Furthermore, a theoretical framework is applied in the synthesis and  
16 analysis of data, which could be regarded as an adaptation of the scoping review methodology  
17 given that there is currently no formalized approach to data synthesis. Further investigation can be  
18 explored to analyze interactions between different elements within an intervention and how they  
19 influence effectiveness in improving prescribing quality for older patients.  
20  
21  
22  
23  
24  
25  
26  
27  
28  
29  
30

## 31 **REFERENCES** 32

- 33 1 Michie S, van Stralen MM, West R. The behaviour change wheel: A new method for  
34 characterising and designing behaviour change interventions. *Implement Sci* Published  
35 Online First: 2011. doi:10.1186/1748-5908-6-42  
36
- 37 2 Arksey H, O'Malley L. Scoping studies: Towards a methodological framework. *Int J Soc*  
38 *Res Methodol Theory Pract* Published Online First: 2005.  
39 doi:10.1080/1364557032000119616  
40
- 41 3 Levac D, Colquhoun H, O'Brien KK. Scoping studies: Advancing the methodology.  
42 *Implement Sci* Published Online First: 2010. doi:10.1186/1748-5908-5-69  
43
- 44 4 Peters, M., D., J., Godfrey, C., M., McInerney, P., Soares, C., B., Khalil, H., Parker D. The  
45 Joanna Briggs Institute reviewers' manual 2015: Methodology for JBI scoping reviews.  
46 2015. doi:10.1017/CBO9781107415324.004  
47
- 48 5 Masnoon N, Shakib S, Kalisch-Ellett L, *et al*. What is polypharmacy? A systematic review  
49 of definitions. *BMC Geriatr*. 2017. doi:10.1186/s12877-017-0621-2  
50
- 51 6 Qato DM, Wilder J, Schumm LP, *et al*. Changes in Prescription and Over-the-Counter  
52  
53  
54  
55  
56  
57

- 1  
2  
3 Medication and Dietary Supplement Use Among Older Adults in the United States, 2005  
4 vs 2011. *JAMA Intern Med* 2016;**176**:473. doi:10.1001/jamainternmed.2015.8581  
5  
6  
7 Oktora MP, Denig P, Bos JHJ, *et al.* Trends in polypharmacy and dispensed drugs among  
8 adults in the Netherlands as compared to the United States. *PLoS One* 2019;**14**:e0214240.  
9 doi:10.1371/journal.pone.0214240  
10  
11  
12 van den Akker M, Vaes B, Goderis G, *et al.* Trends in multimorbidity and polypharmacy in  
13 the Flemish-Belgian population between 2000 and 2015. *PLoS One* 2019;**14**:e0212046.  
14 doi:10.1371/journal.pone.0212046  
15  
16  
17 Zhang F, Mamtani R, Scott FI, *et al.* Increasing use of prescription drugs in the United  
18 Kingdom. *Pharmacoepidemiol Drug Saf* 2016;**25**:628–36. doi:10.1002/pds.3947  
19  
20  
21 Gallagher P, Barry P, O'Mahony D. Inappropriate prescribing in the elderly. *J Clin Pharm*  
22 *Ther* 2007;**32**:113–21. doi:10.1111/j.1365-2710.2007.00793.x  
23  
24  
25 Moßhammer D, Haumann H, Mörike K, *et al.* Polypharmacy-an Upward Trend with  
26 Unpredictable Effects. *Dtsch Arztebl Int* Published Online First: 2016.  
27 doi:10.3238/arztebl.2016.0627  
28  
29  
30  
31 Dumbreck S, Flynn A, Nairn M, *et al.* Drug-disease and drug-drug interactions: Systematic  
32 examination of recommendations in 12 UK national clinical guidelines. *BMJ* Published  
33 Online First: 2015. doi:10.1136/bmj.h949  
34  
35  
36 Corsonello A, Pedone C, Incalzi R. Age-Related Pharmacokinetic and Pharmacodynamic  
37 Changes and Related Risk of Adverse Drug Reactions. *Curr Med Chem* Published Online  
38 First: 2010. doi:10.2174/092986710790416326  
39  
40  
41 Corsonello A, Abbatecola AM, Fusco S, *et al.* The impact of drug interactions and  
42 polypharmacy on antimicrobial therapy in the elderly. *Clin Microbiol Infect* Published  
43 Online First: 2015. doi:10.1016/j.cmi.2014.09.011  
44  
45  
46 Cho S, Lau SWJ, Tandon V, *et al.* Geriatric Drug Evaluation. *Arch Intern Med*  
47 2011;**171**:937–40. doi:10.1001/archinternmed.2011.152  
48  
49  
50 Maher RL, Hanlon J, Hajjar ER. Clinical consequences of polypharmacy in elderly. *Expert*  
51 *Opin Drug Saf* 2014;**13**:57–65. doi:10.1517/14740338.2013.827660  
52  
53  
54  
55  
56  
57  
58  
59  
60  
61  
62  
63  
64  
65  
66  
67  
68  
69  
70  
71  
72  
73  
74  
75  
76  
77  
78  
79  
80  
81  
82  
83  
84  
85  
86  
87  
88  
89  
90  
91  
92  
93  
94  
95  
96  
97  
98  
99  
100  
101  
102  
103  
104  
105  
106  
107  
108  
109  
110  
111  
112  
113  
114  
115  
116  
117  
118  
119  
120  
121  
122  
123  
124  
125  
126  
127  
128  
129  
130  
131  
132  
133  
134  
135  
136  
137  
138  
139  
140  
141  
142  
143  
144  
145  
146  
147  
148  
149  
150  
151  
152  
153  
154  
155  
156  
157  
158  
159  
160  
161  
162  
163  
164  
165  
166  
167  
168  
169  
170  
171  
172  
173  
174  
175  
176  
177  
178  
179  
180  
181  
182  
183  
184  
185  
186  
187  
188  
189  
190  
191  
192  
193  
194  
195  
196  
197  
198  
199  
200  
201  
202  
203  
204  
205  
206  
207  
208  
209  
210  
211  
212  
213  
214  
215  
216  
217  
218  
219  
220  
221  
222  
223  
224  
225  
226  
227  
228  
229  
230  
231  
232  
233  
234  
235  
236  
237  
238  
239  
240  
241  
242  
243  
244  
245  
246  
247  
248  
249  
250  
251  
252  
253  
254  
255  
256  
257  
258  
259  
260  
261  
262  
263  
264  
265  
266  
267  
268  
269  
270  
271  
272  
273  
274  
275  
276  
277  
278  
279  
280  
281  
282  
283  
284  
285  
286  
287  
288  
289  
290  
291  
292  
293  
294  
295  
296  
297  
298  
299  
300  
301  
302  
303  
304  
305  
306  
307  
308  
309  
310  
311  
312  
313  
314  
315  
316  
317  
318  
319  
320  
321  
322  
323  
324  
325  
326  
327  
328  
329  
330  
331  
332  
333  
334  
335  
336  
337  
338  
339  
340  
341  
342  
343  
344  
345  
346  
347  
348  
349  
350  
351  
352  
353  
354  
355  
356  
357  
358  
359  
360  
361  
362  
363  
364  
365  
366  
367  
368  
369  
370  
371  
372  
373  
374  
375  
376  
377  
378  
379  
380  
381  
382  
383  
384  
385  
386  
387  
388  
389  
390  
391  
392  
393  
394  
395  
396  
397  
398  
399  
400  
401  
402  
403  
404  
405  
406  
407  
408  
409  
410  
411  
412  
413  
414  
415  
416  
417  
418  
419  
420  
421  
422  
423  
424  
425  
426  
427  
428  
429  
430  
431  
432  
433  
434  
435  
436  
437  
438  
439  
440  
441  
442  
443  
444  
445  
446  
447  
448  
449  
450  
451  
452  
453  
454  
455  
456  
457  
458  
459  
460  
461  
462  
463  
464  
465  
466  
467  
468  
469  
470  
471  
472  
473  
474  
475  
476  
477  
478  
479  
480  
481  
482  
483  
484  
485  
486  
487  
488  
489  
490  
491  
492  
493  
494  
495  
496  
497  
498  
499  
500  
501  
502  
503  
504  
505  
506  
507  
508  
509  
510  
511  
512  
513  
514  
515  
516  
517  
518  
519  
520  
521  
522  
523  
524  
525  
526  
527  
528  
529  
530  
531  
532  
533  
534  
535  
536  
537  
538  
539  
540  
541  
542  
543  
544  
545  
546  
547  
548  
549  
550  
551  
552  
553  
554  
555  
556  
557  
558  
559  
560  
561  
562  
563  
564  
565  
566  
567  
568  
569  
570  
571  
572  
573  
574  
575  
576  
577  
578  
579  
580  
581  
582  
583  
584  
585  
586  
587  
588  
589  
590  
591  
592  
593  
594  
595  
596  
597  
598  
599  
600  
601  
602  
603  
604  
605  
606  
607  
608  
609  
610  
611  
612  
613  
614  
615  
616  
617  
618  
619  
620  
621  
622  
623  
624  
625  
626  
627  
628  
629  
630  
631  
632  
633  
634  
635  
636  
637  
638  
639  
640  
641  
642  
643  
644  
645  
646  
647  
648  
649  
650  
651  
652  
653  
654  
655  
656  
657  
658  
659  
660  
661  
662  
663  
664  
665  
666  
667  
668  
669  
670  
671  
672  
673  
674  
675  
676  
677  
678  
679  
680  
681  
682  
683  
684  
685  
686  
687  
688  
689  
690  
691  
692  
693  
694  
695  
696  
697  
698  
699  
700  
701  
702  
703  
704  
705  
706  
707  
708  
709  
710  
711  
712  
713  
714  
715  
716  
717  
718  
719  
720  
721  
722  
723  
724  
725  
726  
727  
728  
729  
730  
731  
732  
733  
734  
735  
736  
737  
738  
739  
740  
741  
742  
743  
744  
745  
746  
747  
748  
749  
750  
751  
752  
753  
754  
755  
756  
757  
758  
759  
760  
761  
762  
763  
764  
765  
766  
767  
768  
769  
770  
771  
772  
773  
774  
775  
776  
777  
778  
779  
780  
781  
782  
783  
784  
785  
786  
787  
788  
789  
790  
791  
792  
793  
794  
795  
796  
797  
798  
799  
800  
801  
802  
803  
804  
805  
806  
807  
808  
809  
810  
811  
812  
813  
814  
815  
816  
817  
818  
819  
820  
821  
822  
823  
824  
825  
826  
827  
828  
829  
830  
831  
832  
833  
834  
835  
836  
837  
838  
839  
840  
841  
842  
843  
844  
845  
846  
847  
848  
849  
850  
851  
852  
853  
854  
855  
856  
857  
858  
859  
860  
861  
862  
863  
864  
865  
866  
867  
868  
869  
870  
871  
872  
873  
874  
875  
876  
877  
878  
879  
880  
881  
882  
883  
884  
885  
886  
887  
888  
889  
890  
891  
892  
893  
894  
895  
896  
897  
898  
899  
900  
901  
902  
903  
904  
905  
906  
907  
908  
909  
910  
911  
912  
913  
914  
915  
916  
917  
918  
919  
920  
921  
922  
923  
924  
925  
926  
927  
928  
929  
930  
931  
932  
933  
934  
935  
936  
937  
938  
939  
940  
941  
942  
943  
944  
945  
946  
947  
948  
949  
950  
951  
952  
953  
954  
955  
956  
957  
958  
959  
960  
961  
962  
963  
964  
965  
966  
967  
968  
969  
970  
971  
972  
973  
974  
975  
976  
977  
978  
979  
980  
981  
982  
983  
984  
985  
986  
987  
988  
989  
990  
991  
992  
993  
994  
995  
996  
997  
998  
999  
1000

- 1  
2  
3 18 Cahir C, Bennett K, Teljeur C, *et al.* Potentially inappropriate prescribing and adverse health  
4 outcomes in community dwelling older patients. *Br J Clin Pharmacol* 2014;**77**:201–10.  
5 doi:10.1111/bcp.12161  
6  
7  
8 19 Peron EP, Gray SL, Hanlon JT. Medication Use and Functional Status Decline in Older  
9 Adults: A Narrative Review. *Am J Geriatr Pharmacother* Published Online First: 2011.  
10 doi:10.1016/j.amjopharm.2011.10.002  
11  
12  
13 20 Wallace E, McDowell R, Bennett K, *et al.* Impact of Potentially Inappropriate Prescribing  
14 on Adverse Drug Events, Health Related Quality of Life and Emergency Hospital  
15 Attendance in Older People Attending General Practice: A Prospective Cohort Study.  
16 *Journals Gerontol Ser A Biol Sci Med Sci* 2017;**72**:271–7. doi:10.1093/gerona/glw140  
17  
18  
19 21 Varga S, Alcusky M, Keith SW, *et al.* Hospitalization rates during potentially inappropriate  
20 medication use in a large population-based cohort of older adults. *Br J Clin Pharmacol*  
21 2017;**83**:2572–80. doi:10.1111/bcp.13365  
22  
23  
24 22 Clyne B, Fitzgerald C, Quinlan A, *et al.* Interventions to address potentially inappropriate  
25 prescribing in primary care: a systematic review of randomised control trials. *Int J Pharm*  
26 *Pract Conf 21st Heal Serv Res Pharm Pract Conf United kingdom* 2015;**23**:8-9.  
27 doi:10.1111/ijpp.12186  
28  
29  
30 23 Scott IA, Pillans PI, Barras M, *et al.* Using EMR-enabled computerized decision support  
31 systems to reduce prescribing of potentially inappropriate medications: a narrative review.  
32 *Ther Adv Drug Saf* 2018;**9**:559–73. doi:http://dx.doi.org/10.1177/2042098618784809  
33  
34  
35 24 Jokanovic N, Tan ECK, van den Bosch D, *et al.* Clinical medication review in Australia: A  
36 systematic review. *Res Soc Adm Pharm* 2016;**12**:384–418.  
37 doi:10.1016/j.sapharm.2015.06.007  
38  
39  
40 25 Riordan DO, Walsh KA, Galvin R, *et al.* The effect of pharmacist-led interventions in  
41 optimising prescribing in older adults in primary care: a systematic review. *SAGE open Med*  
42 2016;**4**:2050312116652568.https://www.ncbi.nlm.nih.gov/pmc/articles/PMC4910534/pdf/  
43 10.1177\_2050312116652568.pdf  
44  
45  
46 26 Craig P. Developing and evaluating complex interventions.  
47 www.mrc.ac.uk/complexinterventionsguidance (accessed 17 Jun 2019).  
48  
49  
50 27 Tombor I, Michie S, Tombor I, *et al.* Methods of Health Behavior Change. In: *Oxford*  
51 *Research Encyclopedia of Psychology*. 2017.  
52  
53  
54  
55  
56  
57  
58  
59  
60



- doi:10.1093/acrefore/9780190236557.013.125
- 28 Gardner AL, Thomas JM, Mecca MC, *et al.* Initiative to Minimize Pharmaceutical Risk in Older Veterans (IMPROVE) Polypharmacy Clinic. *Fed Pract* 2018.
- 29 Johansson T, Abuzahra ME, Keller S, *et al.* Impact of strategies to reduce polypharmacy on clinically relevant endpoints: a systematic review and meta-analysis. *BCP Br J Clin Pharmacol* 2016;**82**:532–48.
- 30 Rankin A, Cadogan CA, Patterson SM, *et al.* Interventions to improve the appropriate use of polypharmacy for older people. *Cochrane Database Syst. Rev.* 2018. doi:10.1002/14651858.CD008165.pub4
- 31 Brandt M, Hallas J, Graabaek T, *et al.* Description of a practice model for pharmacist medication review in a general practice setting. *Pharm Pract (Granada)* 2014;**12**:420.
- 32 Campins L, Serra-Prat M, Gozalo I, *et al.* Randomized controlled trial of an intervention to improve drug appropriateness in community-dwelling polymedicated elderly people. *Fam Pract* 2017;**34**:36–42. doi:10.1093/fampra/cmw073
- 33 Benson H, Lucas C, Kmet W, *et al.* Pharmacists in general practice: a focus on drug-related problems. *Int J Clin Pharm* 2018;**40**:566–72. doi:10.1007/s11096-018-0617-9
- 34 Blakey SA, Hixson-Wallace JA. Clinical and Economic Effects of Pharmacy Services in a Geriatric Ambulatory Clinic. *Pharmacotherapy* 2000;**20**:1198–203. doi:10.1592/phco.20.15.1198.34581
- 35 Reynolds A. Patient-centered Care. *Radiol Technol*; **81**:133–47. <http://www.ncbi.nlm.nih.gov/pubmed/19901351> (accessed 21 Jun 2019).
- 36 Hazen ACM, Zwart DLM, Poldervaart JM, *et al.* Non-dispensing pharmacists' actions and solutions of drug therapy problems among elderly polypharmacy patients in primary care. *Fam Pract* Published Online First: January 2019. doi:10.1093/fampra/cmy114

## REFERENCES CITED IN FIGURES OR TABLES

- 1 Pharmaceutical Care Network. Medication review definition approved - Pharmaceutical Care Network Europe. 2016. <https://www.pcne.org/news/35/medication-review-definition-approved>
- 2 Zarowitz BJ, Stebelsky LA, Muma BK, *et al.* Reduction of high-risk polypharmacy drug combinations in patients in a managed care setting. *Pharmacotherapy* 2005;**25**:1636–45.

1  
2  
3 doi:10.1592/phco.2005.25.11.1636  
4

- 5  
6 3 Harris IM, Westberg SM, Frakes MJ, *et al.* Outcomes of medication therapy review in a  
7 family medicine clinic. *J Am Pharm Assoc* 2009;**49**:623–7.  
8 doi:10.1331/JAPhA.2009.08069  
9  
10  
11 4 Fick DM, Maclean JR, Rodriguez NA, *et al.* A randomized study to decrease the use of  
12 potentially inappropriate medications among community-dwelling older adults in a  
13 southeastern managed care organization. *Am J Manag Care* 2004.  
14  
15 5 Dalin, D. A., Vermehren, C., Jensen, A. K., Unkerskov, J., Reuther, L. Ø., & Andersen JPT.  
16 107 Systematic medication review in general practice—a collaboration between clinical  
17 pharmacology and general practice. 2018;**23**:1–2.  
18  
19 6 Fillit HM, Futterman R, Orland BI, *et al.* Polypharmacy management in medicare managed  
20 care: Changes in prescribing by primary care physicians resulting from a program  
21 promoting medication reviews. *Am J Manag Care* 1999;**5**:587–94.  
22  
23 7 Jäger C, Freund T, Steinhäuser J, *et al.* Impact of a tailored program on the implementation  
24 of evidence-based recommendations for multimorbid patients with polypharmacy in  
25 primary care practices—results of a cluster-randomized controlled trial. *Implement Sci*  
26 2017;**12**:8. doi:10.1186/s13012-016-0535-y  
27  
28 8 Michie S, van Stralen MM, West R. The behaviour change wheel: A new method for  
29 characterising and designing behaviour change interventions. *Implement Sci* Published  
30 Online First: 2011. doi:10.1186/1748-5908-6-42  
31  
32 9 Milos V, Rekman E, Bondesson A, *et al.* Improving the quality of pharmacotherapy in  
33 elderly primary care patients through medication reviews: a randomised controlled study.  
34 *Drugs Aging* 2013;**30**:235–46. doi:10.1007/s40266-013-0057-0  
35  
36 10 Prudence G, Maud C, Mélanie M, *et al.* Optimizing medication use in elderly people in  
37 primary care: Impact of STOPP criteria on inappropriate prescriptions. *Arch Gerontol*  
38 *Geriatr* 2018;**75**:16–9. doi:10.1016/j.archger.2017.10.022  
39  
40 11 Kiel W, Phillips S. Impact of Pharmacist-Conducted Comprehensive Medication Reviews  
41  
42  
43  
44  
45  
46  
47  
48  
49  
50  
51  
52  
53  
54  
55  
56  
57  
58  
59  
60



- 1  
2  
3 for Older Adult Patients to Reduce Medication Related Problems. *Pharmacy* 2017;**6**:2.  
4 doi:10.3390/pharmacy6010002  
5  
6  
7  
8 12 Woodward MC, Streeton CL, Guttman A, *et al.* Polypharmacy management among  
9 Australian veterans: Improving prescribing through the Australian Department of Veterans'  
10 Affairs' prescriber feedback programme. *Intern Med J* 2008;**38**:95–100.  
11 doi:10.1111/j.1445-5994.2007.01453.x  
12  
13  
14  
15 13 Vandenberg AE, Echt K V, Kemp L, *et al.* Academic Detailing with Provider Audit and  
16 Feedback Improve Prescribing Quality for Older Veterans. *J Am Geriatr Soc* 2018;**66**:621–  
17 7. doi:10.1111/jgs.15247  
18  
19  
20  
21 14 Bluml BM. Definition of Medication Therapy Management: Development of  
22 Professionwide Consensus. [www.japha.org](http://www.japha.org) (accessed 6 Jun 2019).  
23  
24  
25 15 Dauphinot V, Jean-Bart E, Krolak-Salmon P, *et al.* A multi-center, randomized, controlled  
26 trial to assess the efficacy of optimization of drug prescribing in an elderly population, at  
27 18 months of follow-up, in the evolution of functional autonomy: the OPTIM study  
28 protocol. *BMC Geriatr* 2017;**17**:195. doi:10.1186/s12877-017-0600-7  
29  
30  
31  
32  
33 16 Schäfer I, Kaduszkiewicz H, Mellert C, *et al.* Narrative medicine-based intervention in  
34 primary care to reduce polypharmacy: results from the cluster-randomised controlled trial  
35 MultiCare AGENDA. *BMJ Open* 2018;**8**:e017653. doi:10.1136/bmjopen-2017-017653  
36  
37  
38  
39 17 The Office of the National Coordinator for Health Information Technology (ONC). Clinical  
40 Decision Support | HealthIT.gov. 2018.[https://www.healthit.gov/topic/safety/clinical-](https://www.healthit.gov/topic/safety/clinical-decision-support)  
41 [decision-support](https://www.healthit.gov/topic/safety/clinical-decision-support)  
42  
43  
44  
45 18 Streit S, Rozsnyai Z, Al B, *et al.* Optimising Pharmacotherapy In the multimorbid elderly  
46 in Primary Care a cluster randomized trial. 2012;:2011.  
47  
48  
49 19 Schmidt-Mende K, Andersen M, Wettermark B, *et al.* Educational intervention on  
50 medication reviews aiming to reduce acute healthcare consumption in elderly patients with  
51 potentially inappropriate medicinesA pragmatic open-label cluster-randomized controlled  
52 trial in primary care. *PDS Pharmacoepidemiol Drug Saf* 2017;**26**:1347–56.  
53  
54  
55  
56  
57  
58  
59  
60

- 1  
2  
3 20 Lauster CD, Srivastava SB. *Fundamental Skills for Patient Care in Pharmacy Practice*.  
4 2014. [www.jblearning.com](http://www.jblearning.com) (accessed 6 Jun 2019).  
5  
6  
7 21 McKinnon M, Townsend J, Cooper J, *et al*. Systematic review and clinical governance in  
8 repeat prescribing in general practice. *Prim Heal Care Res Dev* 2001;**2**:235–40.  
9 doi:10.1191/146342301682157719  
10  
11  
12  
13 22 Tan ECK, Stewart K, Elliott RA, *et al*. Pharmacist consultations in general practice clinics:  
14 the Pharmacists in Practice Study (PIPS). *Res Social Adm Pharm* 2014;**10**:623–32.  
15 doi:10.1016/j.sapharm.2013.08.005  
16  
17  
18  
19 23 Institute for Healthcare Improvement. Institute for Healthcare Improvement: Medication  
20 Reconciliation to Prevent Adverse Drug Events.  
21 <http://www.ihl.org/Topics/ADEsMedicationReconciliation/Pages/default.aspx> (accessed 6  
22 Jun 2019).  
23  
24  
25  
26  
27 24 Muth C, Uhlmann L, Haefeli WE, *et al*. Effectiveness of a complex intervention on  
28 Prioritising Multimедication in Multimorbidity (PRIMUM) in primary care: results of a  
29 pragmatic cluster randomised controlled trial. *BMJ Open* 2018;**8**:e017740.  
30 doi:10.1136/bmjopen-2017-017740  
31  
32  
33  
34  
35 25 Thomas, J., Zapatka, S., Brienza, R., Islam, L., Langerman, S., Mecca, M., ... & Hyson A.  
36 Mastering the art of deprescribing: An interprofessional outpatient polypharmacy program  
37 for older veterans using the shared medical appointment model. *J Am Geriatr Soc* 2014;**;**1–  
38 331.  
39  
40  
41  
42  
43 26 Parker SG, McCue P, Phelps K, *et al*. What is Comprehensive Geriatric Assessment (CGA)?  
44 An umbrella review. *Age Ageing* 2018;**47**:149–55. doi:10.1093/ageing/afx166  
45  
46  
47 27 Frankfort S V, Tulner LR, van Campen JPCM, *et al*. Evaluation of Pharmacotherapy in  
48 Geriatric Patients after Performing Complete Geriatric Assessment at a??Diagnostic Day  
49 Clinic. *Clin Drug Investig* 2006;**26**:169–74. doi:10.2165/00044011-200626030-00007  
50  
51  
52  
53 28 Allard J, Hébert R, Rioux M, *et al*. Efficacy of a clinical medication review on the number  
54 of potentially inappropriate prescriptions prescribed for community-dwelling elderly  
55  
56  
57  
58  
59  
60

people. *C Can Med Assoc J*  
2001;**164**:1291-1296. <https://www.cochranelibrary.com/central/doi/10.1002/central/CN-00326776/full>

- 29 Sinnott C, Mercer SW, Payne RA, *et al.* Improving medication management in multimorbidity: development of the Multimorbidity Collaborative Medication Review And DEcision Making (MY COMRADE) intervention using the Behaviour Change Wheel. *Implement Sci* 2015;**10**:132. doi:10.1186/s13012-015-0322-1
- 30 Rognstad S, Brekke M, Gjelstad S, *et al.* Potentially Inappropriate Prescribing to Older Patients: Criteria, Prevalence and an Intervention to Reduce It: The Prescription Peer Academic Detailing ( Rx- PAD) Study - A Cluster-Randomized, Educational Intervention in Norwegian General Practice. *Basic Clin Pharmacol Toxicol* 2018;**123**:380–91. doi:10.1111/bcpt.13040

## FOOTNOTE

**Contributors:** KY and JQL conducted the scoping review, participated in data extraction and synthesis, and wrote the first draft of the paper for submission. JQL is the corresponding author and has taken the primary responsibility for communication with the journal during the manuscript submission, peer review and publication process, and has ensured that all the journal's administrative requirements, such as providing details of authorship, and gathering conflict of interest forms and statements, are properly completed. YYD, KTT, WA and PL provided specific content clinical expertise to inform the discussion and implications of the study results (from the perspective of geriatrician, pharmacist and researcher). YLM was the study librarian on the study and contributed to the search strategy as well as draft and review of the methods of the manuscript. All seven authors reviewed the accuracy and integrity of the work.

**Funding:** Intramural Grant Award (GERI1622) from Geriatric Education and Research Institute, Singapore

**Competing interests:** None declared.

**Provenance and peer review:** Not commissioned; externally peer reviewed.

1  
2  
3 **Data sharing statement:** Readers interested in using our database for specific purposes related  
4 to their respective research are invited to do so by contacting the first author through their  
5 corresponding email address.  
6  
7  
8  
9  
10  
11  
12  
13  
14  
15  
16  
17  
18  
19  
20  
21  
22  
23  
24  
25  
26  
27  
28  
29  
30  
31  
32  
33  
34  
35  
36  
37  
38  
39  
40  
41  
42  
43  
44  
45  
46  
47  
48  
49  
50  
51  
52  
53  
54  
55  
56  
57  
58  
59  
60

For peer review only

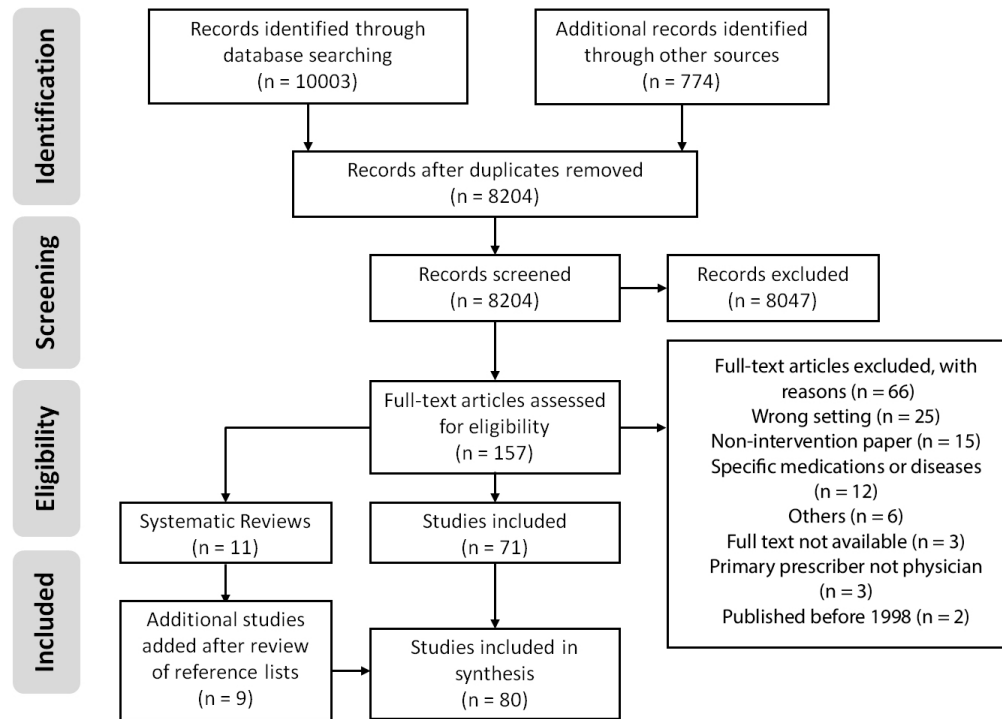

Figure 1. PRISMA flow diagram of study selection process.

225x164mm (150 x 150 DPI)

1  
2  
3  
4  
5  
6  
7  
8  
9  
10  
11  
12  
13  
14  
15  
16  
17  
18  
19  
20  
21  
22  
23  
24  
25  
26  
27  
28  
29  
30  
31  
32  
33

| Research Question: What <u>intervention elements</u> ( <i>Concept (1)</i> ) have been adopted to <u>reduce inappropriate prescribing</u> ( <i>Concept (2)</i> ) among <u>older adults</u> ( <i>Population (1)</i> ) with <u>multimorbidity</u> ( <i>Population (2)</i> ) in <u>outpatient care</u> ( <i>Context</i> )? |                                                                                                                                                                                                                                              |                                          |                                                                                                                                                                                                             |                                                                                                                                                                                                                                                                                                                     |                                                                                                              |
|------------------------------------------------------------------------------------------------------------------------------------------------------------------------------------------------------------------------------------------------------------------------------------------------------------------------|----------------------------------------------------------------------------------------------------------------------------------------------------------------------------------------------------------------------------------------------|------------------------------------------|-------------------------------------------------------------------------------------------------------------------------------------------------------------------------------------------------------------|---------------------------------------------------------------------------------------------------------------------------------------------------------------------------------------------------------------------------------------------------------------------------------------------------------------------|--------------------------------------------------------------------------------------------------------------|
|                                                                                                                                                                                                                                                                                                                        | <b>Population (1)<br/>Older adults*</b>                                                                                                                                                                                                      | <b>Population (2)<br/>Multimorbidity</b> | <b>Concept (1)<br/>Interventions</b>                                                                                                                                                                        | <b>Concept (2)<br/>Reduce inappropriate prescribing</b>                                                                                                                                                                                                                                                             | <b>Context<br/>Outpatient care</b>                                                                           |
| MeSH Terms                                                                                                                                                                                                                                                                                                             | Aged                                                                                                                                                                                                                                         | Comorbidity<br>Multimorbidity            | Medication Reconciliation<br>Patient Care Management<br>Case management<br>Drug Utilization Review<br>Guideline Adherence<br>Decision Support Systems, Clinical                                             | Inappropriate Prescribing<br>Polypharmacy<br>Potentially Inappropriate Medication List<br>Deprescriptions<br>Drug Prescriptions<br>Practice Patterns, Physicians'                                                                                                                                                   | Ambulatory Care<br>Outpatient Clinics, Hospital<br>Community Health Centers<br>Primary Health Care           |
| Key Words                                                                                                                                                                                                                                                                                                              | Aged<br>Elderly<br>Senior<br>Seniors<br>Older person<br>Older persons<br>Older people<br>Older adult<br>Older adults<br>Older patient<br>Older patients<br>Older<br>population<br>Older subject<br>Older subjects<br>Geriatric<br>Geriatrics | Comorbidity<br>Multimorbidity            | Intervention<br>Interventions<br>Implementation<br>Strategy<br>Strategies<br>Behavior change technique<br>Medication review<br>Medication reviews<br>Medication management<br>Medication therapy management | Prescribing<br>Prescription<br>Prescriptions<br>Medication<br>Medications<br>Medicine<br>Medicines<br>Drug prescription<br>Drug prescriptions<br>Inappropriate prescribing<br>Deprescribing<br>Physician practice pattern<br>Physician practice patterns<br>Clinical practice pattern<br>Clinical practice patterns | Outpatient<br>Ambulatory Care<br>Clinic<br>Clinics<br>Primary Care<br>Primary Healthcare<br>General Practice |

34 \* Search terms under Population (1) were removed after several iterative searches to increase the breadth of our search. However, we specified under our eligibility criteria to include studies as  
35 long as they involved adults above the age of 65.  
36  
37  
38  
39  
40  
41  
42  
43  
44  
45  
46

### PubMed Search Strategy

Search (((Comorbidity[MeSH Terms]) OR (Multimorbidity[MeSH Terms]) OR "Polypharmacy"[Mesh])) OR (((comorbidity[Title/Abstract] OR multimorbidity[Title/Abstract] OR polypharmacy[Title/Abstract])) OR (comorbidity[Text Word] OR multimorbidity[Text Word] OR polypharmacy[Text Word])) AND (((("Medication Reconciliation"[Mesh] OR "Patient Care Management"[Mesh] OR "Case Management"[Mesh] OR "Drug Utilization Review"[Mesh] OR "Guideline Adherence"[Mesh] OR "Decision Support Systems, Clinical"[Mesh])) OR (((intervention[Title/Abstract] OR interventions[Title/Abstract] OR implementation[Title/Abstract] OR strategy[Title/Abstract] OR strategies[Title/Abstract] OR medication review[Title/Abstract] OR medication reviews[Title/Abstract] OR medication management[Title/Abstract] OR medication therapy management[Title/Abstract] OR behavior change technique[Title/Abstract])) OR (intervention[Text Word] OR interventions[Text Word] OR implementation[Text Word] OR strategy[Text Word] OR strategies[Text Word] OR medication review[Text Word] OR medication reviews[Text Word] OR medication management[Text Word] OR medication therapy management[Text Word] OR behavior change technique[Text Word])))) AND (((("Inappropriate Prescribing"[Mesh] OR "Potentially Inappropriate Medication List"[Mesh] OR "Deprescriptions"[Mesh] OR "Drug Prescriptions"[Mesh] OR "Practice Patterns, Physicians"[Mesh])) OR (((prescribing[Title/Abstract] OR prescription[Title/Abstract] OR prescriptions[Title/Abstract] OR medication[Title/Abstract] OR medications[Title/Abstract] OR medicine[Title/Abstract] OR medicines[Title/Abstract] OR drug prescription[Title/Abstract] OR drug prescriptions[Title/Abstract] OR inappropriate prescribing[Title/Abstract] OR deprescribing[Title/Abstract] OR physician practice pattern[Title/Abstract] OR physician practice patterns[Title/Abstract] OR clinical practice pattern[Title/Abstract] OR clinical practice patterns[Title/Abstract])) OR (prescribing[Text Word] OR prescription[Text Word] OR prescriptions[Text Word] OR medication[Text Word] OR medications[Text Word] OR medicine[Text Word] OR medicines[Text Word] OR drug prescription[Text Word] OR drug prescriptions[Text Word] OR inappropriate prescribing[Text Word] OR deprescribing[Text Word] OR physician practice pattern[Text Word] OR physician practice patterns[Text Word] OR clinical practice pattern[Text Word] OR clinical practice patterns[Text Word])))) AND (((("Ambulatory Care"[Mesh] OR "Outpatient Clinics, Hospital"[Mesh] OR "Community Health Centers"[Mesh] OR "Primary Health Care"[Mesh])) OR (((Outpatient[Title/Abstract] OR Ambulatory Care[Title/Abstract] OR Clinic[Title/Abstract] OR Clinics[Title/Abstract] OR Primary Care[Title/Abstract] OR Primary Healthcare[Title/Abstract] OR General Practice[Title/Abstract])) OR (Outpatient[Text Word] OR Ambulatory Care[Text Word] OR Clinic[Title/Abstract] OR Clinics[Text Word] OR Primary Care[Text Word] OR Primary Healthcare[Text Word] OR General Practice[Text Word])))) AND (("1998/01/01"[PDat] : "2019/12/31"[PDat]) AND English[lang])

## BCW intervention function definitions and examples

| Intervention Function              | Definition                                                                                                                                                                  | Example of intervention function                                                                                                                |
|------------------------------------|-----------------------------------------------------------------------------------------------------------------------------------------------------------------------------|-------------------------------------------------------------------------------------------------------------------------------------------------|
| <b>Education</b>                   | Increasing knowledge or understanding                                                                                                                                       | Providing information to promote healthy eating                                                                                                 |
| <b>Persuasion</b>                  | Using communication to induce positive or negative feelings or stimulate action                                                                                             | Using imagery to motivate increases in physical activity                                                                                        |
| <b>Incentivisation</b>             | Creating an expectation of reward                                                                                                                                           | Using prize draws to induce attempts to stop smoking                                                                                            |
| <b>Coercion</b>                    | Creating an expectation of punishment or cost                                                                                                                               | Raising the financial cost to reduce excessive alcohol consumption                                                                              |
| <b>Training</b>                    | Imparting skills                                                                                                                                                            | Advanced driver training to increase safe driving                                                                                               |
| <b>Restriction</b>                 | Using rules to reduce the opportunity to engage in the target behaviour (or to increase the target behaviour by reducing the opportunity to engage in competing behaviours) | Prohibiting sales of solvents to people under 18 to reduce use for intoxication                                                                 |
| <b>Environmental restructuring</b> | Changing the physical or social context                                                                                                                                     | Providing on-screen prompts for GPs to ask about smoking behaviour                                                                              |
| <b>Modelling</b>                   | Providing an example for people to aspire to or imitate                                                                                                                     | Using TV drama scenes involving safe sex practices to increase condom use                                                                       |
| <b>Enablement</b>                  | Increasing means/reducing barriers to increase capability (beyond education and training) or opportunity (beyond environmental restructuring)                               | Behavioral support for smoking cessation, medication for cognitive deficits, surgery to reduce obesity, prostheses to promote physical activity |

Taken from: Michie S, Atkins L, West R. *The Behavior Change Wheel: A Guide to Designing Interventions*. London, UK: Silverback Publishing 2014.



## List of Included Studies

1. Allard J, Hébert R, Rioux M, Asselin J, Voyer L. Efficacy of a clinical medication review on the number of potentially inappropriate prescriptions prescribed for community-dwelling elderly people. *Canadian Medical Association Journal*. 2001;164(9):1291-6.
2. Benson H, Lucas C, Kmet W, Benrimoj SI, Williams K. Pharmacists in general practice: a focus on drug-related problems. *International Journal of Clinical Pharmacy*. 2018 1;40(3):566-72.
3. Blakey SA, Hixson-Wallace JA. Clinical and economic effects of pharmacy services in a geriatric ambulatory clinic. *Pharmacotherapy: The Journal of Human Pharmacology and Drug Therapy*. 2000;20(10):1198-203.
4. Brandt M, Hallas J, Graabæk T, Pottgård A. Description of a practice model for pharmacist medication review in a general practice setting. *Pharmacy Practice*. 2014;12(3).
5. Bregnhøj L, Thirstrup S, Kristensen MB, Bjerrum L, Sonne J. Combined intervention programme reduces inappropriate prescribing in elderly patients exposed to polypharmacy in primary care. *European journal of clinical pharmacology*. 2009 1;65(2):199-207.
6. Brett M, Graham KL. When less is more: teaching the art and science of deprescribing to address polypharmacy in primary care [abstract]. *Journal of general internal medicine* 2018 1; 33: S750.
7. Campins L, Serra-Prat M, Gózaló I, López D, Palomera E, Agustí C, Cabré M. Randomized controlled trial of an intervention to improve drug appropriateness in community-dwelling polymedicated elderly people. *Family practice*. 2017 1;34(1):36-42.
8. Cardwell K, Clyne B, Moriarty F, Wallace E, Fahey T, Boland F, McCullagh L, Clarke S, Finnigan K, Daly M, Barry M. Supporting prescribing in Irish primary care: protocol for a non-randomised pilot study of a general practice pharmacist (GPP) intervention to optimise prescribing in primary care. *Pilot and feasibility studies*. 2018;4(1):122.
9. Chan DC, Chen JH, Wen CJ, Chiu LS, Wu SC. Effectiveness of the medication safety review clinics for older adults prescribed multiple medications. *Journal of the Formosan Medical Association*. 2014 1;113(2):106-13.
10. Chiu Y, Lin G, Wu T. By implementing of medication reconciliation to improve the medication safety of patients with polypharmacy issues [abstract]. *ACCP Global Conference on Clinical Pharmacy*. 2018;P. 230.
11. Christensen DB, Roth M, Trygstad T, Byrd J. Evaluation of a pilot medication therapy management project within the North Carolina State Health Plan. *Journal of the American Pharmacists Association*. 2007 1;47(4):471-83.
12. Clyne B, Bradley MC, Hughes C, Fahey T, Lapane KL. Electronic prescribing and other forms of technology to reduce inappropriate medication use and polypharmacy in older people: a review of current evidence. *Clinics in geriatric medicine*. 2012 1;28(2):301-22.
13. Conway S, Smith E. Comprehensive medication management within primary care office of patient-centered medical home model [abstract]. *Pharmacotherapy*. 2017;137(12):E215.
14. Dalin DA, Vermehren C, Jensen AK, Unkerskov J, Reuther LØ, Andersen JP. 107 Systematic medication review in general practice—a collaboration between clinical pharmacology and general practice [abstract].
15. Dauphinot V, Jean-Bart E, Krolak-Salmon P, Mouchoux C. A multi-center, randomized, controlled trial to assess the efficacy of optimization of drug prescribing in an elderly population, at 18 months of follow-up, in the evolution of functional autonomy: the OPTIM study protocol. *BMC geriatrics*. 2017 1;17(1):195.
16. Esmaily HM, Silver I, Shiva S, Gargani A, Maleki-Dizaji N, Al-Maniri A, Wahlstrom R. Can rational prescribing be improved by an outcome-based educational approach? A randomized trial completed in Iran. *Journal of Continuing Education in the Health Professions*. 2010;30(1):11-8.

17. Fick DM, Maclean JR, Rodriguez NA, Short L, Heuvel RV, Waller JL, Rogers RL. A randomized study to decrease the use of potentially inappropriate medications among community-dwelling older adults in a southeastern managed care organization. *Am J Manag Care*. 2004 1;10(11):761-8.
18. Fillit HM, Futterman R, Orland BI, Chim T, Susnow L, Picariello GP, Scheye EC, Spoeri RK, Roglieri JL, Warburton SW. Polypharmacy management in Medicare managed care: changes in prescribing by primary care physicians resulting from a program promoting medication reviews. *Am J Manag Care*. 1999 1;5(5):587-94.
19. Frankfort SV, Tulner LR, van Campen JP, Koks CH, Beijnen JH. Evaluation of pharmacotherapy in geriatric patients after performing complete geriatric assessment at a diagnostic day clinic. *Clinical drug investigation*. 2006 1;26(3):169-74.
20. Gibert P, Cabaret M, Moulis M, Bosson JL, Boivin JE, Chanoine S, Allenet B, Bedouch P, Gavazzi G. Optimizing medication use in elderly people in primary care: Impact of STOPP criteria on inappropriate prescriptions. *Archives of gerontology and geriatrics*. 2018 1;75:16-9.
21. Gómez MA, Villafaina A, Hernández J, Salgado RM, González MÁ, Rodríguez J, Concha MM, Tarrío A, Gervasini G, Carrillo JA. Promoting appropriate drug use through the application of the Spanish drug-related problem classification system in the primary care setting. *Annals of Pharmacotherapy*. 2009;43(2):339-46.
22. Harris IM, Westberg SM, Frakes MJ, Van Vooren JS. Outcomes of medication therapy review in a family medicine clinic. *Journal of the American Pharmacists Association*. 2009 1;49(5):623-7.
23. Hasler S, Senn O, Rosemann T, Neuner-Jehle S. Effect of a patient-centered drug review on polypharmacy in primary care patients: study protocol for a cluster-randomized controlled trial. *Trials*. 2015 Dec;16(1):380.
24. Hazen AC, Zwart DL, Poldervaart JM, de Gier JJ, de Wit NJ, de Bont AA, Bouvy ML. Non-dispensing pharmacists' actions and solutions of drug therapy problems among elderly polypharmacy patients in primary care. *Family practice*. 2019;36(5):544-51.
25. Hoffman J, Gleiberman S, Stern D, Osterweil D. Impact of a Pharmacist in a Specialized Ambulatory Care Geriatric Setting [abstract]. *Journal of the American Geriatrics Society*. 2014;62:B136.
26. Hsu YM, Hsu LZ, Huang CH, Hsu SL, Chien SY. PHP57 Clinical Effects of Pharmacist Interventions for Polypharmacy in a Geriatric Clinic in Taiwan [abstract]. *Value in Health*. 2012 1;15(7):A619.
27. Jäger C, Freund T, Steinhäuser J, Stock C, Krisam J, Kaufmann-Kolle P, Wensing M, Szecsenyi J. Impact of a tailored program on the implementation of evidence-based recommendations for multimorbid patients with polypharmacy in primary care practices—results of a cluster-randomized controlled trial. *Implementation Science*. 2017;12(1):8.
28. Khera S, Abbasi M, Dabravolskaj J, Sadowski CA, Makhinova T, Lee H. Integrated primary care medication management process for older adults with frailty [abstract]. *Journal of the American Geriatrics Society*. 2018 1;66: S51-S52.
29. Kiel WJ, Phillips SW. Impact of pharmacist-conducted comprehensive medication reviews for older adult patients to reduce medication related problems. *Pharmacy*. 2018;6(1):2.
30. Rodondi N. Optimising thERapy to Prevent Avoidable Hospital admissions in the multimorbid older people. *ClinicalTrials.gov*. 2017.
31. Kwint HF, Mertens BJ, Bouvy ML. Impact of deprescribing as part of clinical medication review on polypharmacy of older patients in an integrated primary care setting [abstract]. *International Journal Of Clinical Pharmacy*. 2017 1;39(4): 969.
32. LaBella S, Li G, Barnes K, Matthews D, Beatty S. Measuring the impact of an interdisciplinary polypharmacy clinic within a patient-centered medical home [abstract]. *Journal of the American Pharmacists Association*. 2014:144

- 1  
2  
3  
4  
5  
6  
7  
8  
9  
10  
11  
12  
13  
14  
15  
16  
17  
18  
19  
20  
21  
22  
23  
24  
25  
26  
27  
28  
29  
30  
31  
32  
33  
34  
35  
36  
37  
38  
39  
40  
41  
42  
43  
44  
45  
46  
47  
48  
49  
50  
51  
52  
53  
54  
55  
56  
57  
58  
59  
60
33. González ML, Martin MF, Girones MZ, Hernández MC. PS-080 Drug related problems identified through medication review in elderly patients in primary healthcare [poster]. *EAHP*. 2016;PS-080.
  34. Lampela P, Hartikainen S, Lavikainen P, Sulkava R, Huupponen R. Effects of medication assessment as part of a comprehensive geriatric assessment on drug use over a 1-year period. *Drugs & Aging*. 2010 1;27(6):507-21.
  35. Lea SC, Watts KL, Davis NA, Panayiotou B, Bankart MJ, Arora A, Chambers R. The potential clinical benefits of medicines optimisation through comprehensive geriatric assessment, carried out by secondary care geriatricians, in a general practice care setting in North Staffordshire, UK: a feasibility study. *BMJ Open*. 2017 1;7(9):e015278.
  36. Leendertse AJ, de Koning GHP, Goudswaard AN, *et al*. Preventing hospital admissions by reviewing medication (PHARM) in primary care: an open controlled study in an elderly population. *J Clin Pharm Ther* 2013;38:379–87. doi:10.1111/jcpt.12069
  37. Lenander C, Bondesson Å, Viberg N, Jakobsson U, Beckman A, Midlöv P. Effects of an intervention (SÄKLÄK) on prescription of potentially inappropriate medication in elderly patients. *Family practice*. 2017;34:213-8.
  38. Lenander C, Elfsson B, Danielsson B, Midlöv P, Hasselström J. Effects of a pharmacist-led structured medication review in primary care on drug-related problems and hospital admission rates: a randomized controlled trial. *Scandinavian Journal of Primary Health Care*. 2014 1;32(4):180-6.
  39. Lin HW, Lin CH, Chang CK, Chou CY, Yu IW, Lin CC, Li TC, Li CI, Hsieh YW. Economic outcomes of pharmacist-physician medication therapy management for polypharmacy elderly: A prospective, randomized, controlled trial. *Journal of the Formosan Medical Association*. 2018 1;117(3):235-43.
  40. Linton A, Bacon TA, Trice S, Devine J, Cottrell L, McGinnis TJ, McAllister EB. Results from a mailed promotion of medication reviews among Department of Defense beneficiaries receiving 10 or more chronic medications. *Journal of Managed Care Pharmacy*. 2010;16(8):578-92.
  41. Jungo KT, Rozsnyai Z, Mantelli S, Floriani C, Löwe AL, Lindemann F, Schwab N, Meier R, Elloumi L, Huibers CJ, Sallevelt BT. 'Optimising Pharmacotherapy In the multimorbid elderly in primary Care: the OPTICA trial. *ClinicalTrials*, gov. 2019.
  42. Greiver M, Dahrouge S, O'Brien P, Manca D, Lussier MT, Wang J, Burge F, Grandy M, Singer A, Twohig M, Moineddin R. Improving care for elderly patients living with polypharmacy: protocol for a pragmatic cluster randomized trial in community-based primary care practices in Canada. *Implementation Science*. 2019 1;14(1):55.
  43. Zarowitz BJ, Stebelsky LA, Muma BK, Romain TM, Peterson EL. Reduction of high-risk polypharmacy drug combinations in patients in a managed care setting. *Pharmacotherapy: The Journal of Human Pharmacology and Drug Therapy*. 2005;25(11):1636-45.
  44. Woodward MC, Streeton CL, Guttman A, Killer GT, Peck RW. Polypharmacy management among Australian veterans: improving prescribing through the Australian Department of Veterans' Affairs' prescriber feedback programme. *Internal Medicine Journal*. 2008;38(2):95-100.
  45. Willeboordse F, Schellevis FG, Chau SH, Hugtenburg JG, Elders PJ. The effectiveness of optimised clinical medication reviews for geriatric patients: Opti-Med a cluster randomised controlled trial. *Family Practice*. 2017 1;34(4):437-45.
  46. White C, Hughes-Stricklett A. The impact of a pharmacy resident geriatric clinic [abstract]. *Pharmacotherapy*. 2013 1;33(10): E254.
  47. Wessell AM, Nietert PJ, Jenkins RG, Nemeth LS, Ornstein SM. Inappropriate medication use in the elderly: results from a quality improvement project in 99 primary care practices. *The American Journal of Geriatric Pharmacotherapy*. 2008 1;6(1):21-7.

- 1
  - 2
  - 3
  - 4
  - 5
  - 6
  - 7
  - 8
  - 9
  - 10
  - 11
  - 12
  - 13
  - 14
  - 15
  - 16
  - 17
  - 18
  - 19
  - 20
  - 21
  - 22
  - 23
  - 24
  - 25
  - 26
  - 27
  - 28
  - 29
  - 30
  - 31
  - 32
  - 33
  - 34
  - 35
  - 36
  - 37
  - 38
  - 39
  - 40
  - 41
  - 42
  - 43
  - 44
  - 45
  - 46
  - 47
  - 48
  - 49
  - 50
  - 51
  - 52
  - 53
  - 54
  - 55
  - 56
  - 57
  - 58
  - 59
  - 60
48. Weiss BD, Brega AG, LeBlanc WG, Mabachi NM, Barnard J, Albright K, Cifuentes M, Brach C, West DR. Improving the effectiveness of medication review: guidance from the health literacy universal precautions toolkit. *The Journal of the American Board of Family Medicine*. 2016 1;29(1):18-23.
49. Vanderman AJ, Moss JM, Bryan III WE, Sloane R, Jackson GL, Hastings SN. Evaluating the impact of medication safety alerts on prescribing of potentially inappropriate medications for older veterans in an ambulatory care setting. *Journal of Pharmacy Practice*. 2017;30(1):82-8.
50. Touchette DR, Masica AL, Dolor RJ, Schumock GT, Choi YK, Kim Y, Smith SR. Safety-focused medication therapy management: a randomized controlled trial. *Journal of the American Pharmacists Association*. 2012 1;52(5):603-12.
51. Thomas J, Zapatka S, Brienza R, Islam L, Langerman S, Mecca M, Niehoff K, Hyson A. Mastering the art of deprescribing: An interprofessional outpatient polypharmacy program for older veterans using the shared medical appointment model: D106 [abstract]. *Journal of the American Geriatrics Society*. 2014;62.
52. Taylor CT, Byrd DC, Krueger K. Improving primary care in rural Alabama with a pharmacy initiative. *American Journal of Health-System Pharmacy*. 2003 1;60(11):1123-9.
53. Tan EC, Stewart K, Elliott RA, George J. Pharmacist consultations in general practice clinics: the Pharmacists in Practice Study (PIPS). *Research in Social and Administrative Pharmacy*. 2014 1;10(4):623-32.
54. Tamblyn R, Huang A, Perreault R, Jacques A, Roy D, Hanley J, McLeod P, Laprise R. The medical office of the 21st century (MOXXI): effectiveness of computerized decision-making support in reducing inappropriate prescribing in primary care. *Canadian Medical Association Journal*. 2003 16;169(6):549-56.
55. Stefanovic SM, Jankovic SM. Knowledge of the pharmacological profile of a patient improves the quality of prescribing, the outcomes of treatment, and the utilization of health services in primary health care. *European Journal of Clinical Pharmacology*. 2011 1;67(11):1091.
56. Vandenberg AE, Echt KV, Kemp L, McGwin G, Perkins MM, Mirk AK. Academic detailing with provider audit and feedback improve prescribing quality for older veterans. *Journal of the American Geriatrics Society*. 2018;66(3):621-7.
57. Souag, A. Elderly Appropriate Treatment in Primary Care (EAT) (TAPAGE). ClinicalTrials.gov. 2017.
58. Sönnichsen A, Trampisch US, Rieckert A, Piccoliori G, Vögele A, Flamm M, Johansson T, Esmail A, Reeves D, Löffler C, Höck J. Polypharmacy in chronic diseases—reduction of inappropriate medication and adverse drug events in older populations by electronic decision support (PRIMA-eDS): study protocol for a randomized controlled trial. *Trials*. 2016 1;17(1):57.
59. Soendergaard B, Kirkeby B, Dinsen C, Herborg H, Kjellberg J, Staehr P. Drug-related problems in general practice: results from a development project in Denmark. *Pharmacy World and Science*. 2006 1;28(2):61-4.
60. Shim YW, Chua SS, Wong HC, Alwi S. Collaborative intervention between pharmacists and physicians on elderly patients: a randomized controlled trial. *Therapeutics and Clinical Risk Management*. 2018;14:1115.
61. Sellors J, Kaczorowski J, Sellors C, Dolovich L, Woodward C, Willan A, Goeree R, Cosby R, Trim K, Sebaldt R, Howard M. A randomized controlled trial of a pharmacist consultation program for family physicians and their elderly patients. *Canadian Medical Association Journal*. 2003 8;169(1):17-22.
62. Schmidt-Mende K, Andersen M, Wettermark B, Hasselström J. Educational intervention on medication reviews aiming to reduce acute healthcare consumption in elderly patients with potentially inappropriate medicines—A pragmatic open-label cluster-randomized controlled trial in primary care. *Pharmacoepidemiology and Drug Safety*. 2017;26(11):1347-56.



- 1  
2  
3  
4  
5  
6  
7  
8  
9  
10  
11  
12  
13  
14  
15  
16  
17  
18  
19  
20  
21  
22  
23  
24  
25  
26  
27  
28  
29  
30  
31  
32  
33  
34  
35  
36  
37  
38  
39  
40  
41  
42  
43  
44  
45  
46  
47  
48  
49  
50  
51  
52  
53  
54  
55  
56  
57  
58  
59  
60
63. Schäfer I, Kaduszkiewicz H, Mellert C, Löffler C, Mortsiefer A, Ernst A, Stolzenbach CO, Wiese B, Abholz HH, Scherer M, van den Bussche H. Narrative medicine-based intervention in primary care to reduce polypharmacy: results from the cluster-randomised controlled trial MultiCare AGENDA. *BMJ Open*. 2018 1;8(1):e017653.
  64. Roth MT, Ivey JL, Esserman DA, Crisp G, Kurz J, Weinberger M. Individualized medication assessment and planning: optimizing medication use in older adults in the primary care setting. *Pharmacotherapy: The Journal of Human Pharmacology and Drug Therapy*. 2013;33(8):787-97.
  65. Ros JJ, Koekkoek TJ, Kalf A, van den Bemt PM, Van Kan HJ. Impact of joint consultation by a clinical pharmacist and a clinical geriatrician to improve inappropriate prescribing for elderly patients. *European Journal of Hospital Pharmacy*. 2017 1;24(1):26-30.
  66. Rognstad S, Brekke M, Gjelstad S, Straand J, Fetveit A. Potentially Inappropriate Prescribing to Older Patients: Criteria, Prevalence and an Intervention to Reduce It: The Prescription Peer Academic Detailing (Rx-PAD) Study—A Cluster-Randomized, Educational Intervention in Norwegian General Practice. *Basic & Clinical Pharmacology & Toxicology*. 2018;123(4):380-91.
  67. Raschi E, Piccinni C, Signoretta V, Lionello L, Bonezzi S, Delfino M, Di Candia L, Di Castri L, Pieraccini F, Carati D, Poluzzi E. Clinically important drug–drug interactions in poly-treated elderly outpatients: a campaign to improve appropriateness in general practice. *British Journal of Clinical Pharmacology*. 2015;80(6):1411-20.
  68. Price M, Davies I, Rusk R, Lesperance M, Weber J. Applying STOPP guidelines in primary care through electronic medical record decision support: randomized control trial highlighting the importance of data quality. *JMIR Medical Informatics*. 2017;5(2):e15.
  69. Prados-Torres A, del Cura-González I, Prados-Torres D, López-Rodríguez JA, Leiva-Fernández F, Calderón-Larrañaga A, López-Verde F, Gimeno-Feliu LA, Escortell-Mayor E, Pico-Soler V, Sanz-Cuesta T. Effectiveness of an intervention for improving drug prescription in primary care patients with multimorbidity and polypharmacy: study protocol of a cluster randomized clinical trial (Multi-PAP project). *Implementation Science*. 2017;12(1):54.
  70. Nuez CR, González M, Martínez G, Gómez M, Roca M, Solera C, Mañé B, Ramírez RM, Gutiérrez C, Acezat J, Rodríguez D. A person centred approach for reducing drug burden in complex patients with multimorbidity[abstract]. *International Journal of Integrated Care (IJIC)*. 2016 2;16(6).
  71. Muth C, Uhlmann L, Haefeli WE, Rochon J, van den Akker M, Perera R, Güthlin C, Beyer M, Oswald F, Valderas JM, Knottnerus JA. Effectiveness of a complex intervention on Prioritising Multimедication in Multimorbidity (PRIMUM) in primary care: results of a pragmatic cluster randomised controlled trial. *BMJ Open*. 2018 1;8(2):e017740.
  72. Martinez J. Inappropriate Prescription in Elderly and Polypharmacy Patients in Primary Care (PHARM-PC) Trial (PHARM-PC). *ClinicalTrials.gov*.2016
  73. Rosenthal G.E. Randomized Controlled Trial of Enhanced Pharmacy Care in Older Veteran Outpatients. *ClinicalTrials.gov*.2009
  74. Muth C, Trampisch H. Application for an Electronic Medication Management Support System (AdAM). *ClinicalTrials.gov*. 2018.
  75. Monane M, Matthias DM, Nagle BA, Kelly MA. Improving prescribing patterns for the elderly through an online drug utilization review intervention: a system linking the physician, pharmacist, and computer. *JAMA*. 1998 14;280(14):1249-52.
  76. Milos V, Rekman E, Bondesson Å, Eriksson T, Jakobsson U, Westerlund T, Midlöv P. Improving the quality of pharmacotherapy in elderly primary care patients through medication reviews: a randomised controlled study. *Drugs & Aging*. 2013 1;30(4):235-46.
  77. Gardner AL, Thomas JM, Mecca MC, Hyson A, Niehoff KM, Jeffery S, Sellinger J, Brienza R. Initiative to Minimize Pharmaceutical Risk in Older Veterans (IMPROVE) Polypharmacy Clinic. *Federal Practitioner*. 2018;35(11):40.

- 1  
2  
3 78. McKinnon M, Townsend J, Cooper J, Hunt B, Patel J. Systematic review and clinical  
4 governance in repeat prescribing in general practice. *Primary Health Care Research &*  
5 *Development*. 2001;2(4):235-40.  
6  
7 79. McCarthy C, Clyne B, Corrigan D, Boland F, Wallace E, Moriarty F, Fahey T, Hughes C,  
8 Gillespie P, Smith SM. Supporting prescribing in older people with multimorbidity and  
9 significant polypharmacy in primary care (SPPiRE): a cluster randomised controlled trial  
10 protocol and pilot. *Implementation Science*. 2017;12(1):99.  
11  
12 80. Mak K, Kiesrth B. Implementation and evaluation of a pilot pharmacist-conducted medication  
13 therapy management service for polypharmacy patients in a managed care setting. *American*  
14 *Pharmacist Association*. 2010; 50(2): 234.  
15  
16  
17  
18  
19  
20  
21  
22  
23  
24  
25  
26  
27  
28  
29  
30  
31  
32  
33  
34  
35  
36  
37  
38  
39  
40  
41  
42  
43  
44  
45  
46  
47  
48  
49  
50  
51  
52  
53  
54  
55  
56  
57  
58  
59  
60

For peer review only

## Preferred Reporting Items for Systematic reviews and Meta-Analyses extension for Scoping Reviews (PRISMA-ScR) Checklist

| SECTION                           | ITEM | PRISMA-ScR CHECKLIST ITEM                                                                                                                                                                                                                                                                                  | REPORTED ON PAGE #   |
|-----------------------------------|------|------------------------------------------------------------------------------------------------------------------------------------------------------------------------------------------------------------------------------------------------------------------------------------------------------------|----------------------|
| <b>TITLE</b>                      |      |                                                                                                                                                                                                                                                                                                            |                      |
| Title                             | 1    | Identify the report as a scoping review.                                                                                                                                                                                                                                                                   | 1                    |
| <b>ABSTRACT</b>                   |      |                                                                                                                                                                                                                                                                                                            |                      |
| Structured summary                | 2    | Provide a structured summary that includes (as applicable): background, objectives, eligibility criteria, sources of evidence, charting methods, results, and conclusions that relate to the review questions and objectives.                                                                              | 2                    |
| <b>INTRODUCTION</b>               |      |                                                                                                                                                                                                                                                                                                            |                      |
| Rationale                         | 3    | Describe the rationale for the review in the context of what is already known. Explain why the review questions/objectives lend themselves to a scoping review approach.                                                                                                                                   | 3-4                  |
| Objectives                        | 4    | Provide an explicit statement of the questions and objectives being addressed with reference to their key elements (e.g., population or participants, concepts, and context) or other relevant key elements used to conceptualize the review questions and/or objectives.                                  | 5                    |
| <b>METHODS</b>                    |      |                                                                                                                                                                                                                                                                                                            |                      |
| Protocol and registration         | 5    | Indicate whether a review protocol exists; state if and where it can be accessed (e.g., a Web address); and if available, provide registration information, including the registration number.                                                                                                             | NA                   |
| Eligibility criteria              | 6    | Specify characteristics of the sources of evidence used as eligibility criteria (e.g., years considered, language, and publication status), and provide a rationale.                                                                                                                                       | 6                    |
| Information sources*              | 7    | Describe all information sources in the search (e.g., databases with dates of coverage and contact with authors to identify additional sources), as well as the date the most recent search was executed.                                                                                                  | 6                    |
| Search                            | 8    | Present the full electronic search strategy for at least 1 database, including any limits used, such that it could be repeated.                                                                                                                                                                            | Supplementary File 2 |
| Selection of sources of evidence† | 9    | State the process for selecting sources of evidence (i.e., screening and eligibility) included in the scoping review.                                                                                                                                                                                      | 5-7                  |
| Data charting process‡            | 10   | Describe the methods of charting data from the included sources of evidence (e.g., calibrated forms or forms that have been tested by the team before their use, and whether data charting was done independently or in duplicate) and any processes for obtaining and confirming data from investigators. | 7                    |
| Data items                        | 11   | List and define all variables for which data were sought and any assumptions and simplifications made.                                                                                                                                                                                                     | 7                    |
| Critical appraisal of individual  | 12   | If done, provide a rationale for conducting a critical appraisal of included sources of evidence; describe                                                                                                                                                                                                 | NA                   |

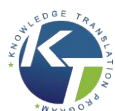

| SECTION                                       | ITEM | PRISMA-ScR CHECKLIST ITEM                                                                                                                                                                       | REPORTED ON PAGE #  |
|-----------------------------------------------|------|-------------------------------------------------------------------------------------------------------------------------------------------------------------------------------------------------|---------------------|
| sources of evidence§                          |      | the methods used and how this information was used in any data synthesis (if appropriate).                                                                                                      |                     |
| Synthesis of results                          | 13   | Describe the methods of handling and summarizing the data that were charted.                                                                                                                    | 7-8                 |
| <b>RESULTS</b>                                |      |                                                                                                                                                                                                 |                     |
| Selection of sources of evidence              | 14   | Give numbers of sources of evidence screened, assessed for eligibility, and included in the review, with reasons for exclusions at each stage, ideally using a flow diagram.                    | Figure 1            |
| Characteristics of sources of evidence        | 15   | For each source of evidence, present characteristics for which data were charted and provide the citations.                                                                                     | Table 1 (pages 8-9) |
| Critical appraisal within sources of evidence | 16   | If done, present data on critical appraisal of included sources of evidence (see item 12).                                                                                                      | NA                  |
| Results of individual sources of evidence     | 17   | For each included source of evidence, present the relevant data that were charted that relate to the review questions and objectives.                                                           | 8-14                |
| Synthesis of results                          | 18   | Summarize and/or present the charting results as they relate to the review questions and objectives.                                                                                            | 8-14                |
| <b>DISCUSSION</b>                             |      |                                                                                                                                                                                                 |                     |
| Summary of evidence                           | 19   | Summarize the main results (including an overview of concepts, themes, and types of evidence available), link to the review questions and objectives, and consider the relevance to key groups. | 14-15               |
| Limitations                                   | 20   | Discuss the limitations of the scoping review process.                                                                                                                                          | 16                  |
| Conclusions                                   | 21   | Provide a general interpretation of the results with respect to the review questions and objectives, as well as potential implications and/or next steps.                                       | 17                  |
| <b>FUNDING</b>                                |      |                                                                                                                                                                                                 |                     |
| Funding                                       | 22   | Describe sources of funding for the included sources of evidence, as well as sources of funding for the scoping review. Describe the role of the funders of the scoping review.                 | 24                  |

JB1 = Joanna Briggs Institute; PRISMA-ScR = Preferred Reporting Items for Systematic reviews and Meta-Analyses extension for Scoping Reviews.

\* Where *sources of evidence* (see second footnote) are compiled from, such as bibliographic databases, social media platforms, and Web sites.

† A more inclusive/heterogeneous term used to account for the different types of evidence or data sources (e.g., quantitative and/or qualitative research, expert opinion, and policy documents) that may be eligible in a scoping review as opposed to only studies. This is not to be confused with *information sources* (see first footnote).

‡ The frameworks by Arksey and O'Malley (6) and Levac and colleagues (7) and the JBI guidance (4, 5) refer to the process of data extraction in a scoping review as data charting.

§ The process of systematically examining research evidence to assess its validity, results, and relevance before using it to inform a decision. This term is used for items 12 and 19 instead of "risk of bias" (which is more applicable to systematic reviews of interventions) to include and acknowledge the various sources of evidence that may be used in a scoping review (e.g., quantitative and/or qualitative research, expert opinion, and policy document).

From: Tricco AC, Lillie E, Zarin W, O'Brien KK, Colquhoun H, Levac D, et al. PRISMA Extension for Scoping Reviews (PRISMA-ScR): Checklist and Explanation. *Ann Intern Med.* 2018;169:467–473. doi: 10.7326/M18-0850.

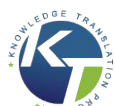

St. Michael's

Inspired Care.  
Inspiring Science.

For peer review only - <http://bmjopen.bmj.com/site/about/guidelines.xhtml>



# BMJ Open

## Intervention Elements to Reduce Inappropriate Prescribing for Older Adults with Multimorbidity Receiving Outpatient Care: A Scoping Review

|                                 |                                                                                                                                                                                                                                                                                                                                                                                                                                                            |
|---------------------------------|------------------------------------------------------------------------------------------------------------------------------------------------------------------------------------------------------------------------------------------------------------------------------------------------------------------------------------------------------------------------------------------------------------------------------------------------------------|
| Journal:                        | <i>BMJ Open</i>                                                                                                                                                                                                                                                                                                                                                                                                                                            |
| Manuscript ID                   | bmjopen-2020-039543.R1                                                                                                                                                                                                                                                                                                                                                                                                                                     |
| Article Type:                   | Original research                                                                                                                                                                                                                                                                                                                                                                                                                                          |
| Date Submitted by the Author:   | 14-Jul-2020                                                                                                                                                                                                                                                                                                                                                                                                                                                |
| Complete List of Authors:       | Lee, Jia Qi; Geriatric Education and Research Institute Ltd, Ying, Kate; Geriatric Education and Research Institute Ltd Lun, Penny; Geriatric Education and Research Institute Ltd Tan, Keng Teng; Tan Tock Seng Hospital, Pharmacy Ang, Wendy; Changi General Hospital, Pharmacy Munro, Yasmin; Lee Kong Chian School of Medicine, Medical Library Ding, Yew; Tan Tock Seng Hospital, Geriatric Medicine; Geriatric Education and Research Institute Ltd, |
| <b>Primary Subject Heading</b>: | Geriatric medicine                                                                                                                                                                                                                                                                                                                                                                                                                                         |
| Secondary Subject Heading:      | General practice / Family practice, Health services research, Patient-centred medicine                                                                                                                                                                                                                                                                                                                                                                     |
| Keywords:                       | GERIATRIC MEDICINE, PRIMARY CARE, Quality in health care < HEALTH SERVICES ADMINISTRATION & MANAGEMENT                                                                                                                                                                                                                                                                                                                                                     |
|                                 |                                                                                                                                                                                                                                                                                                                                                                                                                                                            |

SCHOLARONE™  
Manuscripts



I, the Submitting Author has the right to grant and does grant on behalf of all authors of the Work (as defined in the below author licence), an exclusive licence and/or a non-exclusive licence for contributions from authors who are: i) UK Crown employees; ii) where BMJ has agreed a CC-BY licence shall apply, and/or iii) in accordance with the terms applicable for US Federal Government officers or employees acting as part of their official duties; on a worldwide, perpetual, irrevocable, royalty-free basis to BMJ Publishing Group Ltd ("BMJ") its licensees and where the relevant Journal is co-owned by BMJ to the co-owners of the Journal, to publish the Work in this journal and any other BMJ products and to exploit all rights, as set out in our [licence](#).

The Submitting Author accepts and understands that any supply made under these terms is made by BMJ to the Submitting Author unless you are acting as an employee on behalf of your employer or a postgraduate student of an affiliated institution which is paying any applicable article publishing charge ("APC") for Open Access articles. Where the Submitting Author wishes to make the Work available on an Open Access basis (and intends to pay the relevant APC), the terms of reuse of such Open Access shall be governed by a Creative Commons licence – details of these licences and which [Creative Commons](#) licence will apply to this Work are set out in our licence referred to above.

Other than as permitted in any relevant BMJ Author's Self Archiving Policies, I confirm this Work has not been accepted for publication elsewhere, is not being considered for publication elsewhere and does not duplicate material already published. I confirm all authors consent to publication of this Work and authorise the granting of this licence.

1  
2  
3 **Intervention Elements to Reduce Inappropriate Prescribing for Older Adults with**  
4 **Multimorbidity Receiving Outpatient Care: A Scoping Review**  
5  
6

7 Jia Qi Lee<sup>1</sup>, Kate Ying<sup>1</sup>, Penny Lun<sup>1</sup>, Keng Teng Tan<sup>2</sup>, Wendy Ang<sup>3</sup>, Yasmin Lynda Munro<sup>4</sup>, Yew  
8 Yoong Ding<sup>1,5</sup>  
9  
10

11 **Author affiliations:**  
12  
13

14 <sup>1</sup> Geriatric Education and Research Institute, Singapore  
15

16 <sup>2</sup> Department of Pharmacy, Tan Tock Seng Hospital, Singapore  
17  
18

19 <sup>3</sup> Department of Pharmacy, Changi General Hospital, Singapore  
20  
21

22 <sup>4</sup> Medical Library, Lee Kong Chian School of Medicine, Singapore  
23  
24

25 <sup>5</sup> Geriatric Medicine, Tan Tock Seng Hospital, Singapore  
26  
27  
28

29 **Author responsible for correspondence:**  
30

31 Lee Jia Qi, Research Officer, Geriatric Education and Research Institute, 2 Yishun Central,  
32 Singapore 768024, Email: jiaqi.lee@u.duke.nus.edu  
33  
34

35 **Word count**  
36

37 Main Text: 3794  
38

39 Abstract: 295  
40  
41  
42

43 **Tables and figures**  
44

45  
46 No. of tables: 4  
47

48 No. of figures: 1  
49  
50  
51  
52  
53  
54  
55  
56  
57  
58  
59  
60

## Intervention Elements to Reduce Inappropriate Prescribing for Older Adults with Multimorbidity Receiving Outpatient Care: A Scoping Review

### ABSTRACT

**Objective:** Polypharmacy occurs in approximately 30% of older adults aged 65 years or more, particularly among those with multimorbidity. With polypharmacy, there is an associated risk of potentially inappropriate prescribing (PIP). The aims of this scoping review were to (i) identify the intervention elements that have been adopted to reduce PIP in the outpatient setting and (ii) determine the Behaviour Change Wheel (BCW) intervention functions performed by each of the identified intervention elements.

**Design:** Scoping Review

**Data sources:** PubMed, Cumulative Index to Nursing and Allied Health Literature (CINAHL), EMBASE, Web of Science and Cochrane Library databases, grey literature sources, six key geriatrics journals and the reference lists of review papers.

**Study selection:** All studies reporting an intervention or strategy that addressed PIP in the older adult population (age  $\geq 65$ ) with multimorbidity in the outpatient setting and in which the primary prescriber is the physician.

**Data extraction:** Data extracted from the included studies can be broadly categorized into (i) publication details (ii) intervention details and (iii) results. This was followed by data synthesis and analysis based on the BCW framework.

**Results:** Of 8204 studies yielded, 80 studies were included in the final analysis and 14 intervention elements were identified. An average of two to three elements were adopted in each intervention. The three most used intervention elements were medication review (70%), training (26.3%) and tool/instrument(s) (22.5%). Among medication reviews, 60% involved pharmacists. The 14 intervention elements were mapped onto five intervention functions: “education”, “persuasion”, “training”, “environmental restructuring” and “enablement”.

**Conclusion:** PIP is a multi-faceted problem that involves multiple stakeholders. Interventions to address PIP have multiple elements targeting the behaviour of different stakeholders. The intervention elements and their corresponding functions identified in this scoping review will inform the design of complex interventions that aim to reduce PIP.

**Keywords:** elderly; geriatrics; polypharmacy; ambulatory care; behaviour change wheel; intervention components

## ARTICLE SUMMARY

### Strength and limitations of this study:

- This is the first attempt to map the extent and nature of information on this topic in both peer-reviewed and grey literature.
- The results from this review can be used to guide the design of complex interventions to reduce PIP among older adults.
- Consultation with experts and stakeholders was initiated at the time of writing and will be reported in a separate work.
- The effectiveness or outcomes of interventions were not examined in the present study.
- This review may not be fully comprehensive due to the time period and language restrictions imposed during literature search and study selection.

### ABBREVIATIONS

ADE, Adverse Drug Events; BCW, Behaviour Change Wheel; CINAHL, Cumulative Index to Nursing and Allied Health Literature; COM-B, 'Capability', 'Opportunity', 'Motivation' and 'Behaviour'; DUR, Drug Utilization Review; GP, General Practitioner; HCA; Health Care Assistant; JBI, Joanna Briggs Institute; MA, Medical Assistant; MAI, Medication Appropriateness Index; MCO, Managed Care Organization; MeSH, Medical Subject Headings; MRP, Medication-Related Problem; PCP, Primary Care Provider; PIP, Potentially Inappropriate Prescribing; PRISMA, Preferred Reporting Items for Systematic Reviews and Meta-Analyses; START, Screening Tool to Alert to Right Treatment; STOPP, Screening Tool of Older Person's Potentially Inappropriate Prescriptions; STRIPA, Systematic Tool to Reduce Inappropriate Prescribing-Assistant

## INTRODUCTION

Polypharmacy, commonly defined as the use of five or more medications daily, is a widespread phenomenon among older adults as they tend to develop multiple chronic diseases or multimorbidity with age[1]. Polypharmacy among community-dwelling older people is a global problem, with its prevalence ranging from 11.5% among rural residents of China to 43.3% in Australia according to a 2019 World Health Organization report[2]. Furthermore, the prevalence of polypharmacy shows an increasing trend worldwide[3]. A longitudinal, cohort study of over 2,000 community-dwelling older adults aged 62 to 85 years in the US showed that the prevalence of polypharmacy increased from 30.6% to 35.8% between 2005 and 2011[4]. Similar trends have also been observed in other countries, including the UK, Netherlands, Belgium, Japan, South Korea and New Zealand[5–10]. Polypharmacy is a cause for concern as it predisposes older adults to potentially inappropriate prescribing (PIP), which occurs when medicines prescribed confer more harm than benefit[11]. Current clinical guidelines are designed to be disease-specific, and many do not take into consideration drug-disease and drug-drug interactions in their treatment recommendations[12,13]. In older adults, adverse drug events (ADE) are made even more unpredictable by age-related changes in pharmacokinetics and pharmacodynamics[14,15]. This problem is further exacerbated by the fact that clinical trials often exclude older adults, which means approved drug doses may not be appropriate for geriatric patients[16].

It is estimated that up to 50% of older adults receive at least one unnecessary medication, and the incidence of PIP increases significantly with polypharmacy[17,18]. Older adults with at least 2 PIP indicators based on the Screening Tool of Older Person's Potentially Inappropriate Prescriptions (STOPP) criteria were shown to be twice as likely to experience ADE[19]. Apart from drug-related problems, older adults with PIP also reported poorer functional status, reduced health-related quality of life and increased health care utilization, including more frequent emergency department visits and hospitalizations[20–22]. Given the high prevalence of PIP and its adverse outcomes, it is therefore imperative for appropriate measures to be implemented to improve prescribing for older adults. With rising concern on suboptimal prescribing both internationally and at home, a three-phase implementation research project aiming to reduce PIP among older adults is underway. The first phase includes a literature review to examine interventions to reduce PIP among older adults with multimorbidity receiving outpatient care.

1  
2  
3 While there have been several systematic reviews performed to explore interventions that address  
4 PIP, these reviews included a limited number of studies as they focused only on specific study  
5 types (e.g., randomized controlled trials[23]) or specific intervention types (e.g., computerized  
6 decision support systems[24] and pharmacist-led medication reviews[25]). Moreover, systematic  
7 reviews often restrict inclusion to studies that fulfill a certain standard of methodological rigour  
8 and reporting, which might result in the omission of a significant number of potentially relevant  
9 studies[26].

10  
11  
12 In addition, reviews of complex interventions can be challenging as there is currently no formal  
13 methodology for the synthesis of data from these studies[27]. There is also great variability among  
14 complex interventions in terms of their components and modes of delivery, which makes it even  
15 harder to perform comparative analyses[27]. To overcome this problem, a theoretical framework  
16 could be applied to organize and make sense of the data extracted. In this scoping review, the  
17 Behaviour Change Wheel (BCW) framework[28] was used. The BCW was developed by Michie  
18 and colleagues (2011) as a framework to systematically guide the development of interventions  
19 using theory. In the BCW framework, evidence-based principles of behavior change are  
20 represented in the core model of behavior: capability, opportunity, motivation and behavior  
21 (COM-B)[29]. COM-B identifies sources of behavior that could bring about a change, which are  
22 mapped to nine intervention functions: *education, persuasion, incentivisation, coercion, training,*  
23 *restriction, environmental restructuring, modeling and enablement.* This approach offers a  
24 systematic method of characterizing and analyzing intervention content. As such, in order to  
25 capture the breadth of intervention studies that have been conducted to address PIP, we adopted a  
26 scoping review methodology to identify all relevant information irrespective of study type and  
27 quality of their sources.

28  
29  
30 The aims of our scoping review were thus to: (i) identify intervention elements and within-element  
31 variations that have been adopted to reduce inappropriate prescribing among older adults in the  
32 outpatient setting and (ii) map the intervention elements to the BCW intervention functions for  
33 synthesis. The findings will contribute to the knowledge base to inform the development of a  
34 collaborative care intervention to reduce PIP, which will be tested in subsequent study phases. To  
35 our knowledge, there have been no scoping reviews published that map information on the extent  
36 and nature of care interventions to reduce PIP from both peer-reviewed and grey literature.



## METHODS

The methodological framework developed by Arksey and O'Malley[30] was adopted, with application of recommendations proposed by Levac *et al.*[31] and the Joanna Briggs Institute (JBI)[32]. Five of the six stages outlined in the framework were performed: (i) identifying the research question; (ii) identifying relevant studies; (iii) selecting studies; (iv) charting data and (v) summarizing and reporting the results.

### Identifying the research question

This scoping review was guided by the research question: "What intervention elements have been adopted to reduce inappropriate prescribing among older adults with multimorbidity in outpatient care?" The research question was formulated after several rounds of discussion within the study team (one physician (YYD), two pharmacists (KTT and WA) and three researchers (KY, JQL, PL). Following recommendation by JBI[32], the research question incorporated the elements "Population, Concept and Context".

### Identifying the relevant studies

We started with five articles that are relevant to our research question and identified the keywords and Medical Subject Headings (MeSH) terms that were used to describe these articles. These search terms were then categorized into "Population", "Concept" and "Context" and additional keywords and MeSH terms were identified through searching their synonyms and the MeSH browser respectively. The final list of search terms can be found in Supplementary File 1.

We conducted a pilot search in Ovid MEDLINE. Using the five articles as a test of sensitivity and specificity, the search strategy was refined after several iterative searches. The eventual search strategy was then adapted for the remaining databases using the appropriate syntax. The following six electronic databases were searched on 28 January 2019: (i) PubMed; (ii) Cumulative Index to Nursing and Allied Health Literature (CINAHL); (iii) Web of Science; (iv) Embase (Ovid); (v) The Cochrane Library and (vi) Scopus. Our searches were limited to English Language only with publication date from January 1998 to the date performed (January 2019). The full electronic search strategy for PubMed is provided in Supplementary File 2.

1  
2  
3 We also performed a search for grey literature in February 2019 in 13 resources, including  
4 ClinicalTrials.gov (<https://clinicaltrials.gov/>), OpenGrey (<http://www.opengrey.eu/>), Science.gov  
5 (<https://www.science.gov/>) and WorldCat (<https://www.worldcat.org/>). In addition, six key  
6 geriatrics and gerontology journals were searched electronically: (i) Journal of the American  
7 Geriatrics Society; (ii) Age and Ageing; (iii) The Journals of Gerontology Series A; (iv) Archives  
8 of Gerontology and Geriatrics (v) BMC Geriatrics and (vi) European Geriatric Medicine. Various  
9 combinations of the following keywords were used: ‘intervention’ and ‘inappropriate prescribing’,  
10 combined with ‘multimorbidity’, ‘comorbidity’ and ‘polypharmacy’. Where possible, language  
11 and publication date limits were imposed (as above).  
12  
13  
14  
15  
16  
17  
18  
19

### 20 **Screening and study selection procedures**

21  
22  
23 The eligibility criteria were developed based on the research question and further refined along the  
24 way as the reviewers became more familiar with the evidence base. Our inclusion criteria were:  
25 (i) original publications that describe an intervention or strategy that addresses PIP in a population  
26 that includes older adults (age  $\geq 65$  years); (ii) intervention was carried out in the outpatient setting;  
27 (iii) physicians were the prescribers and (iv) prescribing was not restricted to specific diseases or  
28 conditions e.g., hypertension, chronic obstructive pulmonary disease or specific medications e.g.,  
29 opioids.  
30  
31  
32  
33  
34  
35

36 The screening was conducted in Covidence® and consisted of two stages. The first stage involved  
37 title and abstract screening, which was performed independently by two reviewers (KY and JQL).  
38 Reviewers met at the beginning, middle and end stages of the abstract review process to clarify  
39 doubts and establish a common understanding of the inclusion criteria, as recommended by Levac  
40 *et al.*[31]. In the second stage, the same reviewers similarly reviewed the full text articles  
41 independently, before meeting to discuss and resolve conflicts. A third reviewer (YYD) was  
42 involved in resolving conflicts where necessary. During the screening process, systematic reviews  
43 that were relevant to the research question were also identified and their reference lists were  
44 searched to garner additional primary studies for inclusion. The systematic review papers were not  
45 included in data extraction and synthesis.  
46  
47  
48  
49  
50  
51  
52  
53

### 54 **Charting the data**

1  
2  
3 A data charting form was developed and used to extract data from the included studies. The  
4 extracted information included: (i) publication details: author(s), year of publication, country of  
5 origin; (ii) intervention details: study type, participants, description of intervention and (iii) results:  
6 outcome measures. Charting of the first three studies was performed together by the two reviewers  
7 (KY and JQL) to establish a standardized method of extraction. Each reviewer then charted half  
8 of the remaining studies.  
9

### 14 **Collating, summarizing and reporting of results**

16  
17 The first step of data synthesis involved identifying the intervention elements present in each study.  
18 During full text screening of the 80 articles, a provisional list of common intervention elements  
19 implemented in the reported studies was identified by the reviewers (e.g., medication reviews,  
20 education and training, case conference, medication reconciliation, etc.) and the list was expanded  
21 and refined along the way. Coding of the intervention elements was performed independently by  
22 the two reviewers (KY and JQL), before meeting to compare, discuss and reach a consensus on  
23 the coding.  
24  
25  
26  
27  
28  
29

### 30 **Application of Behaviour Change Framework**

31  
32 The intervention elements were then mapped to the BCW intervention functions: *education,*  
33 *persuasion, incentivisation, coercion, training, restriction, environmental restructuring, modeling*  
34 *and enablement.* The definitions and examples of the BCW intervention functions are outlined in  
35 Supplementary File 3. Two reviewers (KY and JQL) performed the mapping independently before  
36 discussing and finalizing the synthesis.  
37  
38  
39  
40  
41

### 42 **Patient and Public Involvement**

43  
44 Patients and/or members of the public were not involved in this scoping review.  
45  
46  
47  
48

## 49 **RESULTS**

### 50 **Study selection and characteristics of included studies**

51  
52  
53  
54  
55  
56  
57  
58  
59  
60

The review selection process is summarized in Figure 1 using a Preferred Reporting Items for Systematic Reviews and Meta-Analyses (PRISMA) flow diagram. The initial search yielded 8204 abstracts after removal of duplicates. After title and abstract screening and full text review, 71 studies were included. Eleven systematic review papers relevant to our research question were identified and their reference lists were searched, adding another 9 studies. A total of 80 studies were included for data extraction and synthesis (references to the included studies are provided in Supplementary File 4). They comprised 40 interventional studies, 13 observational studies, 13 study protocols, 13 conference abstracts and 1 report. The characteristics of the included studies are summarized in Table 1. The studies originated from 19 countries, with the majority from the US (n = 25, 32%). More than 60% of the included studies were published in the last five years i.e. 2014 to present.

Table 1. Characteristics of included studies

| Characteristic                      | Frequency Count | Percentage |
|-------------------------------------|-----------------|------------|
| <b>Study Type</b>                   |                 |            |
| Interventional Studies              | 40              | 50.0%      |
| Randomized Controlled Trial         | 17              | 21.3%      |
| Pre-post study                      | 9               | 11.3%      |
| Cluster Randomized Controlled Trial | 7               | 8.8%       |
| Non-randomized trial                | 6               | 7.5%       |
| Randomized Trial                    | 1               | 1.3%       |
| Observational Studies               | 13              | 16.3%      |
| Prospective Cohort Study            | 10              | 12.5%      |
| Retrospective Cohort Study          | 2               | 2.5%       |
| Cross-sectional study               | 1               | 1.3%       |
| Others                              | 27              | 33.8%      |
| Study Protocol                      | 13              | 16.3%      |
| Conference Abstract                 | 13              | 16.3%      |
| Report                              | 1               | 1.3%       |
| <b>Publication Year</b>             |                 |            |
| 1998 - 2003                         | 8               | 10.0%      |
| 2004 - 2008                         | 8               | 10.0%      |
| 2009 - 2013                         | 15              | 18.8%      |
| 2014 - 2019                         | 49              | 61.3%      |
| <b>Country of Origin</b>            |                 |            |
| US & Canada                         | 31              | 38.8%      |
| UK & Ireland                        | 5               | 6.3%       |

|                |    |       |
|----------------|----|-------|
| Scandinavia    | 9  | 11.3% |
| Western Europe | 25 | 31.3% |
| Asia           | 6  | 7.5%  |
| Australia      | 3  | 3.8%  |
| Others         | 1  | 1.3%  |

### Intervention elements identified

14 intervention elements were identified from the included studies. Within each intervention element, variations were noted and coded separately to capture the differences in which the elements were performed (e.g., medication review performed by pharmacist or physician or both physician and pharmacist). The definitions of the 14 intervention elements are outlined in Tables 2, 3 and 4. *Medication review* was found to be the most frequently adopted intervention element (n=56; 70%), followed by *Training* (n=21; 26.3%), *Tool/instrument(s)* (n=18; 22.5%), *Feedback & audit* (n=15; 18.8%) and *Medication therapy management* (n=14; 17.5%). Of all medication reviews, 70% involved pharmacists (n=39; MR1, 2, 3 and 4), 27% were performed by physicians alone (n=15; MR5) and 2.5% were performed by physicians and medical assistants (n=2; MR6). *Case conference* and *Peer support* were the least frequently adopted intervention elements (n=3 and n=2 respectively). Interventions have an average of 2.5 elements, with more than 80% (n=65) consisting of more than one element. The highest number of elements present in a single intervention is eight[33].

### Mapping of intervention elements to BCW intervention functions

The 14 intervention elements were mapped to five of the nine BCW intervention functions, namely *education, persuasion, training, environmental restructuring* and *enablement*. Tables 2, 3 and 4 summarize the 14 intervention elements and their corresponding intervention functions. No intervention elements were mapped to the remaining 4 intervention functions (*Incentivisation, Coercion, Restriction, Modelling*)[28]. *Environmental restructuring* and *enablement* were the two functions that were most commonly identified among the intervention elements (n = 11 and n = 16 out of 24).

Medication review

1  
2  
3 Pharmacist-led medication reviews (MR1), medication reviews conducted by an external team of  
4 pharmacist(s) and/or physician(s) (MR3) and medication reviews conducted by pharmacist(s)  
5 without communicating recommendations to the physician directly (MR4) were mapped to the  
6 same three functions. The first function *persuasion* was performed as the pharmacist  
7 communicated their recommendations to the physician, prompting them to reconsider their  
8 prescription for the respective patients. *Environmental restructuring* was also served, when  
9 presence of a pharmacist changed the social context of the physician[28]. The third function was  
10 *enablement*, as the physicians' means to prescribe appropriately could increase with the  
11 pharmacist's review of the medications for drug-related problems. The function *persuasion* was  
12 not identified in medication reviews that were performed together by a pharmacist and a physician  
13 (MR2), as the pharmacist and physician worked together to reach a decision to resolve medication-  
14 related problems for the patient. Medication review that was performed solely by a physician  
15 (MR5) served the function of *enablement*, as the medication review provided an opportunity for  
16 the physician to review and rethink the prescription, after having an overview of the patient's  
17 medications and health records. Medication review that was performed by a physician and a  
18 medical assistant (MR6) served two functions. Firstly, involving medical assistant in the  
19 medication review process (e.g., brown bag review or medication reconciliation) changed the  
20 social context of the physician, which indicates *environment restructuring*[28]. Secondly, by  
21 providing a complete medication review or reconciliation list of medication to the physicians,  
22 medical assistants *enabled* them to review and make changes to patient's medication when  
23 necessary.  
24  
25  
26  
27  
28  
29  
30  
31  
32  
33  
34  
35  
36  
37  
38  
39

#### 40 Training

41 All three types of training (targeted at pharmacists (TG1), physicians (TG2) and medical assistants  
42 (TG3)) were mapped to the function *training*, as they served to equip healthcare professionals with  
43 practical skills to support the reduction of PIP.  
44  
45  
46  
47

#### 48 Tool/Instrument(s)

49 Tool and instrument(s) were mapped to the function of *enablement*, as they served as guidelines  
50 to increase the means and capability of prescribers to prescribe more appropriately. Among the 18  
51 studies that involved tool/instrument(s), the most commonly employed tools/instruments were the  
52  
53  
54  
55  
56  
57  
58  
59  
60

STOPP criteria (n = 7; 38.9%), followed by Screening Tool to Alert to Right Treatment (START) (n = 5; 27.8%) and Beers criteria (n = 4; 22.2%).

### Feedback & audit

Both types of feedback & audit (feedback only (FA1) and feedback with discussion of improvement strategies (FA2)) served the function of *persuasion*, since they prompted physicians to prescribe more appropriately through monitoring and feedback of their prescribing behavior. FA2 also served the function of *environmental restructuring*, as having someone to discuss strategies to improve prescribing changed the social context of the physician[28].

Table 2. Descriptions and Examples of Medication Review, Training, Tool/Instrument(s) and Feedback and audit

| Intervention Element | Definition                                                                                                                | Subtypes                                                           | Code | Examples                                                                                                                                                                                                                                                                               | BCW Intervention Functions                                                                                                  |
|----------------------|---------------------------------------------------------------------------------------------------------------------------|--------------------------------------------------------------------|------|----------------------------------------------------------------------------------------------------------------------------------------------------------------------------------------------------------------------------------------------------------------------------------------|-----------------------------------------------------------------------------------------------------------------------------|
| Medication Review    | 'Structured evaluation of patient's medicines with the aim of optimizing medicines use and improving health outcomes'[34] | Pharmacist-led with feedback to physician                          | MR1  | Clinical pharmacists performed drug therapy reviews for patients identified with high risk of polypharmacy and suggested drug therapy changes to the physicians by telephone, fax or in person. Physicians reviewed and endorsed recommendations[35].                                  | <ul style="list-style-type: none"> <li>• Persuasion</li> <li>• Environmental restructuring</li> <li>• Enablement</li> </ul> |
|                      |                                                                                                                           | Performed by pharmacist and physician                              | MR2  | Clinical pharmacist reviewed patient charts to determine patients at greatest risk for MRPs and worked side by side with physicians to consult patient and resolve MRPs[36].                                                                                                           | <ul style="list-style-type: none"> <li>• Environmental restructuring</li> <li>• Enablement</li> </ul>                       |
|                      |                                                                                                                           | Performed by an external team of pharmacist(s) and/or physician(s) | MR3  | A panel of 5 experts (physicians and pharmacists) not affiliated with the MCO or the academic medical center performed a peer review of the drugs to be included in the intervention and their corresponding alternative medications[37].                                              | <ul style="list-style-type: none"> <li>• Persuasion</li> <li>• Environmental restructuring</li> <li>• Enablement</li> </ul> |
|                      |                                                                                                                           | Performed by pharmacist (but not the one conveying feedback)       | MR4  | A clinical pharmacologist performed a thorough medication review of the selected patients, which was sent to the medication consultant. The medication consultant offered a visit at the general practitioner to discuss potential changes to the individual patient's medication[38]. | <ul style="list-style-type: none"> <li>• Persuasion</li> <li>• Environmental restructuring</li> <li>• Enablement</li> </ul> |
|                      |                                                                                                                           | Performed by physician                                             | MR5  | A letter was sent to selected patients to encourage them to make an appointment with their primary care physician for a medication review. Physicians were provided with patient-specific medication management report and clinical practice guidelines for managing polypharmacy[39]. | <ul style="list-style-type: none"> <li>• Enablement</li> </ul>                                                              |
|                      |                                                                                                                           | Performed by physician and medical assistant                       | MR6  | MA performed brown bag review and GPs reviewed the medication systematically using tools (PRISCUS list or MAI) to reduce potentially inappropriate medications[40].                                                                                                                    | <ul style="list-style-type: none"> <li>• Environmental restructuring</li> <li>• Enablement</li> </ul>                       |
| Training             | Imparting skills required to carry out intervention to improve prescribing[28]                                            | For pharmacists                                                    | TG1  | Pharmacists attended tutorial by the study pharmacist to ensure standardized method of medication review[41].                                                                                                                                                                          | <ul style="list-style-type: none"> <li>• Training</li> </ul>                                                                |
|                      |                                                                                                                           | For physicians                                                     | TG2  | 20 GPs were trained to use STOPP criteria[42].                                                                                                                                                                                                                                         | <ul style="list-style-type: none"> <li>• Training</li> </ul>                                                                |
|                      |                                                                                                                           | For medical assistants                                             | TG3  | MAAs were trained to perform brown bag reviews[40].                                                                                                                                                                                                                                    | <ul style="list-style-type: none"> <li>• Training</li> </ul>                                                                |



|                                                                                                                                        |                            |                                                                                                                          |                                                             |     |                                                                                                                                                                                                                                                                                           |                                                  |
|----------------------------------------------------------------------------------------------------------------------------------------|----------------------------|--------------------------------------------------------------------------------------------------------------------------|-------------------------------------------------------------|-----|-------------------------------------------------------------------------------------------------------------------------------------------------------------------------------------------------------------------------------------------------------------------------------------------|--------------------------------------------------|
| 1<br>2<br>3<br>4<br>5<br>6<br>7                                                                                                        | Tool/<br>instrument<br>(s) | Checklist/guideline(s)<br>used to identify<br>medication-related<br>problems or measure<br>medication<br>appropriateness | -                                                           | T11 | Pharmacist identified potential MRPs using<br>START/STOPP criteria to be addressed<br>with the provider[43].                                                                                                                                                                              | • Enablement                                     |
| 8<br>9<br>10<br>11<br>12<br>13<br>14<br>15<br>16                                                                                       | Feedback &<br>audit        | Monitoring and<br>evaluation of<br>physician's<br>prescribing patterns                                                   | Feedback only                                               | FA1 | Retrospective DUR identified patients at<br>risk of drug injury. Main prescribing GP of<br>identified patient received a personalized<br>feedback letter containing patient-specific<br>information and clinical practice<br>guidelines[44].                                              | • Persuasion                                     |
| 17<br>18<br>19<br>20<br>21<br>22<br>23<br>24<br>25<br>26<br>27<br>28<br>29<br>30<br>31<br>32<br>33<br>34<br>35<br>36<br>37<br>38<br>39 |                            |                                                                                                                          | Feedback with<br>discussion of<br>improvement<br>strategies | FA2 | A quality improvement tool was used to<br>track PIP and individualized feedback were<br>mailed to PCPs monthly. A geriatrician and<br>geriatric clinical pharmacist met face to<br>face with each PCP to review his/her first<br>feedback form and discuss improvement<br>strategies[45]. | • Persuasion<br>• Environmental<br>restructuring |

Abbreviations: BCW = behaviour change wheel; DUR = drug utilization review; GP = general practitioner; MA = medical assistant; MAI = medication appropriateness index; MCO = managed care organization; MRP = medication-related problem; PCP = primary care provider; PIP = potentially inappropriate prescribing; START = screening tool to alert to right treatment; STOPP = screening tool of older person's potentially inappropriate prescriptions

## Medication therapy management and Education

Both medication therapy management and education were mapped to the function of *education*, since they served to increase patients' knowledge and understanding about their medication regimen and educate healthcare professionals about PIP respectively.

Shared decision-making, Patient interview, Medication reconciliation and Comprehensive geriatric assessment

The intervention elements shared decision-making, patient interview, medication reconciliation and comprehensive geriatric assessment performed the function of *enablement*, as they increased the means or capability of physicians to prescribe more appropriately by providing in-depth and holistic information about the patient.

Table 3. Descriptions and Examples of Medication therapy management, Shared decision-making, Clinical decision support, Education and Patient Interview

| Intervention Element          | Definition                                                                                                                         | Subtypes | Code | Examples                                                                                                                                                                                                                                                                                                                                                                            | BCW Intervention Functions |
|-------------------------------|------------------------------------------------------------------------------------------------------------------------------------|----------|------|-------------------------------------------------------------------------------------------------------------------------------------------------------------------------------------------------------------------------------------------------------------------------------------------------------------------------------------------------------------------------------------|----------------------------|
| Medication therapy management | 'Providing verbal education and training designed to enhance patient understanding and appropriate use of his/her medications'[46] | -        | MTM1 | Patients will be provided with comprehensive counseling and specific adherence strategies (information about medications and administration) by the pharmacist[47].                                                                                                                                                                                                                 | • Education                |
| Shared decision-making        | Narrative based doctor-patient dialogue reflecting treatment targets and priorities of the patient[48]                             | -        | SDM1 | GPs met with patients 3 times within 12 months. First session was aimed at identifying patient's priorities in life (could be non-medical) and carving out treatment targets based on this information. Second session was a "brown bag review". On the third session, GPs discussed with patients goal attainment, changes in medication and treatment targets for the future[48]. | • Enablement               |

|                           |                                                                                                                                                                                                                                            |                                                           |      |                                                                                                                                                                                                                                                                                                                                                                                     |                                                                                                       |
|---------------------------|--------------------------------------------------------------------------------------------------------------------------------------------------------------------------------------------------------------------------------------------|-----------------------------------------------------------|------|-------------------------------------------------------------------------------------------------------------------------------------------------------------------------------------------------------------------------------------------------------------------------------------------------------------------------------------------------------------------------------------|-------------------------------------------------------------------------------------------------------|
| Clinical decision support | ‘Technological applications that provide clinicians, staff, patients or other individuals with knowledge and person-specific information, intelligently filtered or presented at appropriate times, to enhance health and health care’[49] | -                                                         | CDS1 | GP recorded medication and diagnoses in STRIPA and performed structured drug review using the software. STRIPA is a Dutch software-based tool that 1) highlights predictable adverse medication effects, 2) advises safe and appropriate therapy using STOPP/START criteria, 3) monitors for interactions and 4) provides appropriate dosing in accordance with renal function[50]. | <ul style="list-style-type: none"> <li>• Environmental restructuring</li> <li>• Enablement</li> </ul> |
| Education                 | Increasing knowledge or understanding about PIP[28]                                                                                                                                                                                        | For physicians                                            | ED1  | Physicians in the intervention group received: (1) a detailed educational brochure listing potentially inappropriate medications, (2) a list of suggested alternative medications (independently suggested and reviewed by 5 geriatricians and pharmacists not affiliated with the MCOs)[37].                                                                                       | <ul style="list-style-type: none"> <li>• Education</li> </ul>                                         |
|                           |                                                                                                                                                                                                                                            | For physicians and nurses                                 | ED2  | PCPs and nurses underwent tutorial on PIP[51].                                                                                                                                                                                                                                                                                                                                      | <ul style="list-style-type: none"> <li>• Education</li> </ul>                                         |
| Patient Interview         | ‘Asking patient about how, when and why the patient takes each medication, as well as about any adverse reactions, allergies or issues with medication cost the patient may have experienced’[52]                                          | Performed by physician                                    | PI1  | During the consultation, patients were interviewed on drugs currently being taken, dosage and frequency and the condition for which the medication had been prescribed[53].                                                                                                                                                                                                         | <ul style="list-style-type: none"> <li>• Enablement</li> </ul>                                        |
|                           |                                                                                                                                                                                                                                            | Performed by healthcare professional other than physician | PI2  | Patients received a 30-60 min face to face consultation with the pharmacist at the clinic. Prior to the consultation, pharmacist reviewed patient’s medical records. During the consultation, pharmacists interviewed patients for medication history, adherence and knowledge[54].                                                                                                 | <ul style="list-style-type: none"> <li>• Environmental restructuring</li> <li>• Enablement</li> </ul> |

Abbreviations: BCW = Behaviour Change Wheel; GP = general practitioner; MCO = managed care organization; PCP = primary care provider; PIP = potentially inappropriate prescribing; START = screening tool to alert to right treatment; STOPP = screening tool of older person’s potentially inappropriate prescriptions; STRIPA = systematic tool to reduce inappropriate prescribing-assistant

### Clinical decision support

As an intervention element, clinical decision support served the function of *environmental restructuring* by providing infrastructural support (changing physical context) and the function of *enablement* by increasing physicians’ means to prescribe appropriately.

### Multidisciplinary team, Case conference and Peer support

The intervention elements multidisciplinary team, case conference and peer support all performed the functions of *environmental restructuring* and *enablement*. *Environmental restructuring* was identified as the involvement of other physicians and healthcare professionals changed the social context of the physician, whereas *enablement* was served as support from co-workers increased the physician’s means to prescribe more appropriately.

Table 4. Descriptions and Examples of Medication Reconciliation, Multidisciplinary team, Comprehensive Geriatric Assessment, Case conference and Peer support

| Intervention Element               | Definition                                                                                                                                               | Code | Examples                                                                                                                                                                                                                                                   | BCW Intervention Functions                                                                            |
|------------------------------------|----------------------------------------------------------------------------------------------------------------------------------------------------------|------|------------------------------------------------------------------------------------------------------------------------------------------------------------------------------------------------------------------------------------------------------------|-------------------------------------------------------------------------------------------------------|
| Medication reconciliation          | 'The process of creating the most accurate list possible of all medications a patient is taking — including drug name, dosage, frequency, and route'[55] | MRC1 | HCA reconciled all patient's medications, which patient was instructed to bring in its original packaging[56].                                                                                                                                             | <ul style="list-style-type: none"> <li>• Enablement</li> </ul>                                        |
| Multidisciplinary team             | Involvement of healthcare professionals from more than two disciplines to address PIP in a patient                                                       | MT1  | Patient attended a shared medical appointment co-facilitated by a pharmacist, health psychologist, nurse practitioner, and physician, and consisted of interactive discussions about polypharmacy, adherence, and patients' beliefs about medications[57]. | <ul style="list-style-type: none"> <li>• Environmental restructuring</li> <li>• Enablement</li> </ul> |
| Comprehensive Geriatric Assessment | 'A multidimensional, multidisciplinary process which identifies medical, social and functional needs'[58]                                                | CGA1 | Complete geriatric assessment was carried out by geriatrician at geriatric day clinic[59].                                                                                                                                                                 | <ul style="list-style-type: none"> <li>• Enablement</li> </ul>                                        |
| Case conference                    | Meeting of a multidisciplinary team of healthcare professionals to discuss an individual patient's case or multiple patients' cases[60]                  | CC1  | Two physicians, a pharmacist and a nurse reviewed the list of drugs and the diagnoses of a subgroup of the experimental group in a case conference[60].                                                                                                    | <ul style="list-style-type: none"> <li>• Environmental restructuring</li> <li>• Enablement</li> </ul> |
| Peer support                       | Discussions between physicians for decision-making[61]                                                                                                   | PS1  | GPs engaged in group discussion about their prescribing behaviors facilitated by peer academic detailer[62].                                                                                                                                               | <ul style="list-style-type: none"> <li>• Environmental restructuring</li> <li>• Enablement</li> </ul> |

Abbreviations: BCW = Behaviour Change Wheel; GP = general practitioner; HCA = health care assistant

## DISCUSSION

Our results indicate that more than 80% of the interventions identified were complex with multi-modal approaches that comprise an average of 2.5 elements. This corroborates with past systematic reviews that also identified most interventions as being complex[63,64]. Furthermore, the intervention elements were targeted at various stakeholders. For instance, *Medication therapy management* aimed to educate patients, *training* served to equip healthcare providers with skills to improve prescribing, while *clinical decision support* provided infrastructural support. Taken together, these highlight the fact that PIP is a multi-faceted problem and multi-pronged approaches have been adopted to change the behaviours of stakeholders at the patient, healthcare provider and organization levels. *Medication review* is the most frequently adopted intervention element, much more so than *tool/instrument* and *clinical decision support*. It is likely due to the fact that PIP is a highly variable problem that varies according to the individual clinical context. The determination of medication appropriateness therefore requires not only theoretical knowledge, but also clinical judgment and experience. As such, the involvement of a pharmacist and physician in the

1  
2  
3 medication review process is crucial for sound decisions to be made to achieve optimal outcomes  
4 for patients.  
5  
6

7  
8 On the other hand, medication reviews are often time-consuming, making them a challenge to  
9 implement in busy clinical practice[65,66]. While physicians generally appreciated support from  
10 pharmacists, some studies have also noted that the collaboration between pharmacists and  
11 physicians required trust and rapport, which would take time to develop[67,68]. Therefore,  
12 although medication review was widely adopted as a strategy to reduce PIP, a systems-oriented  
13 approach to its implementation is needed for it to function as intended. *Case Conference* and *Peer*  
14 *support* were found to be the least frequently adopted intervention elements. It is likely that  
15 physicians were already seeking advice from their peers when they encounter more complex cases,  
16 albeit on an informal and ad-hoc basis. Notably, 13 studies that adopted the element *Shared*  
17 *decision-making* were all published in the last five years i.e. 2014 to January 2019. This could be  
18 attributed to the shift in recent years towards patient-centered care, where emphasis is placed on  
19 prioritizing individual patient's needs and expectations[69]. This is particularly relevant in the  
20 context of PIP, where stopping medications can be challenging for patients, and they tend to heed  
21 the advice of healthcare professionals only if they trust the latter[70]. In order to establish trust, it  
22 is essential for healthcare professionals to consider their concerns, thoughts and expectations.  
23  
24  
25  
26  
27  
28  
29  
30  
31  
32  
33

34 *Environmental restructuring* and *enablement* were the two BCW intervention functions most  
35 frequently mapped to the 14 intervention elements. *Environmental restructuring* constitutes a  
36 change in either the physical or social context[28]. This suggests that inadequate infrastructure and  
37 social support for prescribers were being addressed. *Enablement*, on the other hand, involves  
38 increasing prescribers' opportunities or capabilities to prescribe appropriately through addressing  
39 the barriers that limit their ability to prescribe optimally, such as incomplete information about  
40 patients.  
41  
42  
43  
44  
45  
46

47 Our findings will be useful in informing the development of a care intervention that will undergo  
48 feasibility testing in the second of three phases of the wider project. The anticipated product will  
49 be an effective, feasible and scalable physician-pharmacist collaborative care intervention to  
50 improve prescribing for older adults receiving outpatient care at public hospitals in Singapore.  
51  
52  
53  
54  
55  
56  
57  
58  
59  
60

## Strengths and Limitations

We aimed to achieve methodological rigour by adhering closely to the scoping review framework proposed by Arksey & O'Malley[30] and applying the recommendations outlined by Levac *et al.*[31] and JBI[32]. A comprehensive search in both peer-reviewed and grey literature was performed and the final search strategy was developed after several rounds of iteration. We documented all search iterations attempted and systematic decisions made along the way, in order to keep an accurate record of how the eventual search strategy was finalized. Following recommendations proposed by JBI, a step-by-step protocol was developed prior to undertaking the scoping review and our research question were clearly outlined in the format of 'Population, Concept, Context'. These steps helped to provide a clear direction and focus throughout the review process. The reviewers also met frequently to clarify doubts, as recommended by Levac *et al.*

Our initial search yielded a substantial number of titles and abstracts, which could suggest that our search strategy lacked specificity. However, given the lack of standardized terms and definitions (e.g., for the concept of 'polypharmacy') available on this subject, a broad array of search terms was used to capture as many studies relevant to our research question as possible. Due to feasibility reasons, language restrictions were imposed during literature search and study selection, which could result in the omission of relevant studies and underrepresentation of available literature. A limit was also placed on the year of publication of included studies, but this was to ensure that interventions identified were relevant to current healthcare contexts. Intervention elements and functions were only coded when explicitly stated or observed. Thus, coding was limited by the extent of intervention and methodological details reported. We also did not perform the sixth stage of the Arksey and O'Malley framework i.e. the consultation exercise. This stage will be replaced by a separate Delphi study, where findings from this scoping review will be presented to a panel of clinical experts to elicit their opinions on the relevance of our findings in local prescribing contexts.

As the intention for conducting our scoping review was to mainly focus on identifying all the intervention elements that have been implemented in the outpatient settings, interactions between intervention elements within an intervention package and the effectiveness or outcomes of these interventions were not examined. It would be interesting to explore the intervention elements that are most often grouped together and the effect these elements have on one another and on the

1  
2  
3 eventual outcome in a separate work. This could provide valuable evidence on the effectiveness  
4 of separate intervention elements when combined.  
5  
6

## 7 8 **CONCLUSION**

9  
10 This review represents the first scoping review performed to identify elements of care interventions  
11 that address PIP among older adults in the outpatient setting. The wide range of intervention  
12 elements found were characterized based on the functions they perform using the BCW  
13 intervention functions adapted from Michie *et al*[28]. The findings from this review would thus  
14 provide valuable information and guidance when designing a theory- and evidence-based complex  
15 intervention to reduce PIP. Furthermore, a theoretical framework is applied in the synthesis and  
16 analysis of data, which could be regarded as an adaptation of the scoping review methodology  
17 given that there is currently no formalized approach to data synthesis. Further investigation could  
18 involve exploring the interactions between different elements within an intervention and how they  
19 influence effectiveness in improving prescribing quality for older patients.  
20  
21  
22  
23  
24  
25  
26  
27

## 28 **FIGURE LEGEND**

29  
30 Figure 1. PRISMA flow diagram of study selection process.  
31  
32  
33

## 34 **REFERENCES**

- 35  
36  
37 1 Masnoon N, Shakib S, Kalisch-Ellett L, *et al*. What is polypharmacy? A systematic  
38 review of definitions. *BMC Geriatr*. 2017. doi:10.1186/s12877-017-0621-2  
39  
40 2 World Health Organization. Medication Safety in Polypharmacy. Technical Report.  
41 2019;:11–4.  
42  
43 3 Wastesson JW, Morin L, Tan ECK, *et al*. An update on the clinical consequences of  
44 polypharmacy in older adults: a narrative review. *Expert Opin. Drug Saf*. 2018.  
45 doi:10.1080/14740338.2018.1546841  
46  
47 4 Qato DM, Wilder J, Schumm LP, *et al*. Changes in Prescription and Over-the-Counter  
48 Medication and Dietary Supplement Use Among Older Adults in the United States, 2005  
49 vs 2011. *JAMA Intern Med* 2016;**176**:473. doi:10.1001/jamainternmed.2015.8581  
50  
51 5 Oktora MP, Denig P, Bos JHJ, *et al*. Trends in polypharmacy and dispensed drugs among  
52  
53  
54  
55  
56  
57  
58  
59  
60



- adults in the Netherlands as compared to the United States. *PLoS One* 2019;**14**:e0214240. doi:10.1371/journal.pone.0214240
- van den Akker M, Vaes B, Goderis G, *et al.* Trends in multimorbidity and polypharmacy in the Flemish-Belgian population between 2000 and 2015. *PLoS One* 2019;**14**:e0212046. doi:10.1371/journal.pone.0212046
- Zhang F, Mamtani R, Scott FI, *et al.* Increasing use of prescription drugs in the United Kingdom. *Pharmacoepidemiol Drug Saf* 2016;**25**:628–36. doi:10.1002/pds.3947
- Onoue H, Koyama T, Zamami Y, *et al.* Trends in Polypharmacy in Japan: A Nationwide Retrospective Study. *J Am Geriatr Soc* Published Online First: 2018. doi:10.1111/jgs.15569
- Baek YH, Shin JY. Trends in polypharmacy over 12 years and changes in its social gradients in South Korea. *PLoS One* Published Online First: 2018. doi:10.1371/journal.pone.0204018
- Nishtala PS, Salahudeen MS. Temporal trends in polypharmacy and hyperpolypharmacy in older new zealanders over a 9-year period: 2005-2013. *Gerontology* Published Online First: 2015. doi:10.1159/000368191
- Gallagher P, Barry P, O'Mahony D. Inappropriate prescribing in the elderly. *J Clin Pharm Ther* 2007;**32**:113–21. doi:10.1111/j.1365-2710.2007.00793.x
- Moßhammer D, Haumann H, Mörike K, *et al.* Polypharmacy-an Upward Trend with Unpredictable Effects. *Dtsch Arztebl Int* Published Online First: 2016. doi:10.3238/arztebl.2016.0627
- Dumbreck S, Flynn A, Nairn M, *et al.* Drug-disease and drug-drug interactions: Systematic examination of recommendations in 12 UK national clinical guidelines. *BMJ* Published Online First: 2015. doi:10.1136/bmj.h949
- Corsonello A, Pedone C, Incalzi R. Age-Related Pharmacokinetic and Pharmacodynamic Changes and Related Risk of Adverse Drug Reactions. *Curr Med Chem* Published Online First: 2010. doi:10.2174/092986710790416326
- Corsonello A, Abbatecola AM, Fusco S, *et al.* The impact of drug interactions and polypharmacy on antimicrobial therapy in the elderly. *Clin Microbiol Infect* Published Online First: 2015. doi:10.1016/j.cmi.2014.09.011
- Cho S, Lau SWJ, Tandon V, *et al.* Geriatric Drug Evaluation. *Arch Intern Med*



- 2011;**171**:937–40. doi:10.1001/archinternmed.2011.152
- 17 Maher RL, Hanlon J, Hajjar ER. Clinical consequences of polypharmacy in elderly. *Expert Opin Drug Saf* 2014;**13**:57–65. doi:10.1517/14740338.2013.827660
- 18 Bradley MC, Motterlini N, Padmanabhan S, *et al*. Potentially inappropriate prescribing among older people in the United Kingdom. *BMC Geriatr* 2014;**14**:72. doi:10.1186/1471-2318-14-72
- 19 Cahir C, Bennett K, Teljeur C, *et al*. Potentially inappropriate prescribing and adverse health outcomes in community dwelling older patients. *Br J Clin Pharmacol* 2014;**77**:201–10. doi:10.1111/bcp.12161
- 20 Peron EP, Gray SL, Hanlon JT. Medication Use and Functional Status Decline in Older Adults: A Narrative Review. *Am J Geriatr Pharmacother* Published Online First: 2011. doi:10.1016/j.amjopharm.2011.10.002
- 21 Wallace E, McDowell R, Bennett K, *et al*. Impact of Potentially Inappropriate Prescribing on Adverse Drug Events, Health Related Quality of Life and Emergency Hospital Attendance in Older People Attending General Practice: A Prospective Cohort Study. *Journals Gerontol Ser A Biol Sci Med Sci* 2017;**72**:271–7. doi:10.1093/gerona/glw140
- 22 Varga S, Alcusky M, Keith SW, *et al*. Hospitalization rates during potentially inappropriate medication use in a large population-based cohort of older adults. *Br J Clin Pharmacol* 2017;**83**:2572–80. doi:10.1111/bcp.13365
- 23 Clyne B, Fitzgerald C, Quinlan A, *et al*. Interventions to address potentially inappropriate prescribing in primary care: a systematic review of randomised control trials. *Int J Pharm Pract Conf 21st Heal Serv Res Pharm Pract Conf United kingdom* 2015;**23**:8-9. doi:10.1111/ijpp.12186
- 24 Scott IA, Pillans PI, Barras M, *et al*. Using EMR-enabled computerized decision support systems to reduce prescribing of potentially inappropriate medications: a narrative review. *Ther Adv Drug Saf* 2018;**9**:559–73. doi:http://dx.doi.org/10.1177/2042098618784809
- 25 Jokanovic N, Tan ECK, van den Bosch D, *et al*. Clinical medication review in Australia: A systematic review. *Res Soc Adm Pharm* 2016;**12**:384–418. doi:10.1016/j.sapharm.2015.06.007
- 26 Riordan DO, Walsh KA, Galvin R, *et al*. The effect of pharmacist-led interventions in optimising prescribing in older adults in primary care: a systematic review. *SAGE open*

1  
2  
3 *Med*

4 2016;**4**:2050312116652568.[https://www.ncbi.nlm.nih.gov/pmc/articles/PMC4910534/pdf/](https://www.ncbi.nlm.nih.gov/pmc/articles/PMC4910534/pdf/10.1177_2050312116652568.pdf)  
5  
6 10.1177\_2050312116652568.pdf  
7

- 8 27 Craig P. Developing and evaluating complex interventions.  
9 [www.mrc.ac.uk/complexinterventionsguidance](http://www.mrc.ac.uk/complexinterventionsguidance) (accessed 17 Jun 2019).  
10  
11 28 Michie S, van Stralen MM, West R. The behaviour change wheel: A new method for  
12 characterising and designing behaviour change interventions. *Implement Sci* Published  
13 Online First: 2011. doi:10.1186/1748-5908-6-42  
14  
15 29 Tombor I, Michie S, Tombor I, *et al*. Methods of Health Behavior Change. In: *Oxford*  
16 *Research Encyclopedia of Psychology*. 2017.  
17 doi:10.1093/acrefore/9780190236557.013.125  
18  
19 30 Arksey H, O'Malley L. Scoping studies: Towards a methodological framework. *Int J Soc*  
20 *Res Methodol Theory Pract* Published Online First: 2005.  
21 doi:10.1080/1364557032000119616  
22  
23 31 Levac D, Colquhoun H, O'Brien KK. Scoping studies: Advancing the methodology.  
24 *Implement Sci* Published Online First: 2010. doi:10.1186/1748-5908-5-69  
25  
26 32 Peters, M., D., J., Godfrey, C., M., McInerney, P., Soares, C., B., Khalil, H., Parker D.  
27 The Joanna Briggs Institute reviewers' manual 2015: Methodology for JBI scoping  
28 reviews. 2015. doi:10.1017/CBO9781107415324.004  
29  
30 33 Gardner AL, Thomas JM, Mecca MC, *et al*. Initiative to Minimize Pharmaceutical Risk in  
31 Older Veterans (IMPROVE) Polypharmacy Clinic. *Fed Pract* 2018.  
32  
33 34 Pharmaceutical Care Network. Medication review definition approved - Pharmaceutical  
34 Care Network Europe. 2016.[https://www.pcne.org/news/35/medication-review-definition-](https://www.pcne.org/news/35/medication-review-definition-approved)  
35 approved  
36  
37 35 Zarowitz BJ, Stebelsky LA, Muma BK, *et al*. Reduction of high-risk polypharmacy drug  
38 combinations in patients in a managed care setting. *Pharmacotherapy* 2005;**25**:1636–45.  
39 doi:10.1592/phco.2005.25.11.1636  
40  
41 36 Harris IM, Westberg SM, Frakes MJ, *et al*. Outcomes of medication therapy review in a  
42 family medicine clinic. *J Am Pharm Assoc* 2009;**49**:623–7.  
43 doi:10.1331/JAPhA.2009.08069  
44  
45 37 Fick DM, Maclean JR, Rodriguez NA, *et al*. A randomized study to decrease the use of  
46  
47  
48  
49  
50  
51  
52  
53  
54  
55  
56  
57  
58  
59  
60

- 1  
2  
3 potentially inappropriate medications among community-dwelling older adults in a  
4 southeastern managed care organization. *Am J Manag Care* 2004.  
5  
6  
7 38 Dalin, D. A., Vermehren, C., Jensen, A. K., Unkerskov, J., Reuther, L. Ø., & Andersen  
8 JPT. 107 Systematic medication review in general practice—a collaboration between  
9 clinical pharmacology and general practice. 2018;**23**:1–2.  
10  
11  
12 39 Fillit HM, Futterman R, Orland BI, *et al*. Polypharmacy management in medicare  
13 managed care: Changes in prescribing by primary care physicians resulting from a  
14 program promoting medication reviews. *Am J Manag Care* 1999;**5**:587–94.  
15  
16  
17 40 Jäger C, Freund T, Steinhäuser J, *et al*. Impact of a tailored program on the  
18 implementation of evidence-based recommendations for multimorbid patients with  
19 polypharmacy in primary care practices—results of a cluster-randomized controlled trial.  
20  
21  
22 *Implement Sci* 2017;**12**:8. doi:10.1186/s13012-016-0535-y  
23  
24  
25 41 Milos V, Rekman E, Bondesson A, *et al*. Improving the quality of pharmacotherapy in  
26 elderly primary care patients through medication reviews: a randomised controlled study.  
27  
28 *Drugs Aging* 2013;**30**:235–46. doi:10.1007/s40266-013-0057-0  
29  
30  
31 42 Prudence G, Maud C, Mélanie M, *et al*. Optimizing medication use in elderly people in  
32 primary care: Impact of STOPP criteria on inappropriate prescriptions. *Arch Gerontol*  
33 *Geriatr* 2018;**75**:16–9. doi:10.1016/j.archger.2017.10.022  
34  
35  
36 43 Kiel W, Phillips S. Impact of Pharmacist-Conducted Comprehensive Medication Reviews  
37 for Older Adult Patients to Reduce Medication Related Problems. *Pharmacy* 2017;**6**:2.  
38 doi:10.3390/pharmacy6010002  
39  
40  
41 44 Woodward MC, Streeton CL, Guttman A, *et al*. Polypharmacy management among  
42 Australian veterans: Improving prescribing through the Australian Department of  
43 Veterans' Affairs' prescriber feedback programme. *Intern Med J* 2008;**38**:95–100.  
44 doi:10.1111/j.1445-5994.2007.01453.x  
45  
46  
47 45 Vandenberg AE, Echt K V, Kemp L, *et al*. Academic Detailing with Provider Audit and  
48 Feedback Improve Prescribing Quality for Older Veterans. *J Am Geriatr Soc*  
49 2018;**66**:621–7. doi:10.1111/jgs.15247  
50  
51  
52 46 Bluml BM. Definition of Medication Therapy Management: Development of  
53 Professionwide Consensus. [www.japha.org](http://www.japha.org) (accessed 6 Jun 2019).  
54  
55  
56 47 Dauphinot V, Jean-Bart E, Krolak-Salmon P, *et al*. A multi-center, randomized, controlled  
57  
58  
59  
60

- 1  
2  
3 trial to assess the efficacy of optimization of drug prescribing in an elderly population, at  
4 18 months of follow-up, in the evolution of functional autonomy: the OPTIM study  
5 protocol. *BMC Geriatr* 2017;**17**:195. doi:10.1186/s12877-017-0600-7  
6  
7  
8 48 Schäfer I, Kaduszkiewicz H, Mellert C, *et al*. Narrative medicine-based intervention in  
9 primary care to reduce polypharmacy: results from the cluster-randomised controlled trial  
10 MultiCare AGENDA. *BMJ Open* 2018;**8**:e017653. doi:10.1136/bmjopen-2017-017653  
11  
12  
13 49 The Office of the National Coordinator for Health Information Technology (ONC).  
14 Clinical Decision Support | HealthIT.gov.  
15  
16 2018.<https://www.healthit.gov/topic/safety/clinical-decision-support>  
17  
18  
19 50 Streit S, Rozsnyai Z, Al B, *et al*. Optimising Pharmacotherapy In the multimorbid  
20 elderly in Primary Care a cluster randomized trial. 2012;:2011.  
21  
22 51 Schmidt-Mende K, Andersen M, Wettermark B, *et al*. Educational intervention on  
23 medication reviews aiming to reduce acute healthcare consumption in elderly patients  
24 with potentially inappropriate medicinesA pragmatic open-label cluster-randomized  
25 controlled trial in primary care. *PDS Pharmacoepidemiol Drug Saf* 2017;**26**:1347–56.  
26  
27  
28 52 Lauster CD, Srivastava SB. *Fundamental Skills for Patient Care in Pharmacy Practice*.  
29 2014. [www.jblearning.com](http://www.jblearning.com) (accessed 6 Jun 2019).  
30  
31  
32 53 McKinnon M, Townsend J, Cooper J, *et al*. Systematic review and clinical governance in  
33 repeat prescribing in general practice. *Prim Heal Care Res Dev* 2001;**2**:235–40.  
34  
35  
36 doi:10.1191/146342301682157719  
37  
38 54 Tan ECK, Stewart K, Elliott RA, *et al*. Pharmacist consultations in general practice  
39 clinics: the Pharmacists in Practice Study (PIPS). *Res Social Adm Pharm* 2014;**10**:623–32.  
40  
41  
42 doi:10.1016/j.sapharm.2013.08.005  
43  
44 55 Institute for Healthcare Improvement. Institute for Healthcare Improvement: Medication  
45 Reconciliation to Prevent Adverse Drug Events.  
46  
47 <http://www.ihl.org/Topics/ADEsMedicationReconciliation/Pages/default.aspx> (accessed 6  
48 Jun 2019).  
49  
50 56 Muth C, Uhlmann L, Haefeli WE, *et al*. Effectiveness of a complex intervention on  
51 Prioritising Multimедication in Multimorbidity (PRIMUM) in primary care: results of a  
52 pragmatic cluster randomised controlled trial. *BMJ Open* 2018;**8**:e017740.  
53  
54  
55 doi:10.1136/bmjopen-2017-017740  
56  
57  
58  
59  
60

- 1  
2  
3 57 Thomas, J., Zapatka, S., Brienza, R., Islam, L., Langerman, S., Mecca, M., ... & Hyson A.  
4 Mastering the art of deprescribing: An interprofessional outpatient polypharmacy program  
5 for older veterans using the shared medical appointment model. *J Am Geriatr Soc*  
6 2014;:1–331.  
7  
8  
9  
10 58 Parker SG, McCue P, Phelps K, *et al.* What is Comprehensive Geriatric Assessment  
11 (CGA)? An umbrella review. *Age Ageing* 2018;47:149–55. doi:10.1093/ageing/afx166  
12  
13 59 Frankfort S V, Tulner LR, van Campen JPCM, *et al.* Evaluation of Pharmacotherapy in  
14 Geriatric Patients after Performing Complete Geriatric Assessment at a??Diagnostic Day  
15 Clinic. *Clin Drug Investig* 2006;26:169–74. doi:10.2165/00044011-200626030-00007  
16  
17 60 Allard J, Hébert R, Rioux M, *et al.* Efficacy of a clinical medication review on the number  
18 of potentially inappropriate prescriptions prescribed for community-dwelling elderly  
19 people. *C Can Med Assoc J*  
20 2001;164:1291-1296.https://www.cochranelibrary.com/central/doi/10.1002/central/CN-  
21 00326776/full  
22  
23  
24  
25  
26  
27 61 Sinnott C, Mercer SW, Payne RA, *et al.* Improving medication management in  
28 multimorbidity: development of the Multimorbidity Collaborative Medication Review  
29 And DEcision Making (MY COMRADE) intervention using the Behaviour Change  
30 Wheel. *Implement Sci* 2015;10:132. doi:10.1186/s13012-015-0322-1  
31  
32  
33  
34 62 Rognstad S, Brekke M, Gjelstad S, *et al.* Potentially Inappropriate Prescribing to Older  
35 Patients: Criteria, Prevalence and an Intervention to Reduce It: The Prescription Peer  
36 Academic Detailing ( Rx- PAD) Study - A Cluster-Randomized, Educational Intervention  
37 in Norwegian General Practice. *Basic Clin Pharmacol Toxicol* 2018;123:380–91.  
38 doi:10.1111/bcpt.13040  
39  
40  
41  
42  
43 63 Johansson T, Abuzahra ME, Keller S, *et al.* Impact of strategies to reduce polypharmacy  
44 on clinically relevant endpoints: a systematic review and meta-analysis. *BCP Br J Clin*  
45 *Pharmacol* 2016;82:532–48.  
46  
47  
48 64 Rankin A, Cadogan CA, Patterson SM, *et al.* Interventions to improve the appropriate use  
49 of polypharmacy for older people. *Cochrane Database Syst. Rev.* 2018.  
50 doi:10.1002/14651858.CD008165.pub4  
51  
52  
53 65 Brandt M, Hallas J, Graabaek T, *et al.* Description of a practice model for pharmacist  
54 medication review in a general practice setting. *Pharm Pract (Granada)* 2014;12:420.  
55  
56  
57  
58  
59  
60

- 1  
2  
3 66 Campins L, Serra-Prat M, Gozalo I, *et al.* Randomized controlled trial of an intervention  
4 to improve drug appropriateness in community-dwelling polymedicated elderly people.  
5 *Fam Pract* 2017;**34**:36–42. doi:10.1093/fampra/cmz073  
6  
7  
8 67 Benson H, Lucas C, Kmet W, *et al.* Pharmacists in general practice: a focus on drug-  
9 related problems. *Int J Clin Pharm* 2018;**40**:566–72. doi:10.1007/s11096-018-0617-9  
10  
11 68 Blakey SA, Hixson-Wallace JA. Clinical and Economic Effects of Pharmacy Services in a  
12 Geriatric Ambulatory Clinic. *Pharmacotherapy* 2000;**20**:1198–203.  
13 doi:10.1592/phco.20.15.1198.34581  
14  
15 69 Reynolds A. Patient-centered Care. *Radiol Technol*;**81**:133–  
16 47. <http://www.ncbi.nlm.nih.gov/pubmed/19901351> (accessed 21 Jun 2019).  
17  
18 70 Hazen ACM, Zwart DLM, Poldervaart JM, *et al.* Non-dispensing pharmacists' actions and  
19 solutions of drug therapy problems among elderly polypharmacy patients in primary care.  
20 *Fam Pract* Published Online First: January 2019. doi:10.1093/fampra/cmz114  
21  
22  
23  
24  
25  
26

## 27 FOOTNOTE

28  
29  
30 **Contributors:** KY and JQL conducted the scoping review, participated in data extraction and  
31 synthesis, and wrote the first draft of the paper for submission. JQL is the corresponding author  
32 and has taken the primary responsibility for communication with the journal during the manuscript  
33 submission, peer review and publication process, and has ensured that all the journal's  
34 administrative requirements, such as providing details of authorship, and gathering conflict of  
35 interest forms and statements, are properly completed. YYD, KTT, WA and PL provided specific  
36 content clinical expertise to inform the discussion and implications of the study results (from the  
37 perspective of geriatrician, pharmacist and researcher). YLM was the study librarian on the study  
38 and contributed to the search strategy as well as draft and review of the methods of the manuscript.  
39 All seven authors reviewed the accuracy and integrity of the work.  
40  
41  
42  
43  
44  
45  
46  
47

48 **Funding:** Intramural Grant Award (GERI1622) from Geriatric Education and Research Institute,  
49 Singapore  
50

51 **Competing interests:** None declared.  
52

53 **Provenance and peer review:** Not commissioned; externally peer reviewed.  
54  
55  
56  
57  
58  
59  
60

1  
2  
3 **Patient and public involvement:** Patients and/or the public were not involved in the design,  
4 conduct, reporting, or dissemination plans of this research.  
5

6  
7 **Data sharing statement:** Readers interested in using our database for specific purposes related to  
8 their respective research are invited to do so by contacting the first author through their  
9 corresponding email address.  
10  
11  
12  
13  
14  
15  
16  
17  
18  
19  
20  
21  
22  
23  
24  
25  
26  
27  
28  
29  
30  
31  
32  
33  
34  
35  
36  
37  
38  
39  
40  
41  
42  
43  
44  
45  
46  
47  
48  
49  
50  
51  
52  
53  
54  
55  
56  
57  
58  
59  
60

For peer review only



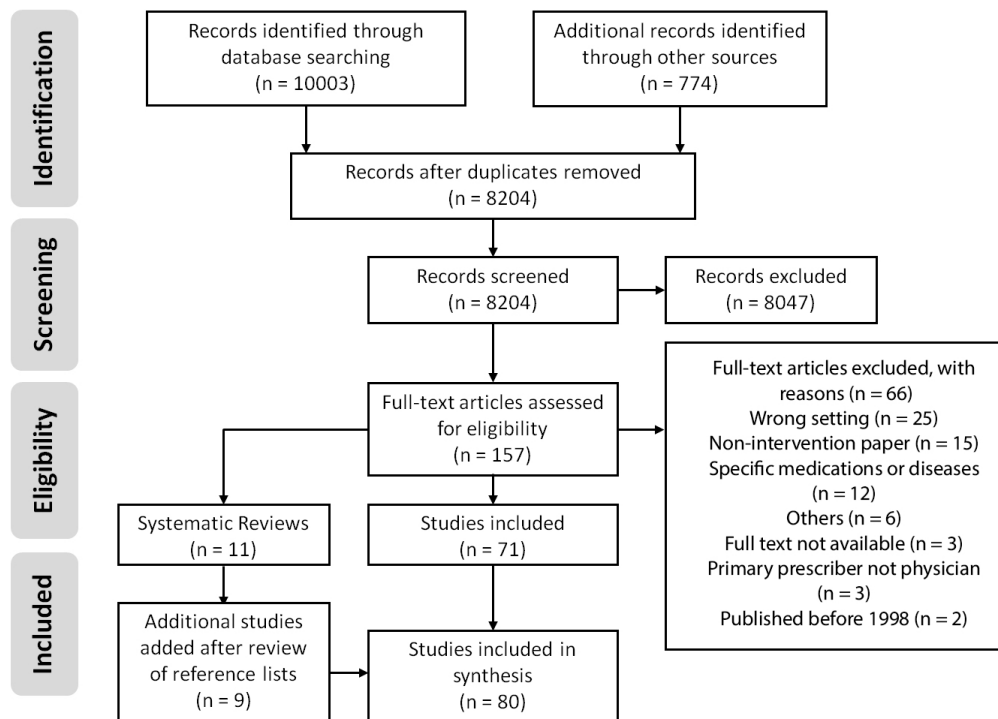

Figure 1. PRISMA flow diagram of study selection process.

225x164mm (150 x 150 DPI)

1  
2  
3  
4  
5  
6  
7  
8  
9  
10  
11  
12  
13  
14  
15  
16  
17  
18  
19  
20  
21  
22  
23  
24  
25  
26  
27  
28  
29  
30  
31  
32  
33  
34  
35  
36  
37  
38  
39  
40  
41  
42  
43  
44  
45  
46

| Research Question: What <u>intervention elements</u> ( <i>Concept (1)</i> ) have been adopted to <u>reduce inappropriate prescribing</u> ( <i>Concept (2)</i> ) among <u>older adults</u> ( <i>Population (1)</i> ) with <u>multimorbidity</u> ( <i>Population (2)</i> ) in <u>outpatient care</u> ( <i>Context</i> )? |                                                                                                                                                                                                                                              |                                         |                                                                                                                                                                                                             |                                                                                                                                                                                                                                                                                                                     |                                                                                                              |
|------------------------------------------------------------------------------------------------------------------------------------------------------------------------------------------------------------------------------------------------------------------------------------------------------------------------|----------------------------------------------------------------------------------------------------------------------------------------------------------------------------------------------------------------------------------------------|-----------------------------------------|-------------------------------------------------------------------------------------------------------------------------------------------------------------------------------------------------------------|---------------------------------------------------------------------------------------------------------------------------------------------------------------------------------------------------------------------------------------------------------------------------------------------------------------------|--------------------------------------------------------------------------------------------------------------|
|                                                                                                                                                                                                                                                                                                                        | Population (1)<br><b>Older adults *</b>                                                                                                                                                                                                      | Population (2)<br><b>Multimorbidity</b> | Concept (1)<br><b>Interventions</b>                                                                                                                                                                         | Concept (2)<br><b>Reduce inappropriate prescribing</b>                                                                                                                                                                                                                                                              | Context<br><b>Outpatient care</b>                                                                            |
| MeSH Terms                                                                                                                                                                                                                                                                                                             | Aged                                                                                                                                                                                                                                         | Comorbidity<br>Multimorbidity           | Medication Reconciliation<br>Patient Care Management<br>Case management<br>Drug Utilization Review<br>Guideline Adherence<br>Decision Support Systems, Clinical                                             | Inappropriate Prescribing<br>Polypharmacy<br>Potentially Inappropriate Medication List<br>Deprescriptions<br>Drug Prescriptions<br>Practice Patterns, Physicians'                                                                                                                                                   | Ambulatory Care<br>Outpatient Clinics, Hospital<br>Community Health Centers<br>Primary Health Care           |
| Key Words                                                                                                                                                                                                                                                                                                              | Aged<br>Elderly<br>Senior<br>Seniors<br>Older person<br>Older persons<br>Older people<br>Older adult<br>Older adults<br>Older patient<br>Older patients<br>Older<br>population<br>Older subject<br>Older subjects<br>Geriatric<br>Geriatrics | Comorbidity<br>Multimorbidity           | Intervention<br>Interventions<br>Implementation<br>Strategy<br>Strategies<br>Behavior change technique<br>Medication review<br>Medication reviews<br>Medication management<br>Medication therapy management | Prescribing<br>Prescription<br>Prescriptions<br>Medication<br>Medications<br>Medicine<br>Medicines<br>Drug prescription<br>Drug prescriptions<br>Inappropriate prescribing<br>Deprescribing<br>Physician practice pattern<br>Physician practice patterns<br>Clinical practice pattern<br>Clinical practice patterns | Outpatient<br>Ambulatory Care<br>Clinic<br>Clinics<br>Primary Care<br>Primary Healthcare<br>General Practice |

\* Search terms under Population (1) were removed after several iterative searches to increase the breadth of our search. However, we specified under our eligibility criteria to include studies as long as they involved adults above the age of 65.

## PubMed Search Strategy

Search (((Comorbidity[MeSH Terms]) OR (Multimorbidity[MeSH Terms]) OR "Polypharmacy"[Mesh])) OR (((comorbidity[Title/Abstract] OR multimorbidity[Title/Abstract] OR polypharmacy[Title/Abstract])) OR (comorbidity[Text Word] OR multimorbidity[Text Word] OR polypharmacy[Text Word])) AND (((("Medication Reconciliation"[Mesh] OR "Patient Care Management"[Mesh] OR "Case Management"[Mesh] OR "Drug Utilization Review"[Mesh] OR "Guideline Adherence"[Mesh] OR "Decision Support Systems, Clinical"[Mesh])) OR (((intervention[Title/Abstract] OR interventions[Title/Abstract] OR implementation[Title/Abstract] OR strategy[Title/Abstract] OR strategies[Title/Abstract] OR medication review[Title/Abstract] OR medication reviews[Title/Abstract] OR medication management[Title/Abstract] OR medication therapy management[Title/Abstract] OR behavior change technique[Title/Abstract])) OR (intervention[Text Word] OR interventions[Text Word] OR implementation[Text Word] OR strategy[Text Word] OR strategies[Text Word] OR medication review[Text Word] OR medication reviews[Text Word] OR medication management[Text Word] OR medication therapy management[Text Word] OR behavior change technique[Text Word])))) AND (((("Inappropriate Prescribing"[Mesh] OR "Potentially Inappropriate Medication List"[Mesh] OR "Deprescriptions"[Mesh] OR "Drug Prescriptions"[Mesh] OR "Practice Patterns, Physicians"[Mesh])) OR (((prescribing[Title/Abstract] OR prescription[Title/Abstract] OR prescriptions[Title/Abstract] OR medication[Title/Abstract] OR medications[Title/Abstract] OR medicine[Title/Abstract] OR medicines[Title/Abstract] OR drug prescription[Title/Abstract] OR drug prescriptions[Title/Abstract] OR inappropriate prescribing[Title/Abstract] OR deprescribing[Title/Abstract] OR physician practice pattern[Title/Abstract] OR physician practice patterns[Title/Abstract] OR clinical practice pattern[Title/Abstract] OR clinical practice patterns[Title/Abstract])) OR (prescribing[Text Word] OR prescription[Text Word] OR prescriptions[Text Word] OR medication[Text Word] OR medications[Text Word] OR medicine[Text Word] OR medicines[Text Word] OR drug prescription[Text Word] OR drug prescriptions[Text Word] OR inappropriate prescribing[Text Word] OR deprescribing[Text Word] OR physician practice pattern[Text Word] OR physician practice patterns[Text Word] OR clinical practice pattern[Text Word] OR clinical practice patterns[Text Word])))) AND (((("Ambulatory Care"[Mesh] OR "Outpatient Clinics, Hospital"[Mesh] OR "Community Health Centers"[Mesh] OR "Primary Health Care"[Mesh])) OR (((Outpatient[Title/Abstract] OR Ambulatory Care[Title/Abstract] OR Clinic[Title/Abstract] OR Clinics[Title/Abstract] OR Primary Care[Title/Abstract] OR Primary Healthcare[Title/Abstract] OR General Practice[Title/Abstract])) OR (Outpatient[Text Word] OR Ambulatory Care[Text Word] OR Clinic[Title/Abstract] OR Clinics[Text Word] OR Primary Care[Text Word] OR Primary Healthcare[Text Word] OR General Practice[Text Word])))) AND (("1998/01/01"[PDat] : "2019/12/31"[PDat]) AND English[lang])

### BCW intervention function definitions and examples

| Intervention Function       | Definition                                                                                                                                                                  | Example of intervention function                                                                                                                |
|-----------------------------|-----------------------------------------------------------------------------------------------------------------------------------------------------------------------------|-------------------------------------------------------------------------------------------------------------------------------------------------|
| Education                   | Increasing knowledge or understanding                                                                                                                                       | Providing information to promote healthy eating                                                                                                 |
| Persuasion                  | Using communication to induce positive or negative feelings or stimulate action                                                                                             | Using imagery to motivate increases in physical activity                                                                                        |
| Incentivisation             | Creating an expectation of reward                                                                                                                                           | Using prize draws to induce attempts to stop smoking                                                                                            |
| Coercion                    | Creating an expectation of punishment or cost                                                                                                                               | Raising the financial cost to reduce excessive alcohol consumption                                                                              |
| Training                    | Imparting skills                                                                                                                                                            | Advanced driver training to increase safe driving                                                                                               |
| Restriction                 | Using rules to reduce the opportunity to engage in the target behaviour (or to increase the target behaviour by reducing the opportunity to engage in competing behaviours) | Prohibiting sales of solvents to people under 18 to reduce use for intoxication                                                                 |
| Environmental restructuring | Changing the physical or social context                                                                                                                                     | Providing on-screen prompts for GPs to ask about smoking behaviour                                                                              |
| Modelling                   | Providing an example for people to aspire to or imitate                                                                                                                     | Using TV drama scenes involving safe sex practices to increase condom use                                                                       |
| Enablement                  | Increasing means/reducing barriers to increase capability (beyond education and training) or opportunity (beyond environmental restructuring)                               | Behavioral support for smoking cessation, medication for cognitive deficits, surgery to reduce obesity, prostheses to promote physical activity |

Taken from: Michie S, Atkins L, West R. *The Behavior Change Wheel: A Guide to Designing Interventions*. London, UK: Silverback Publishing 2014.

## List of Included Studies

1. Allard J, Hébert R, Rioux M, Asselin J, Voyer L. Efficacy of a clinical medication review on the number of potentially inappropriate prescriptions prescribed for community-dwelling elderly people. *Canadian Medical Association Journal*. 2001;164(9):1291-6.
2. Benson H, Lucas C, Kmet W, Benrimoj SI, Williams K. Pharmacists in general practice: a focus on drug-related problems. *International Journal of Clinical Pharmacy*. 2018 1;40(3):566-72.
3. Blakey SA, Hixson-Wallace JA. Clinical and economic effects of pharmacy services in a geriatric ambulatory clinic. *Pharmacotherapy: The Journal of Human Pharmacology and Drug Therapy*. 2000;20(10):1198-203.
4. Brandt M, Hallas J, Graabæk T, Pottgård A. Description of a practice model for pharmacist medication review in a general practice setting. *Pharmacy Practice*. 2014;12(3).
5. Bregnhøj L, Thirstrup S, Kristensen MB, Bjerrum L, Sonne J. Combined intervention programme reduces inappropriate prescribing in elderly patients exposed to polypharmacy in primary care. *European journal of clinical pharmacology*. 2009 1;65(2):199-207.
6. Brett M, Graham KL. When less is more: teaching the art and science of deprescribing to address polypharmacy in primary care [abstract]. *Journal of general internal medicine* 2018 1; 33: S750.
7. Campins L, Serra-Prat M, Gózaló I, López D, Palomera E, Agustí C, Cabré M. Randomized controlled trial of an intervention to improve drug appropriateness in community-dwelling polymedicated elderly people. *Family practice*. 2017 1;34(1):36-42.
8. Cardwell K, Clyne B, Moriarty F, Wallace E, Fahey T, Boland F, McCullagh L, Clarke S, Finnigan K, Daly M, Barry M. Supporting prescribing in Irish primary care: protocol for a non-randomised pilot study of a general practice pharmacist (GPP) intervention to optimise prescribing in primary care. *Pilot and feasibility studies*. 2018;4(1):122.
9. Chan DC, Chen JH, Wen CJ, Chiu LS, Wu SC. Effectiveness of the medication safety review clinics for older adults prescribed multiple medications. *Journal of the Formosan Medical Association*. 2014 1;113(2):106-13.
10. Chiu Y, Lin G, Wu T. By implementing of medication reconciliation to improve the medication safety of patients with polypharmacy issues [abstract]. *ACCP Global Conference on Clinical Pharmacy*. 2018;P. 230.
11. Christensen DB, Roth M, Trygstad T, Byrd J. Evaluation of a pilot medication therapy management project within the North Carolina State Health Plan. *Journal of the American Pharmacists Association*. 2007 1;47(4):471-83.
12. Clyne B, Bradley MC, Hughes C, Fahey T, Lapane KL. Electronic prescribing and other forms of technology to reduce inappropriate medication use and polypharmacy in older people: a review of current evidence. *Clinics in geriatric medicine*. 2012 1;28(2):301-22.
13. Conway S, Smith E. Comprehensive medication management within primary care office of patient-centered medical home model [abstract]. *Pharmacotherapy*. 2017;137(12):E215.
14. Dalin DA, Vermehren C, Jensen AK, Unkerskov J, Reuther LØ, Andersen JP. 107 Systematic medication review in general practice—a collaboration between clinical pharmacology and general practice [abstract].
15. Dauphinot V, Jean-Bart E, Krolak-Salmon P, Mouchoux C. A multi-center, randomized, controlled trial to assess the efficacy of optimization of drug prescribing in an elderly population, at 18 months of follow-up, in the evolution of functional autonomy: the OPTIM study protocol. *BMC geriatrics*. 2017 1;17(1):195.
16. Esmaily HM, Silver I, Shiva S, Gargani A, Maleki-Dizaji N, Al-Maniri A, Wahlstrom R. Can rational prescribing be improved by an outcome-based educational approach? A randomized trial completed in Iran. *Journal of Continuing Education in the Health Professions*. 2010;30(1):11-8.

17. Fick DM, Maclean JR, Rodriguez NA, Short L, Heuvel RV, Waller JL, Rogers RL. A randomized study to decrease the use of potentially inappropriate medications among community-dwelling older adults in a southeastern managed care organization. *Am J Manag Care*. 2004 1;10(11):761-8.
18. Fillit HM, Futterman R, Orland BI, Chim T, Susnow L, Picariello GP, Scheye EC, Spoeri RK, Roglieri JL, Warburton SW. Polypharmacy management in Medicare managed care: changes in prescribing by primary care physicians resulting from a program promoting medication reviews. *Am J Manag Care*. 1999 1;5(5):587-94.
19. Frankfort SV, Tulner LR, van Campen JP, Koks CH, Beijnen JH. Evaluation of pharmacotherapy in geriatric patients after performing complete geriatric assessment at a diagnostic day clinic. *Clinical drug investigation*. 2006 1;26(3):169-74.
20. Gibert P, Cabaret M, Moulis M, Bosson JL, Boivin JE, Chanoine S, Allenet B, Bedouch P, Gavazzi G. Optimizing medication use in elderly people in primary care: Impact of STOPP criteria on inappropriate prescriptions. *Archives of gerontology and geriatrics*. 2018 1;75:16-9.
21. Gómez MA, Villafaina A, Hernández J, Salgado RM, González MÁ, Rodríguez J, Concha MM, Tarrío A, Gervasini G, Carrillo JA. Promoting appropriate drug use through the application of the Spanish drug-related problem classification system in the primary care setting. *Annals of Pharmacotherapy*. 2009;43(2):339-46.
22. Harris IM, Westberg SM, Frakes MJ, Van Vooren JS. Outcomes of medication therapy review in a family medicine clinic. *Journal of the American Pharmacists Association*. 2009 1;49(5):623-7.
23. Hasler S, Senn O, Rosemann T, Neuner-Jehle S. Effect of a patient-centered drug review on polypharmacy in primary care patients: study protocol for a cluster-randomized controlled trial. *Trials*. 2015 Dec;16(1):380.
24. Hazen AC, Zwart DL, Poldervaart JM, de Gier JJ, de Wit NJ, de Bont AA, Bouvy ML. Non-dispensing pharmacists' actions and solutions of drug therapy problems among elderly polypharmacy patients in primary care. *Family practice*. 2019;36(5):544-51.
25. Hoffman J, Gleiberman S, Stern D, Osterweil D. Impact of a Pharmacist in a Specialized Ambulatory Care Geriatric Setting [abstract]. *Journal of the American Geriatrics Society*. 2014;62:B136.
26. Hsu YM, Hsu LZ, Huang CH, Hsu SL, Chien SY. PHP57 Clinical Effects of Pharmacist Interventions for Polypharmacy in a Geriatric Clinic in Taiwan [abstract]. *Value in Health*. 2012 1;15(7):A619.
27. Jäger C, Freund T, Steinhäuser J, Stock C, Krisam J, Kaufmann-Kolle P, Wensing M, Szecsenyi J. Impact of a tailored program on the implementation of evidence-based recommendations for multimorbid patients with polypharmacy in primary care practices—results of a cluster-randomized controlled trial. *Implementation Science*. 2017;12(1):8.
28. Khera S, Abbasi M, Dabravolskaj J, Sadowski CA, Makhinova T, Lee H. Integrated primary care medication management process for older adults with frailty [abstract]. *Journal of the American Geriatrics Society*. 2018 1;66: S51-S52.
29. Kiel WJ, Phillips SW. Impact of pharmacist-conducted comprehensive medication reviews for older adult patients to reduce medication related problems. *Pharmacy*. 2018;6(1):2.
30. Rodondi N. Optimising thERapy to Prevent Avoidable Hospital admissions in the multimorbid older people. *ClinicalTrials.gov*. 2017.
31. Kwint HF, Mertens BJ, Bouvy ML. Impact of deprescribing as part of clinical medication review on polypharmacy of older patients in an integrated primary care setting [abstract]. *International Journal Of Clinical Pharmacy*. 2017 1;39(4): 969.
32. LaBella S, Li G, Barnes K, Matthews D, Beatty S. Measuring the impact of an interdisciplinary polypharmacy clinic within a patient-centered medical home [abstract]. *Journal of the American Pharmacists Association*. 2014:144



- 1
- 2
- 3
- 4 33. González ML, Martin MF, Girones MZ, Hernández MC. PS-080 Drug related problems
- 5 identified through medication review in elderly patients in primary healthcare [poster]. *EAHP*.
- 6 2016;PS-080.
- 7
- 8 34. Lampela P, Hartikainen S, Lavikainen P, Sulkava R, Huupponen R. Effects of medication
- 9 assessment as part of a comprehensive geriatric assessment on drug use over a 1-year period.
- 10 *Drugs & Aging*. 2010 1;27(6):507-21.
- 11
- 12 35. Lea SC, Watts KL, Davis NA, Panayiotou B, Bankart MJ, Arora A, Chambers R. The
- 13 potential clinical benefits of medicines optimisation through comprehensive geriatric
- 14 assessment, carried out by secondary care geriatricians, in a general practice care setting in
- 15 North Staffordshire, UK: a feasibility study. *BMJ Open*. 2017 1;7(9):e015278.
- 16
- 17 36. Leendertse AJ, de Koning GHP, Goudswaard AN, *et al*. Preventing hospital admissions by
- 18 reviewing medication (PHARM) in primary care: an open controlled study in an elderly
- 19 population. *J Clin Pharm Ther* 2013;38:379–87. doi:10.1111/jcpt.12069
- 20
- 21 37. Lenander C, Bondesson Å, Viberg N, Jakobsson U, Beckman A, Midlöv P. Effects of an
- 22 intervention (SÄKLÄK) on prescription of potentially inappropriate medication in elderly
- 23 patients. *Family practice*. 2017;34:213-8.
- 24
- 25 38. Lenander C, Elfsson B, Danielsson B, Midlöv P, Hasselström J. Effects of a pharmacist-led
- 26 structured medication review in primary care on drug-related problems and hospital
- 27 admission rates: a randomized controlled trial. *Scandinavian Journal of Primary Health Care*.
- 28 2014 1;32(4):180-6.
- 29
- 30 39. Lin HW, Lin CH, Chang CK, Chou CY, Yu IW, Lin CC, Li TC, Li CI, Hsieh YW. Economic
- 31 outcomes of pharmacist-physician medication therapy management for polypharmacy elderly:
- 32 A prospective, randomized, controlled trial. *Journal of the Formosan Medical Association*.
- 33 2018 1;117(3):235-43.
- 34
- 35 40. Linton A, Bacon TA, Trice S, Devine J, Cottrell L, McGinnis TJ, McAllister EB. Results
- 36 from a mailed promotion of medication reviews among Department of Defense beneficiaries
- 37 receiving 10 or more chronic medications. *Journal of Managed Care Pharmacy*.
- 38 2010;16(8):578-92.
- 39
- 40 41. Jungo KT, Rozsnyai Z, Mantelli S, Floriani C, Löwe AL, Lindemann F, Schwab N, Meier R,
- 41 Elloumi L, Huibers CJ, Sallevelt BT. 'Optimising Pharmacotherapy In the multimorbid
- 42 elderly in primary Care: the OPTICA trial. *ClinicalTrials*, gov. 2019.
- 43
- 44 42. Greiver M, Dahrouge S, O'Brien P, Manca D, Lussier MT, Wang J, Burge F, Grandy M,
- 45 Singer A, Twohig M, Moineddin R. Improving care for elderly patients living with
- 46 polypharmacy: protocol for a pragmatic cluster randomized trial in community-based primary
- 47 care practices in Canada. *Implementation Science*. 2019 1;14(1):55.
- 48
- 49 43. Zarowitz BJ, Stebelsky LA, Muma BK, Romain TM, Peterson EL. Reduction of high-risk
- 50 polypharmacy drug combinations in patients in a managed care setting. *Pharmacotherapy:*
- 51 *The Journal of Human Pharmacology and Drug Therapy*. 2005;25(11):1636-45.
- 52
- 53 44. Woodward MC, Streeton CL, Guttman A, Killer GT, Peck RW. Polypharmacy management
- 54 among Australian veterans: improving prescribing through the Australian Department of
- 55 Veterans' Affairs' prescriber feedback programme. *Internal Medicine Journal*.
- 56 2008;38(2):95-100.
- 57
- 58 45. Willeboordse F, Schellevis FG, Chau SH, Hugtenburg JG, Elders PJ. The effectiveness of
- 59 optimised clinical medication reviews for geriatric patients: Opti-Med a cluster randomised
- 60 controlled trial. *Family Practice*. 2017 1;34(4):437-45.
- 61
- 62 46. White C, Hughes-Stricklett A. The impact of a pharmacy resident geriatric clinic [abstract].
- 63 *Pharmacotherapy*. 2013 1;33(10): E254.
- 64
- 65 47. Wessell AM, Nietert PJ, Jenkins RG, Nemeth LS, Ornstein SM. Inappropriate medication use
- 66 in the elderly: results from a quality improvement project in 99 primary care practices. *The*
- 67 *American Journal of Geriatric Pharmacotherapy*. 2008 1;6(1):21-7.



- 1
  - 2
  - 3
  - 4
  - 5
  - 6
  - 7
  - 8
  - 9
  - 10
  - 11
  - 12
  - 13
  - 14
  - 15
  - 16
  - 17
  - 18
  - 19
  - 20
  - 21
  - 22
  - 23
  - 24
  - 25
  - 26
  - 27
  - 28
  - 29
  - 30
  - 31
  - 32
  - 33
  - 34
  - 35
  - 36
  - 37
  - 38
  - 39
  - 40
  - 41
  - 42
  - 43
  - 44
  - 45
  - 46
  - 47
  - 48
  - 49
  - 50
  - 51
  - 52
  - 53
  - 54
  - 55
  - 56
  - 57
  - 58
  - 59
  - 60
48. Weiss BD, Brega AG, LeBlanc WG, Mabachi NM, Barnard J, Albright K, Cifuentes M, Brach C, West DR. Improving the effectiveness of medication review: guidance from the health literacy universal precautions toolkit. *The Journal of the American Board of Family Medicine*. 2016 1;29(1):18-23.
49. Vanderman AJ, Moss JM, Bryan III WE, Sloane R, Jackson GL, Hastings SN. Evaluating the impact of medication safety alerts on prescribing of potentially inappropriate medications for older veterans in an ambulatory care setting. *Journal of Pharmacy Practice*. 2017;30(1):82-8.
50. Touchette DR, Masica AL, Dolor RJ, Schumock GT, Choi YK, Kim Y, Smith SR. Safety-focused medication therapy management: a randomized controlled trial. *Journal of the American Pharmacists Association*. 2012 1;52(5):603-12.
51. Thomas J, Zapatka S, Brienza R, Islam L, Langerman S, Mecca M, Niehoff K, Hyson A. Mastering the art of deprescribing: An interprofessional outpatient polypharmacy program for older veterans using the shared medical appointment model: D106 [abstract]. *Journal of the American Geriatrics Society*. 2014;62.
52. Taylor CT, Byrd DC, Krueger K. Improving primary care in rural Alabama with a pharmacy initiative. *American Journal of Health-System Pharmacy*. 2003 1;60(11):1123-9.
53. Tan EC, Stewart K, Elliott RA, George J. Pharmacist consultations in general practice clinics: the Pharmacists in Practice Study (PIPS). *Research in Social and Administrative Pharmacy*. 2014 1;10(4):623-32.
54. Tamblyn R, Huang A, Perreault R, Jacques A, Roy D, Hanley J, McLeod P, Laprise R. The medical office of the 21st century (MOXXI): effectiveness of computerized decision-making support in reducing inappropriate prescribing in primary care. *Canadian Medical Association Journal*. 2003 16;169(6):549-56.
55. Stefanovic SM, Jankovic SM. Knowledge of the pharmacological profile of a patient improves the quality of prescribing, the outcomes of treatment, and the utilization of health services in primary health care. *European Journal of Clinical Pharmacology*. 2011 1;67(11):1091.
56. Vandenberg AE, Echt KV, Kemp L, McGwin G, Perkins MM, Mirk AK. Academic detailing with provider audit and feedback improve prescribing quality for older veterans. *Journal of the American Geriatrics Society*. 2018;66(3):621-7.
57. Souag, A. Elderly Appropriate Treatment in Primary Care (EAT) (TAPAGE). *ClinicalTrials.gov*. 2017.
58. Sönnichsen A, Trampisch US, Rieckert A, Piccoliori G, Vögele A, Flamm M, Johansson T, Esmail A, Reeves D, Löffler C, Höck J. Polypharmacy in chronic diseases—reduction of inappropriate medication and adverse drug events in older populations by electronic decision support (PRIMA-eDS): study protocol for a randomized controlled trial. *Trials*. 2016 1;17(1):57.
59. Soendergaard B, Kirkeby B, Dinsen C, Herborg H, Kjellberg J, Staehr P. Drug-related problems in general practice: results from a development project in Denmark. *Pharmacy World and Science*. 2006 1;28(2):61-4.
60. Shim YW, Chua SS, Wong HC, Alwi S. Collaborative intervention between pharmacists and physicians on elderly patients: a randomized controlled trial. *Therapeutics and Clinical Risk Management*. 2018;14:1115.
61. Sellors J, Kaczorowski J, Sellors C, Dolovich L, Woodward C, Willan A, Goeree R, Cosby R, Trim K, Sebaldt R, Howard M. A randomized controlled trial of a pharmacist consultation program for family physicians and their elderly patients. *Canadian Medical Association Journal*. 2003 8;169(1):17-22.
62. Schmidt-Mende K, Andersen M, Wettermark B, Hasselström J. Educational intervention on medication reviews aiming to reduce acute healthcare consumption in elderly patients with potentially inappropriate medicines—A pragmatic open-label cluster-randomized controlled trial in primary care. *Pharmacoepidemiology and Drug Safety*. 2017;26(11):1347-56.

63. Schäfer I, Kaduszkiewicz H, Mellert C, Löffler C, Mortsiefer A, Ernst A, Stolzenbach CO, Wiese B, Abholz HH, Scherer M, van den Bussche H. Narrative medicine-based intervention in primary care to reduce polypharmacy: results from the cluster-randomised controlled trial MultiCare AGENDA. *BMJ Open*. 2018 1;8(1):e017653.
64. Roth MT, Ivey JL, Esserman DA, Crisp G, Kurz J, Weinberger M. Individualized medication assessment and planning: optimizing medication use in older adults in the primary care setting. *Pharmacotherapy: The Journal of Human Pharmacology and Drug Therapy*. 2013;33(8):787-97.
65. Ros JJ, Koekkoek TJ, Kalf A, van den Bemt PM, Van Kan HJ. Impact of joint consultation by a clinical pharmacist and a clinical geriatrician to improve inappropriate prescribing for elderly patients. *European Journal of Hospital Pharmacy*. 2017 1;24(1):26-30.
66. Rognstad S, Brekke M, Gjelstad S, Straand J, Fetveit A. Potentially Inappropriate Prescribing to Older Patients: Criteria, Prevalence and an Intervention to Reduce It: The Prescription Peer Academic Detailing (Rx-PAD) Study—A Cluster-Randomized, Educational Intervention in Norwegian General Practice. *Basic & Clinical Pharmacology & Toxicology*. 2018;123(4):380-91.
67. Raschi E, Piccinni C, Signoretta V, Lionello L, Bonezzi S, Delfino M, Di Candia L, Di Castri L, Pieraccini F, Carati D, Poluzzi E. Clinically important drug–drug interactions in poly-treated elderly outpatients: a campaign to improve appropriateness in general practice. *British Journal of Clinical Pharmacology*. 2015;80(6):1411-20.
68. Price M, Davies I, Rusk R, Lesperance M, Weber J. Applying STOPP guidelines in primary care through electronic medical record decision support: randomized control trial highlighting the importance of data quality. *JMIR Medical Informatics*. 2017;5(2):e15.
69. Prados-Torres A, del Cura-González I, Prados-Torres D, López-Rodríguez JA, Leiva-Fernández F, Calderón-Larrañaga A, López-Verde F, Gimeno-Feliu LA, Escortell-Mayor E, Pico-Soler V, Sanz-Cuesta T. Effectiveness of an intervention for improving drug prescription in primary care patients with multimorbidity and polypharmacy: study protocol of a cluster randomized clinical trial (Multi-PAP project). *Implementation Science*. 2017;12(1):54.
70. Nuez CR, González M, Martínez G, Gómez M, Roca M, Solera C, Mañé B, Ramírez RM, Gutiérrez C, Acezat J, Rodríguez D. A person centred approach for reducing drug burden in complex patients with multimorbidity[abstract]. *International Journal of Integrated Care (IJIC)*. 2016 2;16(6).
71. Muth C, Uhlmann L, Haefeli WE, Rochon J, van den Akker M, Perera R, Güthlin C, Beyer M, Oswald F, Valderas JM, Knottnerus JA. Effectiveness of a complex intervention on Prioritising Multimедication in Multimorbidity (PRIMUM) in primary care: results of a pragmatic cluster randomised controlled trial. *BMJ Open*. 2018 1;8(2):e017740.
72. Martinez J. Inappropriate Prescription in Elderly and Polypharmacy Patients in Primary Care (PHARM-PC) Trial (PHARM-PC). *ClinicalTrials.gov*.2016
73. Rosenthal G.E. Randomized Controlled Trial of Enhanced Pharmacy Care in Older Veteran Outpatients. *ClinicalTrials.gov*.2009
74. Muth C, Trampisch H. Application for an Electronic Medication Management Support System (AdAM). *ClinicalTrials.gov*. 2018.
75. Monane M, Matthias DM, Nagle BA, Kelly MA. Improving prescribing patterns for the elderly through an online drug utilization review intervention: a system linking the physician, pharmacist, and computer. *JAMA*. 1998 14;280(14):1249-52.
76. Milos V, Rekman E, Bondesson Å, Eriksson T, Jakobsson U, Westerlund T, Midlöv P. Improving the quality of pharmacotherapy in elderly primary care patients through medication reviews: a randomised controlled study. *Drugs & Aging*. 2013 1;30(4):235-46.
77. Gardner AL, Thomas JM, Mecca MC, Hyson A, Niehoff KM, Jeffery S, Sellinger J, Brienza R. Initiative to Minimize Pharmaceutical Risk in Older Veterans (IMPROVE) Polypharmacy Clinic. *Federal Practitioner*. 2018;35(11):40.

- 1  
2  
3 78. McKinnon M, Townsend J, Cooper J, Hunt B, Patel J. Systematic review and clinical  
4 governance in repeat prescribing in general practice. *Primary Health Care Research &*  
5 *Development*. 2001;2(4):235-40.  
6  
7 79. McCarthy C, Clyne B, Corrigan D, Boland F, Wallace E, Moriarty F, Fahey T, Hughes C,  
8 Gillespie P, Smith SM. Supporting prescribing in older people with multimorbidity and  
9 significant polypharmacy in primary care (SPPiRE): a cluster randomised controlled trial  
10 protocol and pilot. *Implementation Science*. 2017;12(1):99.  
11  
12 80. Mak K, Kiesrth B. Implementation and evaluation of a pilot pharmacist-conducted medication  
13 therapy management service for polypharmacy patients in a managed care setting. *American*  
14 *Pharmacist Association*. 2010; 50(2): 234.  
15  
16  
17  
18  
19  
20  
21  
22  
23  
24  
25  
26  
27  
28  
29  
30  
31  
32  
33  
34  
35  
36  
37  
38  
39  
40  
41  
42  
43  
44  
45  
46  
47  
48  
49  
50  
51  
52  
53  
54  
55  
56  
57  
58  
59  
60

For peer review only

## Preferred Reporting Items for Systematic reviews and Meta-Analyses extension for Scoping Reviews (PRISMA-ScR) Checklist

| SECTION                           | ITEM | PRISMA-ScR CHECKLIST ITEM                                                                                                                                                                                                                                                                                  | REPORTED ON PAGE #   |
|-----------------------------------|------|------------------------------------------------------------------------------------------------------------------------------------------------------------------------------------------------------------------------------------------------------------------------------------------------------------|----------------------|
| <b>TITLE</b>                      |      |                                                                                                                                                                                                                                                                                                            |                      |
| Title                             | 1    | Identify the report as a scoping review.                                                                                                                                                                                                                                                                   | 1                    |
| <b>ABSTRACT</b>                   |      |                                                                                                                                                                                                                                                                                                            |                      |
| Structured summary                | 2    | Provide a structured summary that includes (as applicable): background, objectives, eligibility criteria, sources of evidence, charting methods, results, and conclusions that relate to the review questions and objectives.                                                                              | 2                    |
| <b>INTRODUCTION</b>               |      |                                                                                                                                                                                                                                                                                                            |                      |
| Rationale                         | 3    | Describe the rationale for the review in the context of what is already known. Explain why the review questions/objectives lend themselves to a scoping review approach.                                                                                                                                   | 4-5                  |
| Objectives                        | 4    | Provide an explicit statement of the questions and objectives being addressed with reference to their key elements (e.g., population or participants, concepts, and context) or other relevant key elements used to conceptualize the review questions and/or objectives.                                  | 5                    |
| <b>METHODS</b>                    |      |                                                                                                                                                                                                                                                                                                            |                      |
| Protocol and registration         | 5    | Indicate whether a review protocol exists; state if and where it can be accessed (e.g., a Web address); and if available, provide registration information, including the registration number.                                                                                                             | NA                   |
| Eligibility criteria              | 6    | Specify characteristics of the sources of evidence used as eligibility criteria (e.g., years considered, language, and publication status), and provide a rationale.                                                                                                                                       | 6                    |
| Information sources*              | 7    | Describe all information sources in the search (e.g., databases with dates of coverage and contact with authors to identify additional sources), as well as the date the most recent search was executed.                                                                                                  | 6                    |
| Search                            | 8    | Present the full electronic search strategy for at least 1 database, including any limits used, such that it could be repeated.                                                                                                                                                                            | Supplementary File 2 |
| Selection of sources of evidence† | 9    | State the process for selecting sources of evidence (i.e., screening and eligibility) included in the scoping review.                                                                                                                                                                                      | 5-7                  |
| Data charting process‡            | 10   | Describe the methods of charting data from the included sources of evidence (e.g., calibrated forms or forms that have been tested by the team before their use, and whether data charting was done independently or in duplicate) and any processes for obtaining and confirming data from investigators. | 8                    |
| Data items                        | 11   | List and define all variables for which data were sought and any assumptions and simplifications made.                                                                                                                                                                                                     | 8                    |
| Critical appraisal of individual  | 12   | If done, provide a rationale for conducting a critical appraisal of included sources of evidence; describe                                                                                                                                                                                                 | NA                   |

| SECTION                                       | ITEM | PRISMA-ScR CHECKLIST ITEM                                                                                                                                                                       | REPORTED ON PAGE #   |
|-----------------------------------------------|------|-------------------------------------------------------------------------------------------------------------------------------------------------------------------------------------------------|----------------------|
| sources of evidence§                          |      | the methods used and how this information was used in any data synthesis (if appropriate).                                                                                                      |                      |
| Synthesis of results                          | 13   | Describe the methods of handling and summarizing the data that were charted.                                                                                                                    | 8                    |
| <b>RESULTS</b>                                |      |                                                                                                                                                                                                 |                      |
| Selection of sources of evidence              | 14   | Give numbers of sources of evidence screened, assessed for eligibility, and included in the review, with reasons for exclusions at each stage, ideally using a flow diagram.                    | Figure 1             |
| Characteristics of sources of evidence        | 15   | For each source of evidence, present characteristics for which data were charted and provide the citations.                                                                                     | Table 1 (pages 9-10) |
| Critical appraisal within sources of evidence | 16   | If done, present data on critical appraisal of included sources of evidence (see item 12).                                                                                                      | NA                   |
| Results of individual sources of evidence     | 17   | For each included source of evidence, present the relevant data that were charted that relate to the review questions and objectives.                                                           | 9-15                 |
| Synthesis of results                          | 18   | Summarize and/or present the charting results as they relate to the review questions and objectives.                                                                                            | 9-15                 |
| <b>DISCUSSION</b>                             |      |                                                                                                                                                                                                 |                      |
| Summary of evidence                           | 19   | Summarize the main results (including an overview of concepts, themes, and types of evidence available), link to the review questions and objectives, and consider the relevance to key groups. | 15-16                |
| Limitations                                   | 20   | Discuss the limitations of the scoping review process.                                                                                                                                          | 17-18                |
| Conclusions                                   | 21   | Provide a general interpretation of the results with respect to the review questions and objectives, as well as potential implications and/or next steps.                                       | 18                   |
| <b>FUNDING</b>                                |      |                                                                                                                                                                                                 |                      |
| Funding                                       | 22   | Describe sources of funding for the included sources of evidence, as well as sources of funding for the scoping review. Describe the role of the funders of the scoping review.                 | 29                   |

JBI = Joanna Briggs Institute; PRISMA-ScR = Preferred Reporting Items for Systematic reviews and Meta-Analyses extension for Scoping Reviews.

\* Where *sources of evidence* (see second footnote) are compiled from, such as bibliographic databases, social media platforms, and Web sites.

† A more inclusive/heterogeneous term used to account for the different types of evidence or data sources (e.g., quantitative and/or qualitative research, expert opinion, and policy documents) that may be eligible in a scoping review as opposed to only studies. This is not to be confused with *information sources* (see first footnote).

‡ The frameworks by Arksey and O'Malley (6) and Levac and colleagues (7) and the JBI guidance (4, 5) refer to the process of data extraction in a scoping review as data charting.

§ The process of systematically examining research evidence to assess its validity, results, and relevance before using it to inform a decision. This term is used for items 12 and 19 instead of "risk of bias" (which is more applicable to systematic reviews of interventions) to include and acknowledge the various sources of evidence that may be used in a scoping review (e.g., quantitative and/or qualitative research, expert opinion, and policy document).

From: Tricco AC, Lillie E, Zarin W, O'Brien KK, Colquhoun H, Levac D, et al. PRISMA Extension for Scoping Reviews (PRISMA-ScR): Checklist and Explanation. *Ann Intern Med.* 2018;169:467–473. doi: 10.7326/M18-0850.

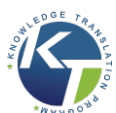

St. Michael's

Inspired Care. For peer review only - <http://bmjopen.bmj.com/site/about/guidelines.xhtml>  
Inspiring Science.
