# Supplementary material for: Intervention elements to reduce inappropriate prescribing for older adults with multimorbidity receiving outpatient care: a scoping review
Source: PubMed Central journal article supplement — BMJ Open. 2020 Aug 20;10(8):e039543. doi: 10.1136/bmjopen-2020-039543 (PMC7440708; doi:10.1136/bmjopen-2020-039543), 2020-08-20
Supplement: bmjopen-2020-039543supp001.pdf [file bmjopen-2020-039543supp001.pdf]

| Research Question: What <u>intervention elements</u> ( <i>Concept (1)</i> ) have been adopted to <u>reduce inappropriate prescribing</u> ( <i>Concept (2)</i> ) among <u>older adults</u> ( <i>Population (1)</i> ) with <u>multimorbidity</u> ( <i>Population (2)</i> ) in <u>outpatient care</u> ( <i>Context</i> )? |                                                                                                                                                                                                                                              |                                         |                                                                                                                                                                                                             |                                                                                                                                                                                                                                                                                                                     |                                                                                                              |
|------------------------------------------------------------------------------------------------------------------------------------------------------------------------------------------------------------------------------------------------------------------------------------------------------------------------|----------------------------------------------------------------------------------------------------------------------------------------------------------------------------------------------------------------------------------------------|-----------------------------------------|-------------------------------------------------------------------------------------------------------------------------------------------------------------------------------------------------------------|---------------------------------------------------------------------------------------------------------------------------------------------------------------------------------------------------------------------------------------------------------------------------------------------------------------------|--------------------------------------------------------------------------------------------------------------|
|                                                                                                                                                                                                                                                                                                                        | Population (1)<br><b>Older adults *</b>                                                                                                                                                                                                      | Population (2)<br><b>Multimorbidity</b> | Concept (1)<br><b>Interventions</b>                                                                                                                                                                         | Concept (2)<br><b>Reduce inappropriate prescribing</b>                                                                                                                                                                                                                                                              | Context<br><b>Outpatient care</b>                                                                            |
| MeSH Terms                                                                                                                                                                                                                                                                                                             | Aged                                                                                                                                                                                                                                         | Comorbidity<br>Multimorbidity           | Medication Reconciliation<br>Patient Care Management<br>Case management<br>Drug Utilization Review<br>Guideline Adherence<br>Decision Support Systems, Clinical                                             | Inappropriate Prescribing<br>Polypharmacy<br>Potentially Inappropriate Medication List<br>Deprescriptions<br>Drug Prescriptions<br>Practice Patterns, Physicians'                                                                                                                                                   | Ambulatory Care<br>Outpatient Clinics, Hospital<br>Community Health Centers<br>Primary Health Care           |
| Key Words                                                                                                                                                                                                                                                                                                              | Aged<br>Elderly<br>Senior<br>Seniors<br>Older person<br>Older persons<br>Older people<br>Older adult<br>Older adults<br>Older patient<br>Older patients<br>Older<br>population<br>Older subject<br>Older subjects<br>Geriatric<br>Geriatrics | Comorbidity<br>Multimorbidity           | Intervention<br>Interventions<br>Implementation<br>Strategy<br>Strategies<br>Behavior change technique<br>Medication review<br>Medication reviews<br>Medication management<br>Medication therapy management | Prescribing<br>Prescription<br>Prescriptions<br>Medication<br>Medications<br>Medicine<br>Medicines<br>Drug prescription<br>Drug prescriptions<br>Inappropriate prescribing<br>Deprescribing<br>Physician practice pattern<br>Physician practice patterns<br>Clinical practice pattern<br>Clinical practice patterns | Outpatient<br>Ambulatory Care<br>Clinic<br>Clinics<br>Primary Care<br>Primary Healthcare<br>General Practice |

\* Search terms under Population (1) were removed after several iterative searches to increase the breadth of our search. However, we specified under our eligibility criteria to include studies as long as they involved adults above the age of 65.
