# Supplementary material for: Intervention elements to reduce inappropriate prescribing for older adults with multimorbidity receiving outpatient care: a scoping review
Source: PubMed Central journal article supplement — BMJ Open. 2020 Aug 20;10(8):e039543. doi: 10.1136/bmjopen-2020-039543 (PMC7440708; doi:10.1136/bmjopen-2020-039543), 2020-08-20
Supplement: bmjopen-2020-039543supp002.pdf [file bmjopen-2020-039543supp002.pdf]

### PubMed Search Strategy

Search (((Comorbidity[MeSH Terms]) OR (Multimorbidity[MeSH Terms]) OR "Polypharmacy"[Mesh])) OR (((comorbidity[Title/Abstract] OR multimorbidity[Title/Abstract] OR polypharmacy[Title/Abstract])) OR (comorbidity[Text Word] OR multimorbidity[Text Word] OR polypharmacy[Text Word])) AND (((("Medication Reconciliation"[Mesh] OR "Patient Care Management"[Mesh] OR "Case Management"[Mesh] OR "Drug Utilization Review"[Mesh] OR "Guideline Adherence"[Mesh] OR "Decision Support Systems, Clinical"[Mesh])) OR (((intervention[Title/Abstract] OR interventions[Title/Abstract] OR implementation[Title/Abstract] OR strategy[Title/Abstract] OR strategies[Title/Abstract] OR medication review[Title/Abstract] OR medication reviews[Title/Abstract] OR medication management[Title/Abstract] OR medication therapy management[Title/Abstract] OR behavior change technique[Title/Abstract])) OR (intervention[Text Word] OR interventions[Text Word] OR implementation[Text Word] OR strategy[Text Word] OR strategies[Text Word] OR medication review[Text Word] OR medication reviews[Text Word] OR medication management[Text Word] OR medication therapy management[Text Word] OR behavior change technique[Text Word]))) AND (((("Inappropriate Prescribing"[Mesh] OR "Potentially Inappropriate Medication List"[Mesh] OR "Deprescriptions"[Mesh] OR "Drug Prescriptions"[Mesh] OR "Practice Patterns, Physicians"[Mesh])) OR (((prescribing[Title/Abstract] OR prescription[Title/Abstract] OR prescriptions[Title/Abstract] OR medication[Title/Abstract] OR medications[Title/Abstract] OR medicine[Title/Abstract] OR medicines[Title/Abstract] OR drug prescription[Title/Abstract] OR drug prescriptions[Title/Abstract] OR inappropriate prescribing[Title/Abstract] OR deprescribing[Title/Abstract] OR physician practice pattern[Title/Abstract] OR physician practice patterns[Title/Abstract] OR clinical practice pattern[Title/Abstract] OR clinical practice patterns[Title/Abstract])) OR (prescribing[Text Word] OR prescription[Text Word] OR prescriptions[Text Word] OR medication[Text Word] OR medications[Text Word] OR medicine[Text Word] OR medicines[Text Word] OR drug prescription[Text Word] OR drug prescriptions[Text Word] OR inappropriate prescribing[Text Word] OR deprescribing[Text Word] OR physician practice pattern[Text Word] OR physician practice patterns[Text Word] OR clinical practice pattern[Text Word] OR clinical practice patterns[Text Word]))) AND (((("Ambulatory Care"[Mesh] OR "Outpatient Clinics, Hospital"[Mesh] OR "Community Health Centers"[Mesh] OR "Primary Health Care"[Mesh])) OR (((Outpatient[Title/Abstract] OR Ambulatory Care[Title/Abstract] OR Clinic[Title/Abstract] OR Clinics[Title/Abstract] OR Primary Care[Title/Abstract] OR Primary Healthcare[Title/Abstract] OR General Practice[Title/Abstract])) OR (Outpatient[Text Word] OR Ambulatory Care[Text Word] OR Clinic[Text Word] OR Clinics[Text Word] OR Primary Care[Text Word] OR Primary Healthcare[Text Word] OR General Practice[Text Word]))) AND (("1998/01/01"[PDat] : "2019/12/31"[PDat]) AND English[lang])
