# Supplementary material for: Intervention elements to reduce inappropriate prescribing for older adults with multimorbidity receiving outpatient care: a scoping review
Source: PubMed Central journal article supplement — BMJ Open. 2020 Aug 20;10(8):e039543. doi: 10.1136/bmjopen-2020-039543 (PMC7440708; doi:10.1136/bmjopen-2020-039543), 2020-08-20
Supplement: bmjopen-2020-039543supp003.pdf [file bmjopen-2020-039543supp003.pdf]

**BCW intervention function definitions and examples**

| Intervention Function              | Definition                                                                                                                                                                  | Example of intervention function                                                                                                                |
|------------------------------------|-----------------------------------------------------------------------------------------------------------------------------------------------------------------------------|-------------------------------------------------------------------------------------------------------------------------------------------------|
| <b>Education</b>                   | Increasing knowledge or understanding                                                                                                                                       | Providing information to promote healthy eating                                                                                                 |
| <b>Persuasion</b>                  | Using communication to induce positive or negative feelings or stimulate action                                                                                             | Using imagery to motivate increases in physical activity                                                                                        |
| <b>Incentivisation</b>             | Creating an expectation of reward                                                                                                                                           | Using prize draws to induce attempts to stop smoking                                                                                            |
| <b>Coercion</b>                    | Creating an expectation of punishment or cost                                                                                                                               | Raising the financial cost to reduce excessive alcohol consumption                                                                              |
| <b>Training</b>                    | Imparting skills                                                                                                                                                            | Advanced driver training to increase safe driving                                                                                               |
| <b>Restriction</b>                 | Using rules to reduce the opportunity to engage in the target behaviour (or to increase the target behaviour by reducing the opportunity to engage in competing behaviours) | Prohibiting sales of solvents to people under 18 to reduce use for intoxication                                                                 |
| <b>Environmental restructuring</b> | Changing the physical or social context                                                                                                                                     | Providing on-screen prompts for GPs to ask about smoking behaviour                                                                              |
| <b>Modelling</b>                   | Providing an example for people to aspire to or imitate                                                                                                                     | Using TV drama scenes involving safe sex practices to increase condom use                                                                       |
| <b>Enablement</b>                  | Increasing means/reducing barriers to increase capability (beyond education and training) or opportunity (beyond environmental restructuring)                               | Behavioral support for smoking cessation, medication for cognitive deficits, surgery to reduce obesity, prostheses to promote physical activity |

Taken from: Michie S, Atkins L, West R. *The Behavior Change Wheel: A Guide to Designing Interventions*. London, UK: Silverback Publishing 2014.
