# Supplementary material for: Intervention elements to reduce inappropriate prescribing for older adults with multimorbidity receiving outpatient care: a scoping review
Source: PubMed Central journal article supplement — BMJ Open. 2020 Aug 20;10(8):e039543. doi: 10.1136/bmjopen-2020-039543 (PMC7440708; doi:10.1136/bmjopen-2020-039543), 2020-08-20
Supplement: bmjopen-2020-039543supp004.pdf [file bmjopen-2020-039543supp004.pdf]

### List of Included Studies

1. Allard J, Hébert R, Rioux M, Asselin J, Voyer L. Efficacy of a clinical medication review on the number of potentially inappropriate prescriptions prescribed for community-dwelling elderly people. *Canadian Medical Association Journal*. 2001;164(9):1291-6.
2. Benson H, Lucas C, Kmet W, Benrimoj SI, Williams K. Pharmacists in general practice: a focus on drug-related problems. *International Journal of Clinical Pharmacy*. 2018 1;40(3):566-72.
3. Blakey SA, Hixson-Wallace JA. Clinical and economic effects of pharmacy services in a geriatric ambulatory clinic. *Pharmacotherapy: The Journal of Human Pharmacology and Drug Therapy*. 2000;20(10):1198-203.
4. Brandt M, Hallas J, Graabæk T, Pottgård A. Description of a practice model for pharmacist medication review in a general practice setting. *Pharmacy Practice*. 2014;12(3).
5. Bregnhøj L, Thirstrup S, Kristensen MB, Bjerrum L, Sonne J. Combined intervention programme reduces inappropriate prescribing in elderly patients exposed to polypharmacy in primary care. *European journal of clinical pharmacology*. 2009 1;65(2):199-207.
6. Brett M, Graham KL. When less is more: teaching the art and science of deprescribing to address polypharmacy in primary care [abstract]. *Journal of general internal medicine* 2018 1; 33: S750.
7. Campins L, Serra-Prat M, Gózaló I, López D, Palomera E, Agustí C, Cabré M. Randomized controlled trial of an intervention to improve drug appropriateness in community-dwelling polymedicated elderly people. *Family practice*. 2017 1;34(1):36-42.
8. Cardwell K, Clyne B, Moriarty F, Wallace E, Fahey T, Boland F, McCullagh L, Clarke S, Finnigan K, Daly M, Barry M. Supporting prescribing in Irish primary care: protocol for a non-randomised pilot study of a general practice pharmacist (GPP) intervention to optimise prescribing in primary care. *Pilot and feasibility studies*. 2018;4(1):122.
9. Chan DC, Chen JH, Wen CJ, Chiu LS, Wu SC. Effectiveness of the medication safety review clinics for older adults prescribed multiple medications. *Journal of the Formosan Medical Association*. 2014 1;113(2):106-13.
10. Chiu Y, Lin G, Wu T. By implementing of medication reconciliation to improve the medication safety of patients with polypharmacy issues [abstract]. *ACCP Global Conference on Clinical Pharmacy*. 2018;P. 230.
11. Christensen DB, Roth M, Trygstad T, Byrd J. Evaluation of a pilot medication therapy management project within the North Carolina State Health Plan. *Journal of the American Pharmacists Association*. 2007 1;47(4):471-83.
12. Clyne B, Bradley MC, Hughes C, Fahey T, Lapane KL. Electronic prescribing and other forms of technology to reduce inappropriate medication use and polypharmacy in older people: a review of current evidence. *Clinics in geriatric medicine*. 2012 1;28(2):301-22.
13. Conway S, Smith E. Comprehensive medication management within primary care office of patient-centered medical home model [abstract]. *Pharmacotherapy*. 2017;137(12):E215.
14. Dalin DA, Vermehren C, Jensen AK, Unkerskov J, Reuther LØ, Andersen JP. 107 Systematic medication review in general practice—a collaboration between clinical pharmacology and general practice [abstract].
15. Dauphinot V, Jean-Bart E, Krolak-Salmon P, Mouchoux C. A multi-center, randomized, controlled trial to assess the efficacy of optimization of drug prescribing in an elderly population, at 18 months of follow-up, in the evolution of functional autonomy: the OPTIM study protocol. *BMC geriatrics*. 2017 1;17(1):195.
16. Esmaily HM, Silver I, Shiva S, Gargani A, Maleki-Dizaji N, Al-Maniri A, Wahlstrom R. Can rational prescribing be improved by an outcome-based educational approach? A randomized trial completed in Iran. *Journal of Continuing Education in the Health Professions*. 2010;30(1):11-8.

17. Fick DM, Maclean JR, Rodriguez NA, Short L, Heuvel RV, Waller JL, Rogers RL. A randomized study to decrease the use of potentially inappropriate medications among community-dwelling older adults in a southeastern managed care organization. *Am J Manag Care*. 2004 1;10(11):761-8.
18. Fillit HM, Futterman R, Orland BI, Chim T, Susnow L, Picariello GP, Scheye EC, Spoeri RK, Roglieri JL, Warburton SW. Polypharmacy management in Medicare managed care: changes in prescribing by primary care physicians resulting from a program promoting medication reviews. *Am J Manag Care*. 1999 1;5(5):587-94.
19. Frankfort SV, Tulner LR, van Campen JP, Koks CH, Beijnen JH. Evaluation of pharmacotherapy in geriatric patients after performing complete geriatric assessment at a diagnostic day clinic. *Clinical drug investigation*. 2006 1;26(3):169-74.
20. Gibert P, Cabaret M, Moulis M, Bosson JL, Boivin JE, Chanoine S, Allenet B, Bedouch P, Gavazzi G. Optimizing medication use in elderly people in primary care: Impact of STOPP criteria on inappropriate prescriptions. *Archives of gerontology and geriatrics*. 2018 1;75:16-9.
21. Gómez MA, Villafaina A, Hernández J, Salgado RM, González MÁ, Rodríguez J, Concha MM, Tarrío A, Gervasini G, Carrillo JA. Promoting appropriate drug use through the application of the Spanish drug-related problem classification system in the primary care setting. *Annals of Pharmacotherapy*. 2009;43(2):339-46.
22. Harris IM, Westberg SM, Frakes MJ, Van Vooren JS. Outcomes of medication therapy review in a family medicine clinic. *Journal of the American Pharmacists Association*. 2009 1;49(5):623-7.
23. Hasler S, Senn O, Rosemann T, Neuner-Jehle S. Effect of a patient-centered drug review on polypharmacy in primary care patients: study protocol for a cluster-randomized controlled trial. *Trials*. 2015 Dec;16(1):380.
24. Hazen AC, Zwart DL, Poldervaart JM, de Gier JJ, de Wit NJ, de Bont AA, Bouvy ML. Non-dispensing pharmacists' actions and solutions of drug therapy problems among elderly polypharmacy patients in primary care. *Family practice*. 2019;36(5):544-51.
25. Hoffman J, Gleiberman S, Stern D, Osterweil D. Impact of a Pharmacist in a Specialized Ambulatory Care Geriatric Setting [abstract]. *Journal of the American Geriatrics Society*. 2014;62:B136.
26. Hsu YM, Hsu LZ, Huang CH, Hsu SL, Chien SY. PHP57 Clinical Effects of Pharmacist Interventions for Polypharmacy in a Geriatric Clinic in Taiwan [abstract]. *Value in Health*. 2012 1;15(7):A619.
27. Jäger C, Freund T, Steinhäuser J, Stock C, Krisam J, Kaufmann-Kolle P, Wensing M, Szecsenyi J. Impact of a tailored program on the implementation of evidence-based recommendations for multimorbid patients with polypharmacy in primary care practices—results of a cluster-randomized controlled trial. *Implementation Science*. 2017;12(1):8.
28. Khera S, Abbasi M, Dabravolskaj J, Sadowski CA, Makhinova T, Lee H. Integrated primary care medication management process for older adults with frailty [abstract]. *Journal of the American Geriatrics Society*. 2018 1;66: S51-S52.
29. Kiel WJ, Phillips SW. Impact of pharmacist-conducted comprehensive medication reviews for older adult patients to reduce medication related problems. *Pharmacy*. 2018;6(1):2.
30. Rodondi N. OPTimising thERapy to Prevent Avoidable Hospital admissions in the multimorbid older people. *ClinicalTrials.gov*. 2017.
31. Kwint HF, Mertens BJ, Bouvy ML. Impact of deprescribing as part of clinical medication review on polypharmacy of older patients in an integrated primary care setting [abstract]. *International Journal Of Clinical Pharmacy*. 2017 1;39(4): 969.
32. LaBella S, Li G, Barnes K, Matthews D, Beatty S. Measuring the impact of an interdisciplinary polypharmacy clinic within a patient-centered medical home [abstract]. *Journal of the American Pharmacists Association*. 2014:144

33. González ML, Martin MF, Girones MZ, Hernández MC. PS-080 Drug related problems identified through medication review in elderly patients in primary healthcare [poster]. *EAHP*. 2016;PS-080.
34. Lampela P, Hartikainen S, Lavikainen P, Sulkava R, Huupponen R. Effects of medication assessment as part of a comprehensive geriatric assessment on drug use over a 1-year period. *Drugs & Aging*. 2010 1;27(6):507-21.
35. Lea SC, Watts KL, Davis NA, Panayiotou B, Bankart MJ, Arora A, Chambers R. The potential clinical benefits of medicines optimisation through comprehensive geriatric assessment, carried out by secondary care geriatricians, in a general practice care setting in North Staffordshire, UK: a feasibility study. *BMJ Open*. 2017 1;7(9):e015278.
36. Leendertse AJ, de Koning GHP, Goudswaard AN, *et al*. Preventing hospital admissions by reviewing medication (PHARM) in primary care: an open controlled study in an elderly population. *J Clin Pharm Ther* 2013;38:379–87. doi:10.1111/jcpt.12069
37. Lenander C, Bondesson Å, Viberg N, Jakobsson U, Beckman A, Midlöv P. Effects of an intervention (SÄKLÄK) on prescription of potentially inappropriate medication in elderly patients. *Family practice*. 2017;34:213-8.
38. Lenander C, Elfsson B, Danielsson B, Midlöv P, Hasselström J. Effects of a pharmacist-led structured medication review in primary care on drug-related problems and hospital admission rates: a randomized controlled trial. *Scandinavian Journal of Primary Health Care*. 2014 1;32(4):180-6.
39. Lin HW, Lin CH, Chang CK, Chou CY, Yu IW, Lin CC, Li TC, Li CI, Hsieh YW. Economic outcomes of pharmacist-physician medication therapy management for polypharmacy elderly: A prospective, randomized, controlled trial. *Journal of the Formosan Medical Association*. 2018 1;117(3):235-43.
40. Linton A, Bacon TA, Trice S, Devine J, Cottrell L, McGinnis TJ, McAllister EB. Results from a mailed promotion of medication reviews among Department of Defense beneficiaries receiving 10 or more chronic medications. *Journal of Managed Care Pharmacy*. 2010;16(8):578-92.
41. Jungo KT, Rozsnyai Z, Mantelli S, Floriani C, Löwe AL, Lindemann F, Schwab N, Meier R, Elloumi L, Huibers CJ, Sallevelt BT. ‘Optimising PharmacoTherapy In the multimorbid elderly in primary Care: the OPTICA trial. *ClinicalTrials*, gov. 2019.
42. Greiver M, Dahrouge S, O’Brien P, Manca D, Lussier MT, Wang J, Burge F, Grandy M, Singer A, Twohig M, Moineddin R. Improving care for elderly patients living with polypharmacy: protocol for a pragmatic cluster randomized trial in community-based primary care practices in Canada. *Implementation Science*. 2019 1;14(1):55.
43. Zarowitz BJ, Stebelsky LA, Muma BK, Romain TM, Peterson EL. Reduction of high-risk polypharmacy drug combinations in patients in a managed care setting. *Pharmacotherapy: The Journal of Human Pharmacology and Drug Therapy*. 2005;25(11):1636-45.
44. Woodward MC, Streeton CL, Guttman A, Killer GT, Peck RW. Polypharmacy management among Australian veterans: improving prescribing through the Australian Department of Veterans’ Affairs’ prescriber feedback programme. *Internal Medicine Journal*. 2008;38(2):95-100.
45. Willeboordse F, Schellevis FG, Chau SH, Hugtenburg JG, Elders PJ. The effectiveness of optimised clinical medication reviews for geriatric patients: Opti-Med a cluster randomised controlled trial. *Family Practice*. 2017 1;34(4):437-45.
46. White C, Hughes-Stricklett A. The impact of a pharmacy resident geriatric clinic [abstract]. *Pharmacotherapy*. 2013 1;33(10): E254.
47. Wessell AM, Nietert PJ, Jenkins RG, Nemeth LS, Ornstein SM. Inappropriate medication use in the elderly: results from a quality improvement project in 99 primary care practices. *The American Journal of Geriatric Pharmacotherapy*. 2008 1;6(1):21-7.

48. Weiss BD, Brega AG, LeBlanc WG, Mabachi NM, Barnard J, Albright K, Cifuentes M, Brach C, West DR. Improving the effectiveness of medication review: guidance from the health literacy universal precautions toolkit. *The Journal of the American Board of Family Medicine*. 2016 1;29(1):18-23.
49. Vanderman AJ, Moss JM, Bryan III WE, Sloane R, Jackson GL, Hastings SN. Evaluating the impact of medication safety alerts on prescribing of potentially inappropriate medications for older veterans in an ambulatory care setting. *Journal of Pharmacy Practice*. 2017;30(1):82-8.
50. Touchette DR, Masica AL, Dolor RJ, Schumock GT, Choi YK, Kim Y, Smith SR. Safety-focused medication therapy management: a randomized controlled trial. *Journal of the American Pharmacists Association*. 2012 1;52(5):603-12.
51. Thomas J, Zapatka S, Brienza R, Islam L, Langerman S, Mecca M, Niehoff K, Hyson A. Mastering the art of deprescribing: An interprofessional outpatient polypharmacy program for older veterans using the shared medical appointment model: D106 [abstract]. *Journal of the American Geriatrics Society*. 2014;62.
52. Taylor CT, Byrd DC, Krueger K. Improving primary care in rural Alabama with a pharmacy initiative. *American Journal of Health-System Pharmacy*. 2003 1;60(11):1123-9.
53. Tan EC, Stewart K, Elliott RA, George J. Pharmacist consultations in general practice clinics: the Pharmacists in Practice Study (PIPS). *Research in Social and Administrative Pharmacy*. 2014 1;10(4):623-32.
54. Tamblin R, Huang A, Perreault R, Jacques A, Roy D, Hanley J, McLeod P, Laprise R. The medical office of the 21st century (MOXXI): effectiveness of computerized decision-making support in reducing inappropriate prescribing in primary care. *Canadian Medical Association Journal*. 2003 16;169(6):549-56.
55. Stefanovic SM, Jankovic SM. Knowledge of the pharmacological profile of a patient improves the quality of prescribing, the outcomes of treatment, and the utilization of health services in primary health care. *European Journal of Clinical Pharmacology*. 2011 1;67(11):1091.
56. Vandenberg AE, Echt KV, Kemp L, McGwin G, Perkins MM, Mirk AK. Academic detailing with provider audit and feedback improve prescribing quality for older veterans. *Journal of the American Geriatrics Society*. 2018;66(3):621-7.
57. Souag, A. Elderly Appropriate Treatment in Primary Care (EAT) (TAPAGE). ClinicalTrials.gov. 2017.
58. Sönnichsen A, Trampisch US, Rieckert A, Piccoliori G, Vögele A, Flamm M, Johansson T, Esmail A, Reeves D, Löffler C, Höck J. Polypharmacy in chronic diseases—reduction of inappropriate medication and adverse drug events in older populations by electronic decision support (PRIMA-eDS): study protocol for a randomized controlled trial. *Trials*. 2016 1;17(1):57.
59. Soendergaard B, Kirkeby B, Dinsen C, Herborg H, Kjellberg J, Staehr P. Drug-related problems in general practice: results from a development project in Denmark. *Pharmacy World and Science*. 2006 1;28(2):61-4.
60. Shim YW, Chua SS, Wong HC, Alwi S. Collaborative intervention between pharmacists and physicians on elderly patients: a randomized controlled trial. *Therapeutics and Clinical Risk Management*. 2018;14:1115.
61. Sellors J, Kaczorowski J, Sellors C, Dolovich L, Woodward C, Willan A, Goeree R, Cosby R, Trim K, Sebaldt R, Howard M. A randomized controlled trial of a pharmacist consultation program for family physicians and their elderly patients. *Canadian Medical Association Journal*. 2003 8;169(1):17-22.
62. Schmidt-Mende K, Andersen M, Wettermark B, Hasselström J. Educational intervention on medication reviews aiming to reduce acute healthcare consumption in elderly patients with potentially inappropriate medicines—A pragmatic open-label cluster-randomized controlled trial in primary care. *Pharmacoepidemiology and Drug Safety*. 2017;26(11):1347-56.

63. Schäfer I, Kaduszkiewicz H, Mellert C, Löffler C, Mortsiefer A, Ernst A, Stolzenbach CO, Wiese B, Abholz HH, Scherer M, van den Bussche H. Narrative medicine-based intervention in primary care to reduce polypharmacy: results from the cluster-randomised controlled trial MultiCare AGENDA. *BMJ Open*. 2018 1;8(1):e017653.
64. Roth MT, Ivey JL, Esserman DA, Crisp G, Kurz J, Weinberger M. Individualized medication assessment and planning: optimizing medication use in older adults in the primary care setting. *Pharmacotherapy: The Journal of Human Pharmacology and Drug Therapy*. 2013;33(8):787-97.
65. Ros JJ, Koekkoek TJ, Kalf A, van den Bemt PM, Van Kan HJ. Impact of joint consultation by a clinical pharmacist and a clinical geriatrician to improve inappropriate prescribing for elderly patients. *European Journal of Hospital Pharmacy*. 2017 1;24(1):26-30.
66. Rognstad S, Brekke M, Gjelstad S, Straand J, Fetveit A. Potentially Inappropriate Prescribing to Older Patients: Criteria, Prevalence and an Intervention to Reduce It: The Prescription Peer Academic Detailing (Rx-PAD) Study—A Cluster-Randomized, Educational Intervention in Norwegian General Practice. *Basic & Clinical Pharmacology & Toxicology*. 2018;123(4):380-91.
67. Raschi E, Piccini C, Signoretta V, Lionello L, Bonezzi S, Delfino M, Di Candia L, Di Castri L, Pieraccini F, Carati D, Poluzzi E. Clinically important drug–drug interactions in poly-treated elderly outpatients: a campaign to improve appropriateness in general practice. *British Journal of Clinical Pharmacology*. 2015;80(6):1411-20.
68. Price M, Davies I, Rusk R, Lesperance M, Weber J. Applying STOPP guidelines in primary care through electronic medical record decision support: randomized control trial highlighting the importance of data quality. *JMIR Medical Informatics*. 2017;5(2):e15.
69. Prados-Torres A, del Cura-González I, Prados-Torres D, López-Rodríguez JA, Leiva-Fernández F, Calderón-Larrañaga A, López-Verde F, Gimeno-Feliu LA, Escortell-Mayor E, Pico-Soler V, Sanz-Cuesta T. Effectiveness of an intervention for improving drug prescription in primary care patients with multimorbidity and polypharmacy: study protocol of a cluster randomized clinical trial (Multi-PAP project). *Implementation Science*. 2017;12(1):54.
70. Nuez CR, González M, Martínez G, Gómez M, Roca M, Solera C, Mañé B, Ramírez RM, Gutiérrez C, Acezat J, Rodríguez D. A person centred approach for reducing drug burden in complex patients with multimorbidity[abstract]. *International Journal of Integrated Care (IJIC)*. 2016 2;16(6).
71. Muth C, Uhlmann L, Haefeli WE, Rochon J, van den Akker M, Perera R, Gütthlin C, Beyer M, Oswald F, Valderas JM, Knottnerus JA. Effectiveness of a complex intervention on Prioritising Multimедication in Multimorbidity (PRIMUM) in primary care: results of a pragmatic cluster randomised controlled trial. *BMJ Open*. 2018 1;8(2):e017740.
72. Martinez J. Inappropriate Prescription in Elderly and Polypharmacy Patients in Primary Care (PHARM-PC) Trial (PHARM-PC). [ClinicalTrials.gov.2016](https://clinicaltrials.gov/ct2/show/study/NCT02700000)
73. Rosenthal G.E. Randomized Controlled Trial of Enhanced Pharmacy Care in Older Veteran Outpatients. [ClinicalTrials.gov.2009](https://clinicaltrials.gov/ct2/show/study/NCT00000000)
74. Muth C, Trampisch H. Application for an Electronic Medication Management Support System (AdAM). [ClinicalTrials.gov](https://clinicaltrials.gov/ct2/show/study/NCT02700000). 2018.
75. Monane M, Matthias DM, Nagle BA, Kelly MA. Improving prescribing patterns for the elderly through an online drug utilization review intervention: a system linking the physician, pharmacist, and computer. *JAMA*. 1998 14;280(14):1249-52.
76. Milos V, Rekman E, Bondesson Å, Eriksson T, Jakobsson U, Westerlund T, Midlöv P. Improving the quality of pharmacotherapy in elderly primary care patients through medication reviews: a randomised controlled study. *Drugs & Aging*. 2013 1;30(4):235-46.
77. Gardner AL, Thomas JM, Mecca MC, Hyson A, Niehoff KM, Jeffery S, Sellinger J, Brienza R. Initiative to Minimize Pharmaceutical Risk in Older Veterans (IMPROVE) Polypharmacy Clinic. *Federal Practitioner*. 2018;35(11):40.

78. McKinnon M, Townsend J, Cooper J, Hunt B, Patel J. Systematic review and clinical governance in repeat prescribing in general practice. *Primary Health Care Research & Development*. 2001;2(4):235-40.
79. McCarthy C, Clyne B, Corrigan D, Boland F, Wallace E, Moriarty F, Fahey T, Hughes C, Gillespie P, Smith SM. Supporting prescribing in older people with multimorbidity and significant polypharmacy in primary care (SPPiRE): a cluster randomised controlled trial protocol and pilot. *Implementation Science*. 2017;12(1):99.
80. Mak K, Kiesrth B. Implementation and evaluation of a pilot pharmacist-conducted medication therapy management service for polypharmacy patients in a managed care setting. *American Pharmacist Association*. 2010; 50(2): 234.
